# Supplementary material for: Early prediction of preeclampsia and small-for-gestational-age via multi-marker model in Chinese pregnancies: a prospective screening study
Source: BMC Pregnancy Childbirth. 2019 Aug 19;19:304. doi: 10.1186/s12884-019-2455-8 (PMC6700825; doi:10.1186/s12884-019-2455-8)
Supplement: Supplementary file 1 — Study data. This data sheet includes the testing results of markers and prediction values of PE by PREDITCTOR software of all the participants in this study. (XLS 1417 kb) [file 12884_2019_2455_MOESM1_ESM.xls]

## Sheet: Unaffected group non-PE 
Prior Risk for Early PE	Prior Risk for Late PE	Posterior Risk for Early PE	Posterior Risk for Late PE	PlGF Conc	PlGF MoM	PAPP-A MoM	PAPP-A Conc	MAP MoM	MAP
200	102	1096	471	42.7105	1.12628	0.507012	1626.35	0.963691	76.8333
200	102	74	23	52.7	4.72	2.40307	8392.86	1.22037	97.6667
220	112	3886	858	28.9	5.21	0.623109	2332.87	0.865783	70.3333
200	102	52	14	51.7	1.55372	2.22405	3960.74	1.24904	105.667
160	82	1895	561	56.1	1.33172	3.09589	13777.2	0.968317	76.3333
220	112	831	149	33.8	0.873277	1.91479	9141.86	1.05008	84
561	285	793	154	46.2	1.32803	1.78301	5542.65	1.14035	94.6667
561	285	5000	5000	31.7	0.9894	1.01132	2798.79	0.81638	65
220	112	5	63	15.9	0.517545	0.0889612	195.12	1.06324	88
561	285	5000	598	22.1	0.657768	1.12014	3048.07	0.944965	78.6667
220	112	76	31	27.2	0.817151	0.628711	1790.62	1.14987	95
561	285	2861	627	25.6	0.774914	0.616242	1546.52	0.969668	81
230	62	1579	134	42.1	1.15089	1.44019	4113.9	1.02477	88.6667
230	62	273	39	46.5	1.28983	0.680796	2135.09	1.10933	93.6667
49	25	580	51	21.1	0.550505	1.93188	7566.03	0.909689	76
585	158	4944	1381	45.1	1.10962	0.48205	2135.09	0.918053	76.3333
561	285	4545	1532	61.7	1.296	0.65323	4507.59	0.964819	77.3333
263	134	17	10	32	0.921018	1.57772	4801.22	1.29635	108
561	285	3200	377	19.1	0.521504	0.740032	2661.02	0.92893	76.6667
561	285	28	48	24.3	0.618277	0.325021	1470.62	1.16287	94
220	112	1583	223	27.5	0.798326	1.04246	3338.99	0.985953	80.6667
220	112	841	148	46.4	1.46492	1.31046	3361.29	1.07068	86.3333
220	112	1072	167	33.5	0.815756	1.69496	8697.34	1.0271	82.6667
585	158	3206	523	47.1	1.13394	0.60693	2819.59	0.986342	82
220	112	1709	464	55.5	1.30221	0.746055	3913.98	0.981983	80
561	285	3791	654	27.4	0.74545	0.716567	2803.64	0.958969	77.3333
585	158	5000	1203	47	1.01723	1.50751	8668.38	0.91173	75.3333
230	62	297	219	48.8	1.30485	0.308837	1071.07	1.002	84.6667
220	112	661	152	27.9	0.774914	0.638623	2145.2	1.01078	82.8333
220	112	2251	492	40.9755	1.12252	0.812219	3036.26	0.964017	78.3333
220	112	5000	4122	50.8122	1.14895	1.51939	9023.15	0.802341	65
220	112	3990	5000	58.1968	1.62286	0.555567	1881.49	0.83529	69
220	112	3574	1103	40.2706	1.04451	0.649296	2764.6	0.896019	73.1667
230	76	2786	515	60.1892	1.6263	1.01238	3216.46	0.96467	82
156	80	2794	988	57.3547	1.56149	0.955754	2637.56	0.923517	75.5
320	163	1329	421	26.4777	0.730705	0.468453	1526.03	0.947531	79.5
220	112	415	111	21.322	0.534515	0.479124	2530.63	0.969246	77
561	285	5000	5000	73.2782	1.86401	1.26515	6366.96	0.898249	71.3333
320	163	157	38	53.9376	1.55054	0.75458	2593.15	1.17794	96.1667
220	112	569	101	21.7725	0.569894	0.722477	3216.46	0.995577	80
561	285	1317	526	18.5776	0.573983	0.368489	983.855	0.928785	76
561	285	5000	4583	74.0709	1.80541	0.582932	2969.35	0.923283	75
561	285	1427	253	42.4592	1.06615	1.4613	6855.52	1.09015	88.3333
320	163	605	179	36.6541	0.9633	0.592891	2018.7	1.05244	88
334	90	315	62	53.4717	1.39354	0.546428	1958.91	1.1053	93.6667
320	163	857	198	35.2976	1.07736	0.73816	1909.65	1.05481	87.6667
275	74	166	29	86.6206	2.52591	3.67439	9605.23	1.17031	100
220	112	203	103	25.9395	0.75142	3.46391	11484.6	1.10488	89
274	139	18	22	17.5983	0.425843	1.85164	9899.28	1.19261	95.3333
561	285	445	109	34.9435	0.881674	1.35559	6567.77	1.14701	91.6667
561	285	5000	797	18.012	0.493413	0.532405	2065.57	0.81806	66.6667
220	112	1514	169	23.1474	0.589578	1.60657	7436.86	0.96447	77.6667
320	163	593	113	43.0901	1.01238	1.42907	8096.49	1.10687	88.3333
320	163	480	243	126.358	3.31239	0.809092	3591.13	1.05727	85
220	112	920	143	26.32	0.679388	0.873507	4151.45	0.998092	79.3333
320	163	14	21	14.5901	0.448679	0.399088	1088.86	1.14917	94.6667
561	285	5000	5000	48.4782	1.33799	0.91739	3251.77	0.869346	71.3333
320	163	1175	265	37.7796	0.990454	0.715764	2882.51	1.02576	82.6667
320	163	723	133	30.0394	0.80693	1.37944	4893.65	1.07479	87.6667
320	163	10	13	10.0401	0.284824	1.11474	3949.07	1.14904	93.3333
320	163	2503	594	71.7433	1.82783	1.96225	8584.11	1.01653	83.3333
200	102	3061	357	32.3323	0.776822	1.21268	4728.29	0.930667	75
200	102	65	26	13.6993	0.358715	0.471599	1444.11	1.01338	82.1667
200	102	443	86	23.7693	0.604035	1.83917	6442.95	1.04388	83.5
200	102	194	30	13.0751	0.33795	0.74616	2105.48	0.97235	81.3333
561	285	14	51	19.4362	0.550313	0.237274	808.005	1.14558	93.6667
320	163	260	91	70.7297	1.66807	0.571209	3155.61	1.12048	90.5
220	112	2595	504	48.193	1.25271	2.13847	8503.39	0.984742	81.3333
320	163	1755	1539	68.9723	1.6427	0.480058	2356.13	0.950802	77.3333
561	285	987	432	47.3558	1.18004	0.484001	2277.47	1.04504	85.3333
220	112	2481	381	23.3035	0.61175	0.597381	2495.08	0.874225	71
274	139	64	32	24.4261	0.551445	1.51923	7797.1	1.16349	94.6667
320	163	1272	410	28.9168	0.852033	0.507252	1406.3	0.974445	81.6667
320	163	4540	953	48.9346	1.28731	1.05519	4672.51	0.957548	76.3333
561	285	5000	879	24.0281	0.658438	0.617146	2376.22	0.904855	73.8333
220	112	1147	380	90.8384	2.33547	1.06994	5170.72	1.0177	80.6667
320	163	1558	194	26.7161	0.562833	0.892577	6579.64	0.964627	76
334	90	2570	245	55.5524	1.37149	1.28249	5654.56	1.0175	84.6667
561	285	844	557	25.148	0.765545	0.345927	901.753	0.983859	81.6667
561	285	4755	1072	61.2427	1.66618	2.04254	7991.65	1.0127	81.6667
320	163	1315	493	129.375	2.81613	2.30909	14287.2	1.03156	83
200	102	652	60	13.8775	0.364517	0.617258	1644.86	0.889859	74.5
220	112	2882	751	57.5341	1.50657	2.4499	9926.19	0.971898	79.3333
200	102	1887	455	52.6888	1.38294	0.893952	2821.9	0.981338	79.1667
561	285	765	155	44.7902	0.97869	1.13776	7401.82	1.1175	89.1667
561	285	5000	3087	72.7967	1.83572	1.29614	5748.23	0.943459	77.1667
200	102	3084	451	38.4342	1.00594	1.42068	4210.76	0.954409	78.5
320	163	1738	314	40.876	1.17172	1.01019	3169.03	1.02965	85.5
274	139	1202	897	122.175	3.26393	1.09646	3827.85	0.984335	81.1667
220	112	271	59	22.158	0.6063	0.972324	3290.1	1.06845	89
320	163	269	62	45.9792	1.26908	0.849069	3102.48	1.14733	93.5
561	285	1605	509	30.7889	0.833504	0.51617	1870.21	0.998854	82.3333
220	112	1339	233	50.8122	1.36786	1.3749	5843.45	1.03731	83.3333
561	285	2074	335	32.2961	0.872911	1.32903	4419.47	1.04908	88.5
220	112	256	100	26.6563	0.641173	0.452194	2303.39	1.01858	82.6667
220	112	245	152	47.868	1.11899	0.401268	2153.68	1.05049	85.3333
220	112	964	188	27.1688	0.669382	0.626442	2868.19	0.967139	79.3333
200	102	1651	156	21.2782	0.550818	1.07767	3322.84	0.932159	76.1667
200	102	5000	1320	47.7353	1.11171	1.50147	5779.8	0.881601	72.3333
200	102	2604	522	55.3407	1.35144	1.97131	7733.32	0.97896	78.1667
320	163	373	86	26.9969	0.692701	0.940386	3954.46	1.08661	89.6667
320	163	1378	196	19.4	0.570333	0.765111	2339.52	0.965012	78
320	163	1138	754	55.6875	1.34256	0.44183	2446.15	0.981472	78
320	163	3726	681	59.4935	1.33413	1.58737	10049.3	0.98877	78.6667
585	158	5000	516	30.5826	0.812223	0.701762	2349.47	0.943048	80.8333
200	102	5	66	27.5056	0.678118	0.0433478	163.462	1.12391	90.3333
200	102	164	44	24.7751	0.628728	1.44148	5127.11	1.1092	88.5
220	112	430	82	28.1393	0.791091	1.26425	4153.35	1.07999	89.6667
561	285	1915	308	28.329	0.778782	1.13848	4124.98	1.03929	85.6667
220	112	5000	1388	56.2801	1.46667	1.24563	5425.97	0.917869	74.6667
200	102	17	12	12.5085	0.310702	0.554805	1996.45	1.07689	86.5
200	102	192	47	35.7485	0.863612	0.89078	3029.19	1.11791	92.1667
200	67	568	261	24.5358	0.706385	0.317428	604.251	0.912979	78.6667
200	102	689	319	123.496	3.30988	2.04391	6071.41	1.02462	83.5
561	285	4338	845	43.3376	1.03499	0.827962	4106.18	0.984983	81
220	112	656	118	74.0452	1.74454	1.39016	8306.32	1.08934	86.1667
200	102	2392	476	52.2155	1.40632	1.28116	3424.52	0.981481	80.6667
220	112	3327	530	34.8913	1.0351	1.92382	6110.37	0.958691	77
220	112	409	78	30.2595	0.676413	1.05071	3736.59	1.05995	87.1667
200	102	5000	589	32.6094	0.784962	1.10746	4478.56	0.889525	70.6667
230	62	2413	164	32.1796	0.814697	1.61571	6071.41	0.971201	82.3333
561	285	2192	1069	23.4973	0.654401	0.351225	1226.17	0.896312	73.6667
561	285	369	823	36.4931	1.03952	0.241533	757.704	1.00133	83
561	285	2923	557	58.3077	1.54464	1.18184	5460.78	1.04438	82.6667
585	158	5000	675	76.8692	1.80505	0.642605	3364.35	1.00464	82.5
220	112	115	35	28.3512	0.720357	0.97391	4313.88	1.14027	92.5
220	112	1118	195	54.4151	1.3345	1.22976	5526.04	1.04685	86.8333
320	163	1603	312	31.3242	0.725562	0.653962	2152.29	0.970258	80.1667
200	54	1690	151	37.9996	0.993392	2.10655	5500.85	1.00118	84.8333
220	112	178	36	46.0376	1.13782	0.904524	2809.86	1.15229	93.6667
561	285	2169	177	13.3202	0.391035	1.37821	2483.73	0.934693	76.8333
220	112	5000	4375	44.5142	1.08846	1.10519	3305.24	0.788472	64.5
220	112	717	87	19.6396	0.436398	1.92509	7111.22	0.966741	79
561	285	311	88	32.886	0.829069	0.94173	2496.09	1.14957	95.1667
383	195	45	28	25.2712	0.645527	1.32992	3551.88	1.22065	100.833
200	102	121	31	19.2409	0.405155	1.25044	5966.91	1.05694	86.1667
220	112	1444	384	85.4925	2.12755	1.35565	6737.99	1.01763	81.6667
274	139	1370	815	49.1283	1.18967	0.448708	2152.05	0.954773	77.3333
318	162	5000	5000	65.7017	1.51952	0.563711	3742.87	0.853212	66.8333
200	102	467	305	191.823	3.94007	2.37167	12435.5	1.02382	82.1667
230	62	317	79	39.1	1.02295	0.450767	1192.43	1.04696	93.3333
220	112	5000	2852	44.7442	1.1313	0.517486	2502.65	0.835206	67.3333
200	102	105	31	37.2741	0.792733	1.121	6043.56	1.15572	90.3333
230	62	2559	321	75.8482	1.72575	1.68861	9154.11	0.988813	81.3333
200	102	5000	5000	98.7528	2.03445	0.981642	4421.41	0.846358	69.6667
585	158	5000	2403	73.8222	1.96495	0.830587	2969.44	0.927788	78
200	102	3929	621	39.4619	0.896219	0.931649	3763.04	0.906334	74.3333
561	285	5000	5000	71.7207	1.72667	0.834366	4315.19	0.8742	70.8333
220	112	2389	335	27.7608	0.757229	0.858712	3351.86	0.937628	76.3333
561	285	5000	3231	50.7061	1.16571	0.668189	3150.05	0.901471	75.3333
318	162	631	120	38.2971	1.0431	1.55574	6739.42	1.10571	87.6667
561	285	5000	5000	103.947	2.59835	1.33821	6877.39	0.906363	72.3333
220	112	5	5	5.92889	0.143597	0.522464	2601.36	0.974968	79.5
561	285	5000	1738	41.6426	1.23794	0.858858	2651.26	0.950729	77.5
320	163	1250	362	35.7456	0.934315	0.569373	2302.22	0.995584	82
220	112	96	34	28.1288	0.724075	0.736884	3516.32	1.13578	91
220	112	5000	1291	26.826	0.755005	0.603446	2170.51	0.814599	66
220	112	2027	461	19.0554	0.508395	0.395746	1732.65	0.794246	64
220	112	23	13	32.8556	0.904097	0.598901	2361.14	1.22506	98.6667
220	112	1717	220	26.9264	0.723783	1.66338	7123.44	0.981335	78.6667
220	112	521	175	40.8122	0.914583	0.523359	2570.32	1.0205	85.3333
230	62	98	18	27.0574	0.748733	0.81139	2796.07	1.14694	95.3333
220	112	1695	618	90.9646	2.26217	1.15668	5662.31	0.990194	79.6667
561	285	182	84	22.7533	0.602913	0.589619	2605.11	1.11446	89.6667
561	285	5000	605	23.8582	0.691992	1.03346	3157.84	0.953988	78.6667
230	117	475	122	32.8311	0.825506	1.0039	4767.29	0	0
220	112	1476	210	36.6678	0.815651	1.09942	6549.68	0.995393	80
220	112	5000	986	45.5583	1.20698	1.78669	7768.69	0.925461	74
220	112	555	238	36.8325	0.900413	0.448005	2514.57	0.996071	78.3333
587	298	787	247	28.6054	0.629984	1.55736	9592.19	0	0
220	112	1210	528	44.7902	1.25067	0.53276	1978.4	0.971978	78.3333
220	112	934	194	69.7184	1.89859	1.24078	4741.25	1.05671	86.3333
561	285	636	226	19.7434	0.493478	0.410607	1664.76	0.973623	81.5
561	285	5000	5000	64.9984	1.61002	0.701377	3566.42	0.892249	71.3333
220	112	1135	53	12.4372	0.332343	1.0389	4415.43	0.87004	69.8333
230	62	533	52	20.3193	0.519347	0.629444	2329.61	0.978549	83.1667
561	285	242	69	14.7488	0.381787	1.07511	4683.19	1.06129	86.3333
220	112	81	22	38.4342	1.04707	1.10117	4806.61	1.19972	95
220	112	5	5	7.61861	0.226297	0.663036	1984.01	1.16664	93.6667
220	112	5000	893	40.8973	1.00831	1.02289	5785.08	0.903966	71
263	134	23	12	37.5406	0.987834	1.79668	7854.25	1.28619	103.667
561	285	4600	779	50.4083	1.26423	1.39709	5170.72	1.01385	86.1667
220	112	2093	1445	84.6151	2.04602	0.738465	4214.6	0.940084	74.3333
220	112	1126	110	17.1581	0.489505	1.17524	4030.72	0.951926	77
561	285	1282	296	20.9432	0.555529	0.53422	2300.14	0.973544	78.6667
320	163	1829	266	31.5217	0.838204	1.26995	4953.59	1.01446	83.3333
220	112	4002	1005	35.3239	0.966054	0.69319	2689.37	0.88964	72.5
320	163	4998	3264	68.9364	1.82385	0.796421	3377.35	0.907303	73.5
561	285	687	74	11.9754	0.305433	0.681718	3253.07	0.929845	74.5
561	285	135	60	19.0696	0.53843	1.04965	3196.04	1.14965	96.6667
585	158	5000	583	41.8449	1.24263	1.04185	2718.06	0.987157	83.5
320	163	46	259	20.7874	0.553053	0.154588	560.11	0.962459	79.3333
200	102	3178	798	58.13	1.57759	1.32632	4021.83	0.954702	76.8333
274	139	5000	1394	33.9832	0.822758	1.29099	5572.21	0.842257	70.3333
320	163	177	55	22.4662	0.541293	1.23638	6320.63	1.10848	88.8333
320	163	4046	922	51.9534	1.38093	1.02253	4027.87	0.965708	78.5
220	112	24	31	21.6267	0.578653	0.327904	1455.39	1.11117	89.3333
383	195	55	19	51.3529	1.16378	0.825115	4611.08	1.24637	102
285	77	54	14	11.9754	0.333642	0.538398	1375.31	1.04343	91.1667
320	163	529	202	25.2138	0.712783	0.45371	1541.22	1.0073	83.1667
320	163	2273	557	53.9751	1.42239	0.853749	3648.07	1.00115	81
274	139	4031	957	48.7058	1.34513	2.46316	8723.51	0.961977	79.6667
561	285	5000	797	27.7739	0.680535	1.04095	4767.29	0.922354	76.3333
585	297	2752	202	16.1462	0.394442	0.968303	4931.04	0.911236	73.5
320	163	2032	479	84.1466	2.00962	1.68459	7628.16	1.02911	84.8333
220	112	2202	263	28.8413	0.749914	1.34279	5737.75	0.964072	78
230	62	2384	242	46.3477	1.43687	1.38975	3332.26	0.995989	83.8333
320	163	14	16	15.767	0.474845	0.914607	2904.94	1.21808	97.8333
320	163	5000	5000	58.5615	1.63924	2.15707	6700.86	0.847282	70
220	112	2452	445	37.2057	0.941181	0.82306	3849.57	0.949805	77
561	285	5000	1939	69.3203	1.71102	3.21325	16463.6	0.985222	78.6667
220	112	190	49	34.9435	0.897082	0.849932	3684.39	1.12461	92.3333
220	112	5000	1144	50.5221	1.19942	1.2585	7294.51	0.909833	72.3333
561	285	5000	992	39.812	0.881712	0.841335	5431.97	0.951282	76
561	285	973	289	18.8854	0.557009	0.464998	1473	0.977419	79.3333
220	112	712	173	25.555	0.695748	0.562408	2084.73	0.98236	80.6667
220	112	17	15	11.8159	0.297782	1.71239	8433.82	1.11562	89.6667
561	285	5000	3071	46.8003	1.17656	0.875207	4284.42	0.904	72.6667
220	112	1976	306	33.263	0.924721	1.96189	7110.44	0.992763	80.3333
320	163	238	54	41.1964	1.06362	1.1573	5542.15	1.16102	92.1667
318	162	529	106	35.7485	1.00748	0.993659	3771.41	1.10119	89.3333
334	90	64	36	42.9557	1.32035	0.324378	665.338	1.14111	99.6667
320	163	1154	215	66.6776	1.69256	1.25539	5567.5	1.07291	87.8333
220	112	45	27	20.4563	0.561366	0.538606	2123.43	1.12473	90.6667
200	102	314	72	26.7802	0.778504	0.7889	1618.84	1.07038	89.3333
561	285	3164	389	20.9354	0.581418	0.874493	3076.26	0.957504	78.6667
561	285	4002	1970	26.756	0.803907	0.401469	1103.71	0.886491	73
585	158	770	334	27.5879	0.708194	0.306269	902.465	0.966612	85.3333
320	163	2746	3552	66.2624	1.54233	0.451113	2458.29	0.896911	73
561	285	5000	2106	35.8153	0.9965	0.701906	2413.49	0.910226	75
561	285	1958	336	33.1638	0.898682	1.01604	4002.3	1.04567	85
220	112	925	186	39.5778	1.06224	0.825522	3731.6	1.03102	81.1667
320	163	5000	812	25.4217	0.706311	1.09461	4164.89	0.872103	70
230	62	4430	501	39.1271	0.899656	0.719348	3200.57	0.884242	75.1667
200	102	172	13	9.4125	0.240599	0.755757	2514.23	0.903981	73
220	112	180	43	34.0166	0.910987	1.15486	4583.8	1.14348	92.8333
561	285	5000	1743	36.8875	0.902277	1.44875	5742.99	0.910255	77.1667
561	285	373	95	33.0525	0.879794	1.19783	4863.99	1.15402	93.3333
320	163	58	27	41.1607	1.05823	0.562077	2327.97	1.1987	99.1667
320	163	2587	439	37.7796	1.12445	1.8976	5163.65	1.01303	84.3333
220	112	3808	499	39.7154	0.893539	1.33615	7026.57	0.935433	77.3333
220	112	48	19	14.9446	0.335114	0.989722	5932.13	1.07321	86.1667
561	285	2508	180	14.9113	0.386293	1.02635	4403.36	0.913504	74.5
320	163	232	64	19.5381	0.500627	0.734151	3596.82	1.05796	83.6667
320	163	5000	561	22.0672	0.587538	0.8107	3067.57	0.855913	70.6667
320	163	3492	1162	43.9205	1.24269	0.670762	2412.64	0.941297	76.3333
561	285	5000	3111	52.9892	1.18534	0.597655	3239.95	0.907763	74.6667
561	285	5	5	2.42974	0.0692524	0.330942	1022.53	0.872445	72.5
561	285	175	237	49.0451	1.35305	0.295109	1181.27	1.09539	88
220	112	26	17	16.7752	0.440372	0.764666	3193.78	1.14409	93
561	285	3766	834	72.3434	1.53258	0.997914	6144.29	1.01603	83
200	102	976	152	38.791	0.892582	1.49372	6730.42	1.03404	82
220	112	38	41	20.3877	0.606993	0.333811	1010.3	1.09229	89.3333
320	163	320	91	29.8493	0.730651	0.675964	3239.29	1.08098	88
320	163	5000	5000	84.483	2.43629	1.32404	3968.47	0.829382	69.3333
274	139	3166	3639	107.938	2.69543	1.07708	5105.07	0.910415	72.6667
561	285	3010	320	19.3638	0.492333	0.799064	3871.42	0.930117	74.3333
320	163	375	93	79.809	2.0729	0.777528	3386.92	1.11865	91
214	109	2763	1812	76.7572	1.81845	0.733273	3603.57	0.918731	75.6667
263	134	28	12	40.3335	1.03107	0.928942	4300.09	1.26137	101.667
200	102	2978	986	70.6807	1.77328	2.34153	8236.03	0.954981	77
220	112	468	27	9.68567	0.28346	1.07036	3250.77	0.899723	74.3333
561	285	2220	848	43.4807	0.965784	0.48931	3140.02	0.978614	78.3333
320	163	83	37	10.9838	0.271021	0.261027	1177.1	0.893759	73.5
220	112	53	12	77.0066	1.6278	0.921951	6643	1.23604	97.6667
320	163	256	75	28.1393	0.72744	1.78048	8334.34	1.12943	90
200	102	429	155	35.8476	0.917714	2.6622	8229.24
200	102	4045	409	27.84	0.719209	1.55507	5204.92	0.90364	72.8333
200	102	3027	357	27.3195	0.661534	2.38979	7647.43	0.910528	75.8333
220	112	1162	283	23.6454	0.654695	0.500232	2002.34	0.925277	74.3333
561	285	2009	1421	24.046	0.602565	0.287896	1475.08	0.85372	68.1667
230	62	1285	110	36.5448	0.972469	1.74109	6564.65	1.03205	86
220	112	1337	1972	62.814	1.41662	0.382852	2423.75	0.904976	72
220	112	1646	311	42.1875	1.08002	0.88574	4069.07	0.994255	80.1667
220	112	4427	805	39.4202	1.1215	1.13931	3684.39	0.927601	76.5
220	112	306	73	35.2186	0.763977	0.778355	4861.77	1.07514	87
220	112	1016	237	40.4808	0.844517	0.626354	4734.76	0.985927	77.8333
263	134	11	10	27.5467	0.744801	0.666648	2727.69	1.26278	102
230	62	2843	236	28.1603	0.874701	0.884686	2220.2	0.941735	78.6667
585	158	43	20	25.9298	0.560932	0.59935	3718.42	1.18892	97
220	112	661	557	36.3271	1.15275	0.371164	897.49	0.965789	79.5
220	112	270	73	30.9734	0.817744	0.688455	3102.48	1.08073	86.6667
220	112	1181	234	55.9684	1.29661	0.949708	5058.69	1.02959	83.6667
230	62	697	38	17.0218	0.418239	0.992174	4940.05	0.954529	77.8333
220	112	4706	1288	53.7694	1.26662	0.916935	4996.73	0.907927	73.5
220	112	2905	437	37.8927	0.956213	1.08021	4819.79	0.954615	78
220	112	458	98	34.5801	0.762677	0.77121	4397.33	1.04879	86.1667
561	285	5000	714	24.7567	0.572738	0.625235	3452.24	0.886628	72.1667
220	112	2064	515	80.1003	1.83804	1.88125	9627.27	1.00083	82.5
220	112	339	98	28.7553	0.725855	0.581249	2781.27	1.04009	84
561	285	5000	1100	58.4904	1.27655	1.28451	6902.61	0.98826	82
220	112	156	68	44.0426	1.13374	0.493116	2197.55	1.10646	89.6667
220	112	2840	332	32.4775	0.754213	1.16628	6502.03	0.940316	75.8333
220	112	959	860	34.4255	0.909823	0.3347	1485.56	0.905931	72.8333
220	112	3127	242	23.8939	0.516633	2.11727	14637.4	0.882005	69.6667
585	158	661	136	25.9589	0.666537	0.465586	1710.12	1.02823	87.5
220	112	46	20	39.0416	0.922079	0.666753	3923.81	1.19484	94.6667
220	112	5000	4775	90.9172	2.07601	1.19307	6448.84	0.869207	71
230	117	142	205	70.4847	1.37562	0.299364	1257.14	0	0
274	139	5000	5000	67.0874	1.38354	1.60833	10294.8	0.730518	59
220	112	546	90	26.8762	0.618079	1.10939	6005.68	1.0327	84.3333
220	112	874	227	50.645	1.29893	0.716132	2749	1.03044	86.3333
274	139	865	203	39.3314	1.07533	1.85694	6849.27	0	0
320	163	181	78	23.1734	0.618699	0.499474	2023.7	1.0699	87.3333
230	117	299	180	81.7148	2.06017	0.463032	2095.08	0	0
220	112	2761	254	20.048	0.549512	0.822909	2780.29	0.881361	73.5
320	163	1000	167	31.7817	0.820117	1.19855	5590.41	1.05179	84.6667
220	112	969	160	45.6375	0.960351	1.64784	11004.6	1.04762	83.8333
220	112	2358	472	50.5221	1.21791	0.967116	4706.76	0.975344	79.8333
220	112	27	34	23.087	0.606079	0.324647	1271.45	1.10906	91.8333
220	112	1870	692	91.4076	1.9758	0.941251	6005.68	0.979748	79
320	163	38	22	14.3945	0.331894	0.680327	3518.8	1.08565	89.3333
561	285	5000	1106	33.1143	0.831008	1.21124	5929.42	0.934262	75.1667
320	163	588	127	41.1464	1.01598	0.83736	3596.82	1.08556	90
561	285	5000	2452	72.3057	1.75098	0.95682	4415.43	0.954626	78.8333
320	163	5000	724	38.1197	0.863571	1.61013	9592.19	0.933181	75
320	163	1808	497	49.207	1.24499	0.69079	3022.33	0.999675	80.1667
320	163	69	26	33.7131	0.960215	0.760298	2440.1	1.20496	99.5
561	285	5000	3933	55.0057	1.18419	1.01535	6627.86	0.88596	71.1667
220	112	4032	296	19.8729	0.468976	0.670381	3684.39	0.789597	63.3333
585	158	2925	282	36.8875	0.818278	0.774198	3962.86	0.996222	83.3333
561	285	3931	628	41.5482	1.07279	1.18633	5246.79	1.01468	82.3333
320	163	3180	385	24.0101	0.634662	0.813761	3297.09	0.920853	75.1667
200	102	1821	330	38.3663	1.00902	2.32649	7846.28	0.993814	80
334	90	4048	275	38.4629	0.851626	1.31957	7123.44	0.960868	79.6667
220	112	4256	1238	63.2625	1.65861	1.50976	6855.52	0.936432	75
230	62	5000	1905	52.116	1.29219	2.03144	8176.1	0.838419	70.8333
561	285	2989	475	41.983	1.05377	1.30573	6200.63	1.03672	83.8333
220	112	1000	150	33.7761	0.797578	1.32528	7565.75	1.02672	81.8333
220	112	2725	342	32.0678	0.830592	1.36487	5680.43	0.957687	78.5
220	112	12	8	9.56327	0.235176	0.982073	4866.21	1.07672	87.1667
320	163	1042	259	80.0309	1.94056	0.917542	4533.87	1.05947	86.5
561	285	5000	5000	47.2163	1.30176	0.367862	1244.75	0.853597	71.1667
230	62	171	23	49.0281	1.33591	0.74403	2141.53	1.14757	99.1667
561	285	3770	875	35.4826	0.996234	0.687551	2362.81	0.977877	79.8333
220	112	2852	450	40.9399	1.10764	1.4409	5945.68	0.973764	77.8333
220	112	4597	616	33.7509	0.887601	1.83689	7442.47	0.920853	75.1667
52	27	47	14	49.4982	1.05445	2.21032	16924.4	1.15488	90.3333
230	117	839	169	51.6747	1.34671	1.18928	5537.09	0	0
561	285	752	159	51.7016	1.36271	0.87154	3876.91	1.12148	89.3333
230	117	573	152	117.293	2.7097	2.7022	14255.3	0	0
220	112	2946	449	48.3857	1.05612	1.36796	8213.51	0.967826	78.8333
320	163	5000	5000	73.6607	1.95212	1.31324	5402.3	0.876108	71.3333
220	112	300	196	110.9	2.54978	0.547653	3215.09	1.05476	84.3333
561	285	494	154	42.9706	1.18454	0.615245	2310.44	1.11665	90.6667
220	112	417	113	53.0282	1.36979	0.682872	3043.18	1.07972	87.5
220	112	876	211	65.8726	1.75597	0.912858	3678.76	1.04759	84.8333
561	285	15	40	19.5235	0.53754	0.287218	1017.21	1.16427	96.3333
561	285	5000	2649	36.3678	1.00224	1.90125	6531.86	0.895844	74.5
561	285	2099	379	53.8815	1.35822	1.10717	4947.61	1.06503	87
585	158	98	21	10.3265	0.305898	0.815167	2312.07	1.06	88.5
561	285	1411	207	17.658	0.485016	0.776017	3059.41	0.978809	78.8333
230	62	426	49	58.0556	1.53416	0.857992	3385.89	1.10039	91
220	112	4133	829	44.8602	1.17584	1.05721	4333.63	0.930927	76.5
585	158	19	10	10.4825	0.240233	0.618105	3035.64	1.08229	90.5
585	297	2500	817	51.4868	1.31659	0.620661	2787.04	1.01108	81.8333
220	112	1945	267	21.4417	0.548744	0.587687	2434.04	0.878373	72.6667
561	285	1145	243	29.0901	0.707354	0.747829	3347.69	1.04016	86.3333
220	112	864	148	51.5583	1.28154	1.56434	7727.83	1.07	86.6667
220	112	330	75	25.7658	0.733501	1.73417	5523.52	1.09257	90.3333
275	74	27	5	55.823	1.34006	1.23041	5716.07	1.29508	107.667
220	112	506	96	37.3309	1.0032	0.99634	4036.84	1.08011	88.1667
220	112	5000	809	29.2207	0.790134	0.976373	3816.93	0.864147	70.3333
220	112	710	75	19.8766	0.425137	0.879596	5293.73	0.947139	77.6667
220	112	1163	1121	151.19	3.5556	1.78773	10352.6	0.962927	77.1667
220	112	727	127	31.5688	0.839821	1.7052	7470.92	1.05603	84.3333
200	102	660	140	41.8086	1.17444	1.13416	2602.72	0	0
220	112	1084	140	21.5059	0.629	1.08853	3422.09	0.988487	80.3333
230	62	5000	810	59.0513	1.48789	1.21861	5250.38	0.915152	75.8333
220	112	5000	1083	43.4656	1.01907	1.00663	5361.89	0.890128	72.3333
671	341	80	39	46.5573	1.0584	0.594958	3401.53	1.22658	100
220	112	165	47	25.0729	0.628782	1.45539	7288.85	1.11457	89.3333
561	285	673	341	93.0075	2.00521	0.517628	3252.93	1.07623	87
220	112	1758	960	120.7	2.70842	1.35254	8306.32	0.969184	77.5
220	112	3454	579	30.4459	0.773625	0.721217	3441.56	0.892401	71.5
230	62	924	86	16.1605	0.419767	0.398003	1342.66	0.844952	72.3333
220	112	5000	525	21.053	0.547347	0.94805	3975.76	0.781779	64
220	112	250	52	36.2594	1.1054	1.01921	3096.51	1.13214	90.6667
220	112	615	98	22.5503	0.563346	0.82464	3827.77	0.99788	81
561	285	1188	378	41.0039	1.04002	0.56707	2421.13	1.04482	86
585	158	1292	159	36.8325	0.929086	0.725757	3117.44	1.05742	87.6667
220	112	2284	469	51.5583	1.35951	2.16396	9773.45	0.996366	79.1667
561	285	2914	1274	122.557	2.60434	2.73098	17202.7	1.01376	82.5
220	112	548	154	58.6021	1.30553	2.98823	17746	1.09036	88.3333
263	134	26	12	35.7352	0.94771	1.15753	5188.38	1.26954	101
220	112	5000	1300	51.4511	1.33483	1.23305	5131.8	0.912955	74.8333
220	112	1561	313	36.395	0.987052	0.775263	3007.79	0.983717	80.1667
220	112	4948	1026	58.4193	1.26993	1.3126	7881.16	0.924857	75.3333
561	285	493	102	64.5376	1.61006	0.87797	4143.88	1.15176	94
220	112	1042	222	32.5747	0.899422	0.700983	2660.56	0.999362	81
561	285	741	197	27.3112	0.724889	0.660597	2636.15	1.06109	86.8333
220	112	192	49	22.2575	0.588362	0.862854	3603.89	1.07944	87.6667
585	297	2058	501	47.4298	1.18083	0.717856	3461.14	1.03728	83.6667
230	62	1280	185	43.8063	1.13158	0.654603	2610.11	0.992942	82.6667
220	112	5	5	3.8265	0.0949784	0.374918	1810.35	0.942953	76.6667
561	285	375	332	44.2494	1.08086	0.34028	1523.28	1.06024	88
220	112	3317	368	29.7937	0.752528	1.43198	6021.68	0.933113	77
561	285	5000	1372	58.0858	1.67847	1.1444	3456.23	0.989017	82.5
220	112	3187	1819	83.8405	1.87496	0.851509	4831.45	0.920812	75.1667
230	62	190	35	67.2353	1.50121	0.565358	3098.71	1.11848	92.5
561	285	992	530	52.973	1.22302	0.443089	2480.21	1.03437	84
220	112	514	98	40.4316	1.0697	0.981651	4162.85	1.08218	87.6667
220	112	13	13	18.3982	0.433042	0.723961	4325.72	1.17783	93.1667
585	158	687	38	10.4827	0.300341	1.00113	2957.03	0.950569	80.3333
220	112	2010	368	56.7902	1.28117	1.14158	7282.19	0.998413	79.3333
220	112	1682	220	32.272	0.778262	1.3064	6756.48	0.987332	80
220	112	3074	392	34.31	0.778395	0.9949	6346.53	0.929196	73.8333
220	112	5000	1051	32.3203	0.923956	0.963311	3115.23	0.875058	72.1667
561	285	5000	4276	104.438	2.50252	2.35104	12251.9	0.941214	76.1667
220	112	241	55	27.857	0.799848	1.3455	3841.36	1.11835	94.1667
320	163	269	66	16.3756	0.407871	0.55688	2240.72	0.994265	83.3333
220	112	3500	4391	84.924	2.0683	0.756738	3545.59	0.878136	72.3333
220	112	225	48	41.1322	1.04843	1.38359	6806.06	1.14573	91.3333
220	112	249	99	28.003	0.731494	0.473324	2074.38	1.0398	84.5
220	112	241	109	22.9495	0.646582	0.413357	1420.52	1.01258	82.6667
220	112	912	248	91.6935	2.48118	1.37358	4864.67	1.04341	86.3333
561	285	233	75	17	0.436011	0.999992	3838.64	1.08415	90.8333
220	112	453	97	32.0439	0.768029	0.769787	4005.47	1.0501	85
585	158	174	34	15.4346	0.379372	0.695999	3261.01	1.06024	87.3333
220	112	1246	825	80.3649	2.11042	0.655739	2591.67	0.973666	80.5
561	285	413	78	134.596	2.91667	1.09076	7598.29	1.15144	90.8333
220	112	622	169	40.9541	0.982162	0.618512	3272.59	1.03032	83.1667
561	285	578	432	22.3658	0.575257	0.294721	1293.6	0.953906	77.5
585	158	5000	1178	53.9938	1.3871	0.77355	3136.28	0.947739	79.3333
585	297	5000	5000	69.0083	1.70082	0.619314	3059.41	0.856003	69.3333
220	112	1418	318	61.2427	1.30321	0.847296	6245.85	1.00784	79.3333
220	112	199	72	15.917	0.426254	0.375343	1409.49	0.953619	78.8333
220	112	53	38	31.4864	0.825838	0.410556	1714.77	1.13075	91.8333
220	112	335	71	37.6951	0.881104	1.56076	8126.14	1.10946	90.5
220	112	4512	250	21.483	0.477878	0.967445	6459.27	0.82004	64.6667
220	112	1083	284	38.9107	0.949288	0.611259	3409.98	0.986915	78.3333
561	285	1155	243	29.583	0.68557	0.73905	4247.38	1.03534	83
220	112	3157	380	24.6368	0.705118	2.16956	6806.06	0.926936	76.8333
561	285	2609	709	48.8243	1.22713	0.679304	3201.44	1.01276	82
220	112	89	29	19.7213	0.421859	0.862634	6043.73	1.07358	85.8333
220	112	329	112	34.5671	0.93293	0.540968	2198.56	1.05658	84.6667
610	164	2151	5000	99.5194	2.14679	0.33146	1935.13	0.885731	73
220	112	2640	542	47.7435	1.39669	1.17837	3789.96	0.977839	79.1667
585	158	1205	173	45.1491	1.3679	0.68154	1667.41	1.07391	91
561	285	4727	711	28.7983	0.734506	0.789736	3768.52	0.948566	76
334	90	3202	1031	107.92	2.71722	1.63578	7650.54	0.954263	78
274	139	357	161	26.0463	0.639071	0.399652	1620.78	0.995526	84
220	112	602	172	25.1445	0.637519	0.481656	1994.88	0.967016	80
320	163	3221	4537	54.9389	1.49728	0.449169	1717.81	0.879153	71.1667
220	112	1753	345	46.1231	1.27257	0.98503	3596.23	1.00125	82.5
320	163	1028	173	26.0755	0.788198	1.02476	2948.66	1.04009	85
220	112	3317	1001	72.2179	1.78903	1.36023	6719.54	0.953916	77.3333
220	112	1093	757	74.3284	1.71401	0.525766	2903.02	0.971754	79.1667
220	112	5000	773	36.2323	0.858782	1.2734	6585.81	0.887801	72
334	90	5000	3059	56.5935	1.5374	2.16127	6950.61	0.855838	72.6667
320	163	3768	547	32.4169	0.889419	1.02769	3960.29	0.956543	77.3333
320	163	291	62	15.7711	0.435553	1.23215	4818.22	1.04505	83.5
220	112	2142	3742	77.8174	1.87889	0.51096	2662.03	0.886462	71.1667
220	112	883	241	67.212	1.67319	0.79526	3982.82	1.03763	83.1667
220	112	1264	226	46.4121	1.24985	1.08408	3949.07	1.03104	85.6667
320	163	4453	612	32.9785	0.889792	1.80181	6781.22	0.956363	78.3333
220	112	524	96	19.2197	0.555447	1.94181	5999.71	1.02688	85.3333
220	112	1109	184	43.8519	1.06146	1.68323	8903.67	1.04481	83.6667
220	112	34	10	62.4663	1.46034	0.724168	4290.29	1.24425	99.3333
561	285	2006	490	59.9599	1.56485	0.817434	3340.58	1.05006	86.3333
561	285	1088	479	31.8768	0.825199	0.432168	1940.62	1.00374	81.1667
220	112	96	16	8.34737	0.251506	0.446681	1188.09	0.914274	76.3333
320	163	2475	438	64.0801	1.36457	1.41791	9614.01	1.01988	81.3333
320	163	5000	1374	34.8133	0.764004	1.26218	7464.1	0.839595	68.5
220	112	541	78	20.0405	0.502595	0.98636	4497.02	0.99919	80.6667
334	90	1349	156	54.9389	1.45308	0.885679	2558.8	1.04728	92
561	285	5000	3771	35.3239	0.98555	0.743019	2907.14	0.861832	69.5
102	52	5	5	59.123	1.27413	0.529592	2843.94	1.50366	125.667
671	341	24	21	32.5139	0.867874	0.548764	2274.68	1.27074	103.333
220	112	754	121	24.046	0.635364	1.73784	7613.93	1.02264	81.6667
561	285	791	144	60.367	1.60706	1.08971	4218.38	1.13273	93.1667
220	112	2096	276	30.8234	0.808124	1.13247	5142.36	0.969728	77.6667
220	112	1396	290	28.6482	0.806411	0.650538	2269.84	0.961937	78.3333
220	112	481	399	26.9969	0.752357	0.307596	1057.66	0.934499	77
220	112	5000	3556	55.823	1.43837	1.03764	4969.13	0.852393	67.6667
220	112	3924	585	28.5947	0.857454	0.924087	2696.65	0.911478	75
220	112	5000	3109	49.4553	1.37546	1.5664	5507.14	0.854545	69.5
561	285	5000	1614	45.0474	1.18815	0.800388	3169.82	0.95194	78
220	112	4068	422	26.9969	0.729924	1.46542	4996.45	0.912725	76
220	112	317	129	25.3554	0.665582	0.430042	1646.27	1.00259	83.3333
220	112	4559	490	24.1991	0.662775	0.886449	3261.01	0.867599	71.3333
230	62	654	69	32.0558	0.876792	1.99907	6086.69	1.06882	91.5
220	112	5000	787	23.1302	0.658996	0.878705	2907.14	0.813473	66.8333
220	112	906	263	75.2889	1.86902	0.832769	4266.83	1.03532	82.6667
561	285	257	23	7.71187	0.21569	0.70719	2643.64	0.912739	74.1667
220	112	5000	1040	47.1262	1.14465	1.58601	8015.52	0.912965	73.6667
263	134	30	6	113.469	2.60786	0.762279	4606.19	1.26092	100.333
561	285	54	58	20.2701	0.4943	0.390654	1989.39	1.1168	90
220	112	690	119	49.8343	1.31299	1.45866	6148.18	1.08519	88
220	112	189	50	15.5163	0.433803	0.555649	1910.59	1.00327	82.6667
230	62	5000	424	40.1311	1.06971	1.54231	5949.22	0.927566	77
220	112	3300	891	34.5156	0.868323	0.590612	2236.29	0.881881	74.6667
230	62	185	29	28.0135	0.759187	0.736832	2643.64	1.10447	92
220	112	5000	1824	47.7187	1.22378	0.897802	3833.2	0.878784	72.3333
561	285	968	274	26.6663	0.669299	2.58611	11210.6	1.06574	87.5
220	112	3551	474	37.1086	0.90904	1.34002	6721.08	0.942754	76.1667
220	112	1356	199	33.3127	0.890865	1.4257	5776.45	1.01682	83
561	285	2376	2722	67.1071	1.68341	0.427585	2077.32	0.953769	76.8333
585	297	499	5000	233.676	5.54684	0.52929	2653.03	0.854761	70.1667
230	62	131	21	31.3223	0.871801	0.767223	2843.94	1.14067	93.6667
561	285	1414	308	36.2458	1.01981	0.777694	2613.82	1.05992	87.6667
220	112	937	50	12.7091	0.324575	1.58252	6358.15	0.887965	73.8333
561	285	5000	1752	28.435	0.666563	0.906849	4685.79	0.832574	68
561	285	5000	4023	31.1357	0.799408	1.16324	4981.63	0.80022	65.8333
561	285	5000	1617	52.4789	1.11806	0.829634	5977.82	0.944961	74.6667
220	112	3194	920	31.5571	0.835609	0.552049	2376.9	0.872477	70.5
220	112	2336	337	32.1517	0.856185	1.97992	7900.98	0.973513	79.6667
561	285	462	89	50.0944	1.3356	1.31476	5804.23	1.17021	93.3333
561	285	5000	2594	48.8582	1.29032	1.07708	4298.14	0.92667	75.8333
220	112	3409	353	27.2806	0.704883	1.23955	5714.76	0.920031	73.5
561	285	5000	801	30.118	0.788238	1.90575	8331.03	0.965674	77.8333
220	112	4215	719	31.5571	0.812913	0.760558	2919.53	0.883233	74
220	112	299	52	17.2437	0.448227	0.958537	3811.52	1.01703	84
220	112	4840	2014	75.5244	1.81261	1.33116	7260.6	0.911038	73.1667
220	112	1061	240	45.7009	1.14013	2.62897	14141.2	1.04374	82.6667
220	112	2212	193	18.5638	0.499068	0.774441	3147.42	0.879786	70.5
220	112	741	127	45.8279	1.3545	1.45012	4931.81	1.08092	85.8333
561	285	522	149	25.9008	0.8017	0.692914	1906.53	1.09645	88.3333
220	112	606	107	41.0609	1.13582	1.17086	4022.55	1.08223	90
220	112	5	5	3.33153	0.107022	0.608852	1351.74	0.960472	79.3333
220	112	448	79	47.3722	1.40887	1.28178	4133.47	1.11299	89.1667
220	112	147	33	44.2571	1.1248	1.12398	5163.55	1.16996	94.3333
230	62	1856	122	25.6027	0.732635	1.19395	3663.14	0.974469	81.8333
220	112	386	76	23.4958	0.583257	1.57612	7786.3	1.05394	84.6667
561	285	5000	1331	45.7167	1.0664	1.03153	5664.08	0.954429	77.1667
220	112	5000	2336	44.8368	1.12454	1.44624	6561.78	0.844777	68.8333
220	112	2506	962	48.3857	1.33365	0.664019	2300.63	0.935683	77
220	112	935	164	40.5792	0.876201	0.886988	5923.45	1.02263	81.8333
220	112	5000	1122	51.8544	1.29613	1.92715	9362.59	0.924804	74.5
220	112	1191	141	21.5863	0.57587	1.52694	5956.02	0.977937	80.3333
220	112	135	47	21.0609	0.566809	0.602499	2302.26	1.07099	87.5
200	54	82	19	32.4775	1.01389	0.526465	806.317	1.14137	98
220	112	5000	264	21.195	0.548649	0.749296	3468.51	0.873404	70.3333
220	112	987	123	22.6769	0.559761	0.952129	5425.97	0.973101	76.3333
561	285	122	152	44.9537	1.07486	0.230131	1190.2	1.11075	90
585	158	3353	2007	51.0459	1.22675	0.374753	1767.64	0.91046	75.5
220	112	3544	336	25.1949	0.663228	1.31318	5784.38	0.910996	73.3333
220	112	277	63	39.9504	1.02895	0.857084	4042.56	1.11201	88.5
230	117	251	89	23.6719	0.653636	0.75059	2805.88	0	0
585	158	5000	4978	63.9135	1.54564	0.527116	2201.68	0.874471	74
200	102	190	35	72.6579	1.66452	1.79819	7389.45	1.17054	95
561	285	4241	917	59.8871	1.41625	0.971294	4943.09	1.00552	82.3333
561	285	58	39	24.0371	0.557426	0.819401	4603.03	1.18982	95.8333
561	285	1594	415	85.7532	1.83031	0.818613	5002.16	1.06365	87
220	112	92	40	27.1586	0.71295	0.562387	2358.44	1.11566	91.3333
220	112	2888	222	19.4217	0.544575	1.43716	4309.94	0.901574	76
220	112	5000	907	41.0324	0.942567	1.87405	9517.85	0.896574	74
220	112	924	471	36.8187	0.864698	0.403498	2037.93	0.939192	77
585	158	1029	35	9.83333	0.278391	0.793205	2727.42	0.894044	73.6667
230	62	351	44	41.6348	1.12702	0.761754	2375.22	1.09678	94.3333
220	112	5000	5000	86.0812	1.91032	1.22465	5226.44	0.783454	62.5
220	112	2370	388	31.5335	0.905719	0.883243	2723.55	0.955439	78.6667
220	112	97	27	49.0621	1.07941	1.65157	10826.4	1.20048	95.6667
67	19	96	28	44.142	0.958592	0.413509	1893.06	1.02921	88.3333
585	158	2499	551	58.4193	1.51595	0.588232	2254.6	1.00432	84.1667
220	112	34	94	23.0096	0.591034	0.204677	905.227	1.0229	83
230	117	793	164	53.9283	1.15937	1.37137	9881.21	0	0
220	112	912	105	19.1409	0.515534	1.15303	4611.45	0.974324	79
220	112	652	116	36.3136	0.928534	1.04008	5178.9	1.06007	84.3333
220	112	3097	592	45.2197	1.21693	1.09414	4309.94	0.959557	78
220	112	204	62	55.8036	1.49853	0.620206	2424.57	1.12011	91.1667
585	158	519	87	34.8003	0.840455	2.25637	10324.3	1.13582	94.6667
561	285	2045	697	45.0161	0.944615	0.516217	3616.69	0.990197	79.1667
220	112	4204	481	28.4457	0.773971	1.76006	7430.07	0.916771	73
220	112	65	20	38.8961	0.997087	1.096	5391.37	1.20846	96.3333
230	62	2501	285	38.3625	1.08775	0.801686	2756.58	0.956749	78.8333
220	112	3842	346	25.2509	0.618983	1.8711	5742.24	0.896229	73
230	62	998	78	25.073	0.691432	0.971962	2840.42	1.00353	86.5
320	163	3587	862	45.4807	1.0379	0.712901	2245.03	0.94137	79
220	112	3484	459	38.1906	0.891706	1.28622	4641.04	0.941786	75.3333
220	112	1797	152	26.8101	0.589365	2.08804	8451.79	0.957322	77.6667
220	112	5000	217	47.1384	1.20847	1.228	5661.49	1.05772	84.5
220	112	3457	276	27.9213	0.582474	1.32264	5936.99	0.895246	72.5
220	112	901	101	17.9877	0.500773	1.08475	3776.55	0.968389	78.5
220	112	2963	170	37.8164	0.776529	1.04142	5160.01	0.991703	79
561	285	5000	1233	54.2595	1.3552	2.60551	13517	1.00828	79.6667
274	139	2743	312	26.6595	0.66939	1.77132	5342.33	0.953274	77.1667
561	285	4441	651	34.0842	0.73913	0.833022	3475.89	0.958054	77.3333
230	62	2200	236	27.3655	0.786316	0.632079	1838.81	0.923733	78.3333
220	112	5000	210	22.7489	0.568078	2.00029	6263	0.982871	78.3333
220	112	203	30	39.2579	0.983074	1.5774	4754.8	1.20109	96.3333
320	163	5000	755	49.0317	1.21166	0.99682	2784.08	0.966866	80
220	112	1874	106	19.0102	0.488652	0.576272	1705.68	0.926054	74.5
220	112	59	77	62.367	1.37028	3.00371	12625.6	1.08781	87
220	112	5000	1025	63.6186	1.31538	1.52309	7101.48	0.948442	76.6667
320	163	5000	1135	53.4498	1.20038	2.47673	10602.5	0.93574	74
276	140	1327	137	29.7408	0.745418	0.981557	2702.39	1.02204	84
320	163	62	40	27.3215	0.655835	1.68171	5653.73	1.18834	95.3333
320	163	413	88	33.0982	0.861964	1.07727	2919.53	1.10853	90.5
561	285	5000	1215	35.8844	0.789108	0.95251	4319.79	0.913839	72.1667
561	285	2113	817	30.639	0.762638	0.431318	1083.08	0.947896	79.8333
220	112	6	9	11.6346	0.292883	0.470743	1266.83	1.11917	92.3333
399	108	37	9	50.384	1.3588	2.61424	5936.99	1.30084	108.333
561	285	3152	966	46.4848	1.09373	0.597466	2052.43	0.981383	79.8333
220	112	2622	1301	87.9764	2.20899	2.55882	7262.26	0.953855	78
220	112	3306	660	60.7583	1.3102	1.97931	8513.81	0.966202	77.6667
561	285	5000	5000	55.5568	1.49881	1.9984	4662.3	0.893257	73.3333
220	112	4703	1185	46.2193	1.06968	3.0729	11563.9	0.906963	72.6667
561	285	2773	415	30.4426	0.796713	1.08532	2794.96	1.0145	82
561	285	5000	1030	38.5339	0.994406	1.22094	3395.5	0.967745	78.6667
220	112	104	23	58.9901	1.40035	1.00741	3747.2	1.19578	95.1667
220	112	5000	1557	46.1036	1.03315	0.874114	3586.04	0.864256	68.8333
287	78	845	75	30.9362	0.690125	0.992721	3199.17	1.03041	86.8333
220	112	89	32	21.6816	0.495445	1.2553	4796.26	1.11364	89
220	112	1855	256	23.521	0.651622	0.749512	1639.28	0.930585	75.6667
561	285	1384	244	52.0524	1.13861	1.22591	4705.1	1.09141	89.3333
320	163	166	31	69.9621	1.66268	1.1147	3901.76	1.19823	96.3333
561	285	4214	622	32.9124	0.801321	1.94972	5433.41	0.993901	83
334	90	315	49	23.5541	0.58221	0.619999	1297.74	1.05075	92.8333
585	158	5000	1119	34.387	0.959176	0.497391	1559.9	0.911942	77
561	285	5000	771	27.3877	0.643196	0.917955	4889.55	0.910638	74
220	112	826	175	61.8114	1.66709	2.2417	8631.3	1.07439	87.6667
220	112	2527	215	20.7936	0.564498	1.43435	6194.7	0.91816	72.8333
349	94	1238	136	54.3567	1.58421	1.0349	3055.07	0	0
320	163	193	48	48.1101	1.21811	0.823175	4174.28	1.16416	92.3333
220	112	880	35	42.5357	1.11796	0.921573	3937.89	1.17831	95.3333
220	112	326	67	30.0957	0.92245	1.4419	4347.51	1.11408	89.3333
610	164	722	95	33.4864	0.891735	0.770975	2673.8	1.09865	92.8333
263	134	8	10	24.5402	0.73316	1.02345	3082.27	1.24846	101.167
220	112	5000	775	68.0721	1.61755	1.59906	9059.6	0.975302	77.8333
220	112	3211	33	57.8606	1.61715	0.353006	1270.42	1.17601	96.1667
561	285	1229	479	51.2664	1.16842	0.516113	2764.41	1.03698	84.8333
561	285	5000	5000	45.0835	1.1266	1.17326	5055	0.828665	68.6667
561	285	967	125	15.583	0.393493	0.971877	4409.53	0.979778	79.8333
220	112	5000	192	39.6889	0.963107	0.724438	3890.7	1.0484	83.6667
220	112	500	114	47.0372	1.04401	2.28677	14876.9	1.09453	87.3333
561	285	3004	488	48.1532	1.09557	1.23048	7014.41	1.03658	84
561	285	5000	1063	35.3687	0.811687	1.30554	6824.74	0.934552	76.8333
220	112	1544	202	32.8595	0.755585	1.39428	7189.63	0.991972	81.6667
220	112	4609	1556	44.818	1.24263	0.776979	2733.22	0.893387	73.3333
200	102	1274	216	39.2368	1.13596	1.80786	4002.63	1.03144	85
230	62	1861	162	40.5652	1.12681	1.78542	6719.54	1.01334	83
320	163	5000	2384	66.1383	1.70755	1.225	5475.77	0.919772	74.5
320	163	5000	621	47.3074	1.22204	1.26046	5391.37	1.007	82.1667
320	163	815	143	49.2251	1.20586	1.28692	6454.73	1.09335	88.3333
220	112	4082	5000	69.4132	1.9673	0.714297	2417.7	0.853223	69.8333
320	163	906	292	41.5053	1.13445	0.576269	2265.02	1.03002	83
561	285	5000	4563	59.4565	1.47703	1.15751	5538.68	0.910083	73.5
220	112	5000	375	35.6256	0.901253	0.642602	2806.88	0.967496	79.3333
320	163	2737	1278	78.2015	2.04191	0.853445	4025.4	0.967511	77
220	112	3378	810	44.1729	1.01624	0.728386	3784.59	0.914176	75.1667
561	285	5000	5000	59.3396	1.52953	1.26094	5576.77	0.831875	67.5
175	20	660	26	63.063	1.65531	1.53043	3757.85	1.07503	97.8333
220	112	1858	545	60.4004	1.64433	0.88434	3513.06	0.986265	79.3333
561	285	643	27	6.25055	0.174939	0.802005	2860.11	0.950372	77.8333
220	112	2482	571	45.1805	0.959896	0.688639	4437.82	0.933327	75.6667
220	112	416	83	33.1648	0.853702	0.967403	4056.92	1.07902	88.3333
220	112	163	47	32.7145	0.822012	1.7532	9026.55	1.14707	90.6667
220	112	5000	1586	47.0297	1.31228	1.20518	4337.3	0.896787	73.3333
561	285	142	66	18.5124	0.514239	0.69323	2383.65	1.11857	92.1667
220	112	2773	848	48.3865	1.15228	0.677754	3586.04	0.928313	75
561	285	5000	1047	43.0104	1.10635	1.42638	7027.25	0.980812	78.1667
587	298	215	521	42.4672	1.1777	0.245996	919.591	0	0
230	62	1561	164	44.2124	1.17601	0.891552	3045.34	1.00536	85.1667
561	285	5000	1777	42.119	1.01527	0.5533	2839.91	0.928561	75.3333
220	112	833	142	26.6595	0.743866	0.854377	3096.51	1.01336	82
561	285	2027	522	49.4017	1.08486	0.662305	4341.56	1.0248	81.6667
220	112	226	107	33.8111	0.881477	0.444337	1849.27	1.05529	86.5
220	112	5000	5000	94.2698	2.39289	1.22619	6040.97	0.834422	66.5
561	285	5000	1650	29.9568	0.7124	0.506162	2698.56	0.868303	70
561	285	574	343	50.8552	1.31	0.419917	1712.95	1.06705	88.5
220	112	2628	589	66.8764	1.53082	1.2232	7004.81	0.978559	79.1667
220	112	5000	478	24.6292	0.699076	1.5537	5101.41	0.889433	73.1667
220	112	2642	583	47.2905	1.27594	0.941418	3543.08	0.964503	79
561	285	1381	703	26.5846	0.650437	0.350885	1720.25	0.933013	75.6667
220	112	5000	1259	50.0245	1.14018	1.32337	7464.1	0.895942	72.6667
220	112	2909	524	44.4425	1.13314	1.0524	4983.91	0.961047	77.1667
220	112	743	188	32.8727	0.786819	0.583832	2617.53	0.995345	82.6667
220	112	989	159	26.3611	0.756176	0.899306	2880.47	1.00632	82.3333
220	112	4174	464	25.5471	0.721728	2.00535	6688.91	0.907639	75.1667
220	112	5000	488	26.2131	0.697606	1.36836	5337.45	0.884607	72.6667
561	285	1967	448	64.248	1.53744	0.858494	4827.03	1.05541	84.3333
220	112	128	34	46.7016	1.25077	0.737448	3333.48	1.16016	91.3333
220	112	5	8	12.2139	0.351958	0.94047	3240.26	1.22483	99
220	112	3731	1058	58.3077	1.60204	1.19046	4552.84	0.942979	76.3333
220	112	6	9	9.37348	0.270113	0.422093	1154.86	1.08883	92.3333
220	112	2177	267	24.888	0.697819	0.952908	3357.2	0.943198	77.3333
220	112	5	5	2.80494	0.0790355	1.41384	5202.62	0.869322	70.1667
220	112	2323	297	28.3512	0.769076	1.03857	4276.59	0.953097	75.5
220	112	639	218	35.9277	0.938633	3.48175	16673.7	1.05184	83.5
220	112	3656	841	51.8478	1.39064	1.14051	4666.56	0.947082	76.5
561	285	2601	618	61.3265	1.50627	0.849591	4071.33	1.03389	84.1667
220	112	1725	267	26.2131	0.824198	0.882209	1992.21	0.972859	81
561	285	19	27	17.2475	0.433141	0.515435	2058.26	1.17969	99
220	112	4002	1280	70.667	1.74565	1.96589	9579.57	0.940281	76.3333
220	112	56	8	7.74023	0.207658	0.970572	3352.44	0.956332	80.1667
220	112	1385	744	78.7493	2.03527	0.7125	3309.93	0.977597	78
561	285	3090	462	29.9568	0.821612	1.06305	4065.56	1.00886	81.6667
220	112	741	177	61.7229	1.6546	0.856694	3120.75	1.05712	87.8333
49	25	1245	245	39.5689	1.0648	1.00673	4246.3	0.893825	71.8333
320	163	3238	660	54.7767	1.22147	0.942922	3752.52	0.978566	78.3333
220	112	2023	244	24.9281	0.592001	2.34639	8089.09	0.936725	75.5
220	112	1006	195	36.071	0.850065	0.748407	2929.9	1.00299	79.8333
561	285	4301	713	49.7745	1.18376	1.25397	4290.29	1.01402	81.8333
219	112	5000	1109	49.331	1.19123	0.856725	2537.12	0.917329	75.8333
220	112	574	75	17.327	0.467291	1.25416	4684.37	0.991733	81.3333
320	163	1315	304	42.1416	0.904414	2.70573	9912.85	1.03847	86.3333
220	112	156	44	33.4864	0.819169	0.814337	2453.97	1.12607	92
320	163	5000	1553	31.8193	0.793737	1.3783	3849.54	0.837951	69.3333
220	112	1670	412	45.7747	1.26057	4.1218	8936.27	1.01288	83.3333
557	283	5000	2288	50.186	1.30588	0.892466	2328.53	0.923018	75.8333
230	117	5	5	4.65342	0.107762	2.2849	8052.22	0	0
220	112	5000	781	36	0.915278	1.34462	3591.13	0.899853	74.3333
320	163	1276	235	34.2904	0.853665	0.82573	2489.02	1.02031	81.8333
274	139	6	6	8.65753	0.188326	1.31121	5768.54	1.08141	85.8333
557	283	512	437	57.2323	1.4145	1.15275	3580.96	1.00261	81.5
561	285	5000	3389	33.4864	0.696606	0.850516	3647.59	0.814941	66.5
220	112	258	57	26.2236	0.534461	1.4131	7001.61	1.06493	84.8333
561	285	400	184	17.8867	0.461881	0.365842	961.796	0.979029	80.3333
320	163	5000	543	25.8052	0.534538	1.02552	4730.97	0.855921	69
220	112	3871	722	51.5517	1.22709	1.27838	4765.68	0.946898	74.6667
230	62	5000	769	20.5237	0.544524	1.56621	3228.8	0.721046	61.6667
220	112	5000	956	49.8101	1.22161	1.56288	4628.34	0.92741	76.6667
561	285	7	23	11.868	0.31009	1.77048	4645.29	1.22182	99.3333
220	112	1047	177	49.2604	1.29062	1.37598	3456.23	1.05427	87.1667
220	112	526	100	27.7869	0.596488	0.718796	2973.86	1.00653	82
220	112	1961	95	61.5134	1.36567	1.55322	6005.19	1.10564	89.6667
320	163	388	81	42.3989	0.999576	1.38248	4943.09	1.13176	90.6667
220	112	643	100	25.2408	0.622546	1.26561	3699.69	1.02701	84.3333
320	163	561	438	121.095	2.47591	0.530542	2492.55	1.03272	83
320	163	1865	750	48.8215	1.15893	0.534189	1898.43	0.966422	77.5
320	163	5000	730	29.0786	0.712697	1.91833	5510.91	0.894641	74.3333
320	163	5000	5000	77.9221	1.7147	3.05546	12745.9	0.853328	68.3333
230	62	5000	167	43.7402	1.00288	0.706894	2260.2	0.981587	82.1667
561	285	5000	562	20.2531	0.573125	1.75679	3533.04	0.926582	75.6667
320	163	5000	5000	53.5072	1.39538	1.72363	4231.89	0.823346	68.3333
334	90	5000	355	25.3119	0.664752	1.11464	2098.79	0.879384	77
220	112	5000	1373	47.8696	1.11386	1.06635	3663.14	0.907625	73.8333
561	285	2124	494	32.4003	0.713689	0.576616	2229.96	0.97658	79.8333
200	102	536	94	40.4718	0.833222	1.4088	7731.39	1.06721	85
276	140	830	132	25.2408	0.606898	0.865437	2723.55	1.0061	82.3333
585	158	5000	1363	62.8602	1.50347	1.16965	3232.23	0.960038	81.6667
320	163	5000	579	45.7256	1.08195	2.43819	8405.58	1.02564	82.6667
220	112	265	53	48.1791	1.0912	1.22115	4579.96	1.13481	92.5
320	163	3992	531	38.2453	0.875678	1.24052	4208.75	0.958966	78.8333
320	163	16	18	17.6439	0.428469	0.598922	1992.21	1.16965	94
220	112	5000	1572	28.7762	0.762646	0.866013	2012.08	0.789503	65.5
220	112	2599	474	68.9426	1.33236	1.50205	7349.05	0.986677	80.5
320	163	2441	434	36.2976	1.00778	2.20496	7935.35	1.00889	82.5
220	112	2513	668	68.6717	1.69453	1.14277	5810.86	0.975637	78
334	90	2248	201	51.8478	1.13289	1.10077	3681.37	1.01688	85.8333
220	112	1058	198	52.5392	1.09802	2.10701	9405.46	1.04837	84.3333
393	200	2300	421	37.2454	0.945404	0.836088	2426.28	1.00148	80.8333
320	163	222	57	17.9696	0.422907	0.674561	2147.72	1.0277	84.6667
320	163	266	79	19.6712	0.512518	0.581156	1453.12	1.03534	85.6667
320	163	2271	273	25.4958	0.583134	2.03015	7046.54	0.958546	78.5
561	285	4744	840	54.7669	1.35544	1.43481	4494.96	1.0132	81.5
320	163	4162	1266	73.295	1.80691	1.20772	3926.73	0.962744	77.6667
230	62	591	123	80.1286	2.03605	3.68798	8200.73	1.07432	92.3333
561	285	1923	318	32.7672	0.801015	1.54136	4759.15	1.04871	85.3333
320	163	4230	2426	52.9546	1.14679	0.514768	2121.98	0.883994	71.5
320	163	1548	315	75.1549	1.83034	1.30728	4660.17	1.05007	82.6667
220	112	293	55	97.1477	1.99274	2.03748	10750	1.14616	89.6667
220	112	1394	233	47.6985	1.1339	1.14182	3663.14	1.02293	84.1667
200	102	2605	944	37.8094	0.847972	0.497005	2249.82	0.867796	69.8333
561	285	5000	4289	41.2313	0.980626	1.19122	3596.23	0.846185	70.3333
200	102	1728	181	28.3056	0.612648	1.49686	7863.17	0.952539	75.3333
220	112	2269	234	21.9624	0.597229	0.915274	2138.6	0.917851	75.3333
320	163	1485	409	53.3924	1.19814	0.665495	2689.01	1.01027	80.6667
334	90	960	100	79.1308	1.94662	1.19449	3328.76	1.08371	90.5
220	112	58	28	31.9218	0.728868	0.59467	2360.11	1.15009	91.3333
320	163	1190	287	126.026	2.42473	1.6717	8560.61	1.05912	85.8333
561	285	4458	621	34.0842	0.846009	1.14752	3431.81	0.988136	80.8333
320	163	2318	277	26.6274	0.671337	1.39088	3806.12	0.976436	80.3333
200	102	878	174	58.3297	1.50936	1.04056	3823.79	1.05101	82.6667
220	112	5000	1653	35.4541	0.969819	1.51956	3609	0.845334	68.5
220	112	83	31	23.7252	0.634737	0.810265	3098.71	1.13446	93.8333
561	285	3436	598	40.139	1.00543	0.93431	4532.08	1.00932	82
220	112	1307	346	87.4112	2.15784	1.30336	6245.85	1.02365	83.3333
220	112	513	90	23.0899	0.654699	1.39687	5421.01	1.04998	84
561	285	368	418	28.2034	0.809657	0.288768	865.51	1.0177	85
561	285	263	17	7.93405	0.196074	0.576499	2729.35	0.86933	70.3333
230	62	231	28	36.9797	0.9589	1.54795	6200.36	1.14195	95
220	112	938	127	19.2797	0.504578	0.668364	2955.99	0.936629	76
220	112	74	22	43.2574	1.14354	0.801593	3565.76	1.19471	95.1667
220	112	310	146	29.5144	0.751431	0.414043	1741.11	1.01188	83.5
220	112	2287	628	75.2896	1.88571	1.97177	9800.27	0.98974	79.5
220	112	4578	1465	62.4564	1.66618	1.3522	5274.42	0.925185	76
561	285	300	89	26.8856	0.723713	1.01427	4016.85	1.14111	93.5
220	112	167	53	27.7869	0.640257	0.639458	3731.3	1.07868	86.3333
220	112	271	56	98.9731	2.50938	1.03682	4294.21	1.12416	93
220	112	1993	367	51.7181	1.38713	1.33456	5127.11	1.00582	82.8333
561	285	760	207	34.8323	0.791264	0.652127	3251.77	1.06705	89
561	285	1290	269	29.102	0.641932	0.68129	3791.3	1.01424	83.6667
220	112	1711	343	52.8978	1.39053	1.05915	5006.73	1.00819	79.5
220	112	1901	324	51.5333	1.27249	1.44399	7982.62	1.01046	79.6667
561	285	1405	273	65.1513	1.66854	1.03184	5052.69	1.09054	87
585	158	1477	146	34.2766	0.972987	1.00322	2767.35	1.07238	91.6667
220	112	168	53	21.1989	0.565118	0.611766	2610.11	1.05856	85.6667
220	112	5000	815	45.1724	1.03377	1.74799	9362.59	0.920028	75.3333
220	112	4374	1501	75.5866	1.76295	1.93008	10925.1	0.93027	74.8333
561	285	2265	1310	99.5773	2.07594	0.623625	4270.73	1.00008	80.3333
585	158	731	155	45.6275	0.990701	0.497552	2817.84	1.06339	88.1667
230	62	648	397	98.7607	2.14592	0.463953	2291.67	0.985481	83.6667
585	158	5000	1417	21.6468	0.659892	1.09079	2689.01	0.781833	66.1667
220	112	4091	667	47.3582	1.04861	1.94793	12712.5	0.941154	74.5
220	112	1956	337	31.1985	0.693461	0.643448	3678.76	0.919107	75
220	112	2575	466	51.9221	1.25983	1.22281	6332.05	0.980964	78.8333
220	112	787	335	98.3374	2.61101	0.89372	3915.61	1.02472	81.8333
220	112	5000	1480	38.2864	1.06803	0.917011	3376.3	0.873604	71.1667
220	112	726	143	62.5012	1.60888	1.04337	4128.76	1.07166	89.3333
220	112	212	34	11.6797	0.276391	0.320454	1534.66	0.834186	69
220	112	933	201	78.2015	2.06428	1.36691	5988.76	1.05603	84.3333
220	112	2882	442	43.6307	1.0689	1.40461	6834.1	0.97083	78.8333
220	112	248	59	25.0991	0.612285	1.50031	8420.96	1.0872	85.5
561	285	5000	5000	50.1142	1.27333	1.02934	4104.31	0.804042	67
200	102	124	39	21.0589	0.472871	1.65784	7224.87	1.08459	87.8333
220	112	632	2092	45.5948	1.15573	0.253596	1159.38	0.888857	72.3333
220	112	144	102	28.2374	0.758864	0.356935	1290.4	1.04376	86.8333
220	112	2749	1001	74.8863	1.68517	0.892496	5607.43	0.949859	75.6667
220	112	2309	206	21.1223	0.536683	0.892398	4018.27	0.898866	73.3333
220	112	2623	859	51.6071	1.29534	0.711993	3381.09	0.939847	76
220	112	5000	5000	48.5253	1.23302	0.506476	2416.84	0.794632	63.6667
220	112	5000	1917	49.1283	1.1914	1.13527	6005.19	0.869978	69.6667
220	112	2189	4518	40.7034	1.08935	0.337093	1314.87	0.817653	67.1667
220	112	561	55	15.3464	0.379095	1.2587	6597.85	0.955448	76
220	112	5000	3699	81.9123	1.74388	0.981438	5643.41	0.871388	72
220	112	2128	318	31.5517	0.799717	0.86258	4054.05	0.952392	76.5
220	112	156	30	56.2976	1.48098	1.11163	4866.9	1.17689	94.8333
220	112	515	379	45.6111	1.19713	0.389192	1675.71	0.99417	80.3333
220	112	5000	2395	32.8331	0.967176	3.06033	10146.6	0.819349	66
220	112	1354	219	47.9039	1.07559	1.65249	10493.4	1.03119	82
220	112	4554	801	41.6169	1.10494	1.18026	4952.13	0.926233	75.1667
220	112	674	147	40.5869	0.88471	0.721035	4136.31	1.03115	85.1667
585	158	1872	183	28.5342	0.793672	0.837061	3009.92	1.0299	85
220	112	4700	2110	64.294	1.73062	1.05981	3919.78	0.904954	75
220	112	3547	1132	71.3022	1.80515	1.3708	6314.72	0.94676	77.5
220	112	585	166	76.2661	1.97346	0.798434	3558.18	1.06327	86.1667
220	112	5000	690	35.8123	0.91383	1.5746	7288.85	0.912728	73.5
561	285	970	208	35.6542	0.925336	0.856019	3785.93	1.08452	88
220	112	1971	435	55.3384	1.35741	0.942607	5371.7	0.98956	77.8333
561	285	5	5	1.62536	0.0424248	0.730149	2690.92	1.14968	96.1667
220	112	5000	1146	36.1874	0.844016	0.695689	3937.89	0.851539	68.5
585	158	969	210	32.5309	0.77905	0.449299	2339.28	1.01456	82.8333
585	158	2643	514	48.5166	1.31189	0.583859	1897.76	0.999833	84.6667
220	112	565	123	30.7131	0.878569	0.746965	2566.98	1.04525	85.3333
200	102	1268	234	39.3705	1.12694	0.944924	2036.48	1.0128	84.6667
220	112	4158	5000	76.4575	2.04792	0.690527	2193.89	0.830124	70.5
220	112	3422	498	40.9665	0.976645	1.24218	5994.23	0.948223	78.3333
220	112	1087	208	24.2948	0.70141	0.645541	1848.62	0.966426	81.3333
561	285	1749	311	48.4732	1.21763	1.10103	5440.86	1.0745	85.6667
220	112	46	51	18.3088	0.435755	0.274063	1225.74	1.0071	84.3333
220	112	5000	698	27.8652	0.772511	0.937877	3249.47	0.872899	71.8333
561	285	5000	5000	45.9553	1.2338	0.672458	2449.62	0.842487	70
561	285	3378	991	96.8006	2.05708	1.03974	6834.1	1.01478	82
220	112	3164	792	66.3517	1.66178	1.53655	6277.32	0.965925	81.3333
220	112	797	133	37.1389	0.90005	1.08917	5674.44	1.04632	84
561	285	678	157	62.4341	1.59868	0.782976	3342.95	1.12278	92.5
220	112	3074	540	45.6275	1.24223	1.56619	5805.56	0.972211	79.8333
220	112	1505	253	54.7963	1.18015	1.17813	7749.04	1.02004	81.8333
220	112	845	125	24.9682	0.654818	1.50138	6366.86	1.0184	82.5
263	134	12	5	48.7778	1.22654	1.33192	6640.19	1.33813	107.333
220	112	74	61	19.926	0.531733	0.3272	1349	1.03299	83.3333
220	112	5	8	9.90282	0.299582	1.80992	5450.81	1.14357	92.6667
220	112	124	30	46.9783	1.20792	0.870574	3773.87	1.1713	96.1667
220	112	5000	151	45.9553	1.12666	0.848662	4321.77	1.06303	85.6667
230	62	417	59	26.864	0.78973	0.617651	1397.55	1.04347	91.3333
220	112	1545	777	53.7472	1.36897	0.546152	2528.15	0.954122	76.8333
585	158	1156	118	28.6376	0.798156	1.44866	4577.87	1.08307	91.3333
220	112	1880	1429	89.1974	2.08862	0.700788	3822.34	0.942167	75.6667
230	117	830	169	43.8107	1.22447	1.44069	5445.83	0	0
393	200	2942	484	39.7102	0.917314	0.916304	4945.35	0.987299	80.6667
561	285	5000	780	20.7352	0.541183	0.818012	3378.69	0.921953	75.6667
220	112	1743	274	33.9747	0.729378	0.75268	4988.47	0.94853	76
585	297	5000	4944	37.9045	1.03241	0.479632	2006.39	0.861041	68.6667
220	112	803	242	39.7458	0.933567	0.555541	2984.42	0.997744	80.3333
561	285	615	851	59.627	1.43358	0.315875	1596.83	1.01842	82.8333
220	112	3593	1832	90.5486	2.18913	1.56377	7382.7	0.927871	76.3333
561	285	560	526	33.0317	0.850604	0.311832	1215.35	1.00513	84
220	112	360	94	22.4942	0.602995	2.36509	10362.1	1.05812	84.5
220	112	14	18	25.3425	0.649967	0.372979	1779.81	1.17323	94
220	112	2931	2618	81.0083	1.79246	0.65128	4204.9	0.899129	71.8333
220	112	3456	871	35.8988	0.985634	0.688318	2604.57	0.904314	73.3333
220	112	328	145	31.4884	0.803082	0.436297	1979.54	1.02069	83.1667
561	285	293	147	28.0902	0.760864	0.462106	1806.51	1.0894	88.6667
220	112	87	31	27.201	0.709938	1.4133	5837.47	1.16564	95.6667
220	112	5000	3761	63.4366	1.7126	1.01944	3665.74	0.868347	71.6667
561	285	4396	1885	78.2995	1.94639	0.814943	4087.46	0.97576	78.8333
561	285	5000	3750	48.3	1.11676	1.38422	8200.73	0.880998	70.3333
220	112	450	191	48.6818	1.25632	0.503582	2375.22	1.04081	82.8333
220	112	980	151	22.8636	0.615157	2.06962	8903.67	0.998726	80
561	285	244	66	57.0074	1.36238	0.721391	3816.93	1.17898	95.1667
220	112	5000	766	36.9797	0.870222	1.08674	6110.37	0.890635	71.1667
220	112	643	1576	156.252	3.86357	0.781287	4228.02	0.948501	75.6667
220	112	2646	403	31.1484	0.854596	2.23862	8960.81	0.960545	77.1667
220	112	3192	631	48.7167	1.24684	1.09363	5298.57	0.957228	76.5
220	112	225	52	33.6619	0.831985	1.047	4979.36	1.11846	91.1667
220	112	3628	643	43.8656	1.03201	0.975084	4813.82	0.933606	76.8333
561	285	1426	855	163.538	3.82334	2.22816	12197.6	1.024	82.8333
561	285	949	174	50.6009	1.21665	1.42779	7065.88	1.12304	91.6667
220	112	2659	556	42.3989	1.02868	0.792634	3915.61	0.944484	76.5
220	112	357	33	11.3495	0.313288	1.19843	4615.67	0.944614	75.6667
220	112	1280	231	55.1407	1.21714	1.04292	6531.86	1.02742	82.5
220	112	147	62	19.7425	0.49923	0.430064	2099.53	1.01482	81
220	112	148	84	26.7993	0.736407	0.402333	1537.39	1.05467	86.1667
220	112	931	165	55.1407	1.52533	1.41254	5236	1.06558	87.5
220	112	1921	355	58.1826	1.34902	1.84319	10919.9	1.01252	80.8333
561	285	4241	1019	82.3975	1.77865	1.15201	6969.69	1.01003	82.1667
220	112	107	33	46.0376	0.991926	0.743697	5259.98	1.1586	91.1667
561	285	5000	2762	35.3402	0.800429	1.31337	7532.61	0.838683	67.8333
220	112	3051	992	57.9954	1.43682	0.821949	4185.74	0.93894	75.6667
220	112	345	68	56.7021	1.43002	1.96903	8977.19	1.13544	91.6667
220	112	1751	5000	52.3139	1.26649	0.302947	1690.03	0.806331	64
561	285	260	111	30.8492	0.768719	0.546882	2573.36	1.11443	91
220	112	5000	610	28.2034	0.754057	2.12294	8155.9	0.890464	73.3333
220	112	5000	4745	40.8932	1.05765	1.25012	4607.24	0.773098	64.6667
561	285	683	1303	29.4907	0.770618	0.232231	909.513	0.927906	76.8333
220	112	536	5000	108.433	2.6173	0.328106	1735.57	0.886628	71
230	62	1795	92	18.5944	0.492707	0.734528	2666.23	0.894366	75
220	112	347	175	28.8225	0.692207	0.379632	1833.61	0.984277	80.6667
220	112	3165	597	35.7116	0.953397	0.815376	2992.89	0.92791	77
230	62	273	37	30.0775	0.842025	0.747318	2172.22	1.09147	93.3333
220	112	3644	484	36.6765	0.908205	1.37294	6928.42	0.941089	75.3333
220	112	1430	250	52.4264	1.24555	1.15228	6830.98	1.02454	80.5
220	112	5000	1200	51.6996	1.26984	1.96582	9711.13	0.917734	74.3333
220	112	2505	1008	63.3119	1.47143	0.705997	4080	0.940845	76
561	285	5000	1948	36.6765	0.985378	1.22012	4662.3	0.913909	74.6667
220	112	415	514	26.5846	0.662154	0.249944	1179.69	0.892408	72.8333
220	112	880	160	36.3757	0.951562	0.895069	3996.96	1.03343	83
220	112	2962	349	31.5517	0.760598	1.13494	5523.52	0.936656	76.6667
561	285	1214	531	33.8928	0.907415	0.446727	1796.29	1.00737	82.3333
561	285	1801	361	60.0018	1.7094	2.11009	7362.48	1.08678	88.5
220	112	5000	714	36.2262	0.876594	1.28527	6902.72	0.89931	71.8333
220	112	2118	623	48.4905	1.2146	0.692368	3070.56	0.955686	78.1667
220	112	1234	438	24.1099	0.596893	0.37563	1655.72	0.864123	71.3333
274	139	3072	509	35.5112	0.798063	2.62694	16010.6	0.953386	76.3333
200	54	1354	236	35.8555	0.996863	0.547838	1453.28	0.951885	78.3333
220	112	268	78	27.201	0.680338	0.601094	2854.46	1.05114	85
220	112	368	187	26.5526	0.712355	0.380263	1509.32	0.983356	79.8333
220	112	286	136	25.2916	0.677709	0.398669	1471.06	1.00189	82.3333
200	102	1133	196	26.7231	0.613794	0.608298	2483.07	0.93446	75.3333
230	62	1906	98	19.1214	0.520341	0.813871	2407.52	0.906754	78
318	162	325	85	46.1697	0.97578	0.74039	5031.98	1.11171	89.3333
220	112	5000	1659	40.8713	1.07189	0.834474	3538.72	0.866156	70.1667
220	112	1961	422	48.0843	1.17077	0.841328	4156.16	0.979465	79.3333
318	162	744	258	36.9797	0.973979	0.524167	1817.55	1.02565	85.5
318	162	1558	280	43.0104	1.12751	0.989718	4377.24	1.03449	84.1667
320	163	5000	852	40.8713	0.96865	1.0039	5031.98	0.932266	76.6667
318	162	1381	607	35.8123	0.938655	0.450713	1725.4	0.958475	79.6667
320	163	451	108	43.7558	1.1361	0.760973	3391.24	1.10235	89.3333
318	162	5000	776	31.9603	0.888939	1.29145	4307.67	0.927764	76.8333
220	112	965	201	44.1492	1.18822	0.841101	3550.7	1.03398	82.3333
220	112	209	34	90.9221	2.30556	1.59361	7920.69	1.163	93.3333
320	163	732	89	15.4928	0.420592	1.20714	4849.92	0.981236	79.5
561	285	4393	1036	76.8279	1.89414	1.51223	7516.22	1.01347	81.3333
220	112	745	128	47.3244	1.28843	1.4938	5537.21	1.07978	88.6667
220	112	1623	129	20.9026	0.458225	0.872765	5200.6	0.899164	73.3333
230	62	627	193	26.3399	0.665186	0.331526	1292.06	0.917783	77.3333
220	112	283	100	52.671	1.30387	0.558142	2795.28	1.08546	87
561	285	5000	5000	77.5464	1.67835	1.42713	9036.94	0.751428	60.6667
610	164	5000	332	24.2508	0.703773	1.17896	2944.58	0.964002	83
220	112	5000	3141	50.6734	1.20205	1.08092	6863.33	0.834369	65.3333
220	112	672	1494	32.4003	0.787845	0.23535	1053.55	0.847392	70.3333
220	112	324	66	24.1778	0.64417	1.23718	4789.25	1.07396	88.3333
220	112	750	112	25.5061	0.637514	1.07115	4859.92	1.01455	82.6667
220	112	5000	611	34.8744	0.817512	1.54913	8004.53	0.901955	73.6667
220	112	793	144	38.4581	1.0878	0.98055	2940.6	1.05381	88.8333
220	112	5000	3320	51.8943	1.35226	0.940821	4050.8	0.849789	68.6667
230	62	1063	96	32.102	0.891748	0.924726	2770.84	1.02062	86.8333
220	112	1866	388	50.7915	1.39771	1.033	3630.77	0.999842	82.8333
220	112	2071	568	35.0995	0.890191	0.575193	2744.75	0.923604	74
220	112	523	123	28.5801	0.758743	2.35856	10310.5	1.06286	85.6667
220	112	1713	463	60.2708	1.42013	0.801533	4438.79	0.988247	79.1667
561	285	2815	870	46.0047	1.13449	0.60214	3180.38	0.992324	78.8333
220	112	5000	1329	50.4291	1.20264	2.01909	9099.21	0.903568	75.5
230	62	579	76	30.676	0.68624	0.57866	2808.54	1.00125	84.5
220	112	5000	3035	37.4661	0.954384	0.718639	3418.85	0.796309	63.8333
230	62	1509	512	47.4856	1.17535	0.446973	1926.3	0.92984	77.6667
220	112	2606	5000	133.743	3.29968	2.02347	10851.2	0.858129	68
585	158	5000	1549	28.6837	0.797388	0.669171	2247.17	0.842534	70.3333
220	112	908	193	60.5195	1.57782	0.96464	4380.25	1.05088	84.1667
219	112	241	92	30.2838	0.675613	0.479584	2619.71	1.0347	85
220	112	3373	2238	57.3657	1.42661	0.602322	2948.56	0.888688	71.5
220	112	5000	4065	43.795	1.12994	0.81267	3804.07	0.80733	64.3333
220	112	43	20	30.7131	0.727085	0.778463	4410.43	1.18623	94.6667
220	112	432	86	39.2579	0.956	0.957309	4587.53	1.08507	88.3333
585	158	2816	667	35.6686	0.936727	0.448239	1523.67	0.949339	81.1667
220	112	841	184	47.6473	1.30759	0.834001	3303.03	1.04582	84.1667
220	112	2858	310	27.0918	0.711852	1.2294	5057.39	0.93547	76.1667
561	285	2537	519	47.6473	1.13588	0.835323	3822.1	1.02984	85.8333
220	112	6	5	7.54889	0.170482	0.320949	1888.92	0.951987	76.6667
561	285	1574	324	51.6903	1.14608	0.848555	5132.02	1.06479	86
220	112	2595	595	48.1618	1.27087	0.89902	4048.06	0.962578	77
220	112	175	36	15.0539	0.381508	1.19522	5879.44	1.02865	82
220	112	384	126	48.6906	1.11283	0.570017	3395.82	1.06175	85.3333
561	285	4274	614	28.0676	0.631734	0.704661	3567.53	0.929528	77.3333
220	112	764	521	109.369	2.88243	0.796661	3265.6	1.00191	82.3333
220	112	1087	2233	129.363	2.80321	0.608621	4064.47	0.930987	74.5
230	62	296	47	74.7792	1.81245	0.665822	2500.38	1.1029	95
561	285	5000	5000	118.628	2.7455	1.4384	8718.23	0.890639	70.8333
561	285	3607	962	85.6457	2.1014	1.2691	5681.17	1.01808	84.5
220	112	1754	2923	45.4644	1.09688	0.337096	1640.58	0.849099	69.5
610	164	4678	573	52.464	1.41145	0.902226	2770.8	0.999294	86.1667
561	285	5000	4892	66.2805	1.65907	0.823517	3970.58	0.90917	73.3333
561	285	5000	2641	91.6411	2.28897	1.21798	6053.71	0.961553	77.1667
220	112	356	109	123.569	3.14692	2.60232	10860.3	1.09331	90.3333
220	112	1623	1832	129.41	3.30586	1.51708	7519.67	0.937845	74.6667
561	285	5000	3896	79.6994	2.02876	1.40911	7037.74	0.934841	74.3333
220	112	167	63	40.6742	1.08724	0.543938	2329.42	1.11024	89
220	112	1965	374	46.7853	1.32146	1.11119	3704.34	0.999341	82
220	112	1790	373	64.5246	1.67222	1.6209	7304.48	1.0163	81.5
561	285	5000	5000	83.5859	2.05118	0.659669	3308.66	0.767406	62
220	112	2680	430	41.2609	1.10621	1.26523	5288.21	0.975295	78.5
220	112	427	139	48.7342	1.26223	3.24687	15583.4	1.10187	86.6667
220	112	164	31	61.5024	1.46598	1.3086	6286	1.17934	97.5
220	112	2224	414	63.744	1.39367	1.65266	10577	1.00092	80.6667
220	112	704	369	56.9258	1.4921	0.504886	2069.58	1.008	82.8333
220	112	4966	364	22.4175	0.560493	1.00988	5498.6	0.843275	66.8333
220	112	2477	1706	84.3676	1.89021	0.715348	4426.65	0.926587	74
220	112	1562	1129	112.466	2.91784	2.56279	12651.6	0.96645	76.3333
220	112	186	48	35.726	1.0682	0.766143	2354.3	1.13184	92.3333
220	112	1276	215	48.7342	1.23017	1.26488	5426.74	1.03612	84.5
700	189	191	20	61.5905	1.6759	1.6869	6145.02	1.24768	103.667
561	285	954	2459	109.017	2.59568	0.393094	2062.26	0.977891	79.6667
220	112	5000	5000	81.8683	2.09065	1.22053	6114.43	0.817876	65
200	23	257	105	50.5781	1.11279	0.267735	692.49	0.972834	87.8333
561	285	5000	5000	60.7365	1.46332	0.657537	2812.31	0.838985	70.1667
220	112	1845	538	56.763	1.26138	0.702353	4234.9	0.969376	78.3333
561	285	1042	310	72.538	1.7192	0.678518	3249.45	1.08001	89.3333
220	112	17	17	21.5339	0.567586	1.82142	7890.11	1.23055	99.3333
561	285	5000	5000	93.5638	2.18122	0.927282	5837.94	0.885751	70
220	112	5000	960	45.3182	1.09808	1.25288	6153.39	0.911569	74.5
220	112	858	254	61.5024	1.46259	0.690297	3805.39	1.02908	82.5
220	112	1341	273	31.7809	0.844308	0.686292	2780.62	0.97394	79.5
220	112	1408	783	39.441	1.02734	0.437049	1728.24	0.925263	75.8333
220	112	74	21	45.9883	1.17265	0.821175	3743.9	1.19738	96.6667
220	112	131	31	52.7465	1.34497	0.847767	3865.14	1.17054	94.5
220	112	578	115	44.7219	1.20922	0.910293	3931.4	1.07574	85.3333
220	112	2210	1222	86.7255	2.27203	0.989957	4027.22	0.95203	78.3333
585	297	153	118	22.6895	0.611756	0.380605	1324.67	1.08495	90.8333
240	65	734	90	76.6493	1.99605	0.912388	3295.8	0	0
220	112	1387	207	34.3456	0.825381	1.00366	5035.35	0.996669	81.1667
585	158	5000	1727	58.2868	1.38391	0.749043	3552.75	0.922349	77
220	112	587	111	31.1484	0.732302	0.824008	4426.65	1.03293	83.1667
561	285	82	1823	82.1031	2.10695	0.160261	719.643	1.00902	81.6667
220	112	1016	250	56.4388	1.59277	0.85878	3042.32	1.03414	84
220	112	2699	989	27.7199	0.798335	0.470599	1408.36	0.859837	71.8333
220	112	5000	5000	87.1301	2.11297	1.35484	7166.62	0.753426	60.3333
220	112	1204	247	51.7181	1.35817	0.941928	4442.74	1.02824	81.8333
561	285	5000	1827	29.693	0.64685	0.747697	4354.94	0.820429	67.1667
220	112	2669	371	31.8193	0.869223	1.06979	3876.11	0.954371	78.6667
220	112	1643	703	52.5392	1.37551	0.595083	2514.59	0.960116	78.5
220	112	218	61	60.3032	1.5675	0.661233	2629.32	1.12196	92.6667
220	112	56	23	15.9885	0.394032	1.01699	4873.53	1.09531	89.1667
220	112	2483	5000	136.207	3.25681	1.80382	9391.61	0.878579	71.6667
220	112	1957	374	57.9124	1.46555	1.35104	6398.21	1.00761	80.8333
561	285	5000	2671	122.908	2.61259	1.95977	11015	0.966547	80.1667
220	112	5000	3617	54.2984	1.34309	1.46571	7908.03	0.84005	66.5
220	112	626	484	18.6844	0.497789	0.24568	894.958	0.80638	67
220	112	5000	2130	54.7277	1.26254	0.745576	4588.17	0.873989	69.3333
220	112	5000	3647	50.0425	1.46378	0.943897	3300.47	0.853782	68.1667
220	112	146	37	36.1162	0.904337	1.07899	4962.78	1.15291	94.5
220	112	3196	302	25.65	0.648148	1.28368	6509.47	0.916198	72.6667
220	112	5000	1203	41.7362	0.992405	1.23251	6136.66	0.876858	71.5
220	112	1489	404	44.3234	1.12949	3.18056	13892.6	1.00815	82.6667
220	112	916	246	33.4326	0.913256	0.590856	2329.42	0.993294	80
220	112	5000	1025	42.4596	1.17936	1.58307	5869.81	0.917977	74
220	112	884	169	65.3148	1.6715	1.8784	8726.15	1.0716	85.5
220	112	3526	571	38.7691	0.985115	2.15114	10265	0.948566	76
561	285	5000	990	23.936	0.585595	1.51293	7990.98	0.855958	68
561	285	733	168	30.5161	0.693572	0.839016	4812.02	1.0736	86.8333
561	285	5000	2441	49.2428	1.36915	1.03028	3627.75	0.936753	76.1667
220	112	3707	1121	60.8018	1.5328	1.01608	4825.14	0.935725	75.6667
220	112	3541	1046	64.5246	1.66032	1.1858	4764.23	0.946094	78.6667
220	112	2501	5000	118.416	3.31003	2.40552	8789.72	0.854108	69.6667
220	112	4132	2068	67.9868	1.57818	0.804836	4280.51	0.900155	73.1667
200	102	337	51	34.8464	0.868566	1.37944	4742.67	1.12433	91
561	285	5000	5000	53.4306	1.45705	1.94041	7192.68	0.882906	72.5
220	112	1851	437	51.4319	1.31322	0.848117	3818.89	0.98671	80.5
561	285	5000	2668	38.7275	1.12363	1.638	5439.06	0.910618	73.3333
230	62	74	95	44.2758	1.14176	0.236368	978.973	1.05163	87
220	112	5000	2531	58.2451	1.53718	1.19321	5336.4	0.882171	70.8333
220	112	317	122	61.4364	1.54412	1.29388	6097.81	1.05599	85.5
220	112	5000	1554	84.4885	1.90149	0.74694	4949.29	0.943541	74.5
220	112	5000	1083	46.9615	1.22649	1.18542	4503.62	0.939238	78.1667
220	112	7	13	15.7298	0.416513	0.34629	1490.99	1.14474	92.5
220	112	1931	1103	40.4347	1.09666	0.466636	1866.28	0.908547	73.6667
220	112	2353	481	51.0193	1.2894	2.25833	10246.4	0.992051	80.8333
220	112	3302	2192	50.8006	1.43117	0.600381	2187.12	0.890437	72.6667
220	112	5000	2806	37.5601	1.05523	0.647626	2329.42	0.826941	67
220	112	2918	5000	136.061	3.07381	1.01214	5717.37	0.772843	62.6667
220	112	3595	2216	62.2555	1.57955	0.698119	3072.63	0.897493	73.5
585	158	5000	2341	63.4934	1.49014	0.531009	2759.05	0.914176	75.1667
220	112	220	94	25.2611	0.650805	0.439767	1989.81	1.02679	83
585	158	5000	377	24.5501	0.606456	1.2186	5211.99	0.910727	76.1667
220	112	2632	102	13.9742	0.381048	1.32848	5647.77	0.837614	66
220	112	5000	5000	74.2989	2.10381	2.00736	7657.37	0.855699	68
220	112	4227	1130	69.0909	1.51555	2.1154	12135.3	0.940193	77.1667
585	158	4425	610	46.1532	1.24925	0.742889	2387.88	0.983545	84.1667
220	112	5000	1054	48.1446	1.19832	1.25543	5508.59	0.915921	75.6667
220	112	3490	3421	81.7804	2.321	2.96235	9222.73	0.899657	74.6667
220	112	483	89	52.099	1.07237	1.11613	7643.49	1.09235	87.6667
220	112	2125	268	27.4427	0.668228	0.846303	4721.2	0.93232	74
220	112	1179	261	82	1.97578	1.38115	6670.9	1.04012	85.1667
220	112	398	804	53.5	1.16277	0.272582	1862.32	0.949443	76.1667
561	285	5000	5000	94.2	2.25791	1.00005	5307.43	0.913092	73.6667
561	285	221	293	23.5	0.582966	0.253722	1321.86	0.996491	80
220	112	165	360	45.6744	1.27257	0.258737	959.898	1.00991	82.1667
220	112	200	34	102.032	2.60993	1.37201	5769.48	1.15528	95.3333
561	285	5000	2494	45.1172	1.17684	0.780846	3490.39	0.919772	74.5
220	112	5000	2275	40.246	1.05796	0.769805	2710.63	0.840411	70.8333
220	112	4997	1356	51.3694	1.35833	1.0563	4917.96	0.911724	72.3333
220	112	578	107	73.2118	1.79632	1.19444	6175.76	1.09268	87.8333
220	112	5000	1775	47.9814	1.36985	2.64361	9289.92	0.902002	72.6667
220	112	5000	2263	54.3943	1.45016	2.13621	8922.3	0.886538	72
230	62	151	25	24.1615	0.596311	0.732856	3280.66	1.08836	90.3333
220	112	349	120	21.3078	0.50214	0.389635	1880.21	0.946205	78.1667
220	112	465	86	31.1	0.814805	1.20832	5202.54	1.07667	87
220	112	5	5	5.36141	0.127727	1.36481	6737.81	0.986511	81.3333
220	112	2092	389	25.9172	0.696414	3.1714	12694.5	0.939799	75.5
220	112	1202	498	113.949	2.75397	1.33048	7478.85	1.00438	79.8333
561	285	5	5	2.1666	0.0526738	1.13534	4855.88	1.01435	84.8333
220	112	5000	2658	53.0083	1.42511	1.20143	5044.5	0.870351	70
561	285	973	199	49.5301	1.18785	1.91934	9256.26	1.12228	92
220	112	75	82	72.2143	1.81018	0.333293	1690.11	1.10742	87.8333
220	112	4004	1812	47.0127	1.19305	0.624831	3027.27	0.880066	70.3333
220	112	5000	442	40.7651	1.04303	1.23357	5414.44	0.996986	81
230	117	483	173	54.6699	1.44454	0.597263	2475.71
220	112	2790	491	28.9933	0.702889	0.627597	3417.02	0.886723	70.6667
220	112	4606	1844	78.9206	1.82362	1.35311	8263.81	0.916947	72.8333
220	112	734	127	36.6347	0.924081	1.05256	4228.91	1.05233	87.5
561	285	3623	917	66.8577	1.73369	2.47569	10949.3	1.02906	83.5
220	112	2364	518	60.3757	1.36684	1.00245	5594.22	0.978457	79.5
220	112	3628	844	56.9872	1.49841	1.36529	6395.31	0.953901	75.3333
220	112	1754	189	21.7447	0.545835	0.785561	3618.77	0.914591	74.3333
561	285	4204	1082	68.334	1.72117	1.0053	4561.19	1.00432	81.8333
230	62	5000	1787	82.7125	1.86817	1.45513	6645.99	0.883638	75.3333
220	112	1599	208	29.8629	0.759945	1.25726	5483.37	0.987571	81
220	112	1806	3737	68.6926	1.75084	0.439737	2066.72	0.883919	71
220	112	797	257	53.3827	1.36267	0.626974	2557.59	1.02486	85
220	112	4139	3934	82.3105	1.93664	0.820041	4641.77	0.878473	70.6667
220	112	5000	1882	44.8817	1.20105	0.915914	3097.05	0.8737	73.5
220	112	612	109	52.3711	1.47072	1.2052	4641.77	1.09026	87.3333
220	112	10	8	47.7482	1.16423	1.05918	5767.03	1.25883	99.5
561	285	2338	398	39.7049	1.08407	1.68547	6539.11	1.05939	86.3333
220	112	1303	228	54.5614	1.18093	1.88071	10954.1	1.03826	85
220	112	174	49	31.3558	0.892977	0.746373	2746.5	1.12124	90.5
220	112	121	170	104.172	2.44357	1.84812	10071.1	1.04381	84.5
220	112	3567	1978	76.7018	2.25739	1.6836	4831.59	0.925101	76.3333
220	112	5000	5000	58.6782	1.44994	0.879347	4546.6	0.810697	65.1667
220	112	2356	471	52.9222	1.3755	1.1478	5623.41	0.986301	78
220	112	715	130	46.2719	1.12176	1.01577	5332.39	1.06427	85.3333
275	74	92	11	54.9072	1.60795	0.891526	2420.79	1.21307	103
220	112	1295	213	36.6217	0.888988	0.923802	4530.25	1.00308	82
220	112	31	14	35.4541	0.881491	0.978013	4959.45	1.23561	98
220	112	5000	1952	46.1968	1.2899	1.23723	4552.75	0.879647	71
220	112	180	63	80.7506	2.02338	0.592934	2961.39	1.11929	89
220	112	30	15	13.4403	0.325532	0.887556	4766.75	1.08919	87
561	285	3053	570	64.8023	1.60302	1.63579	8445.16	1.04917	83.6667
585	297	5000	5000	82.4741	1.93927	1.20919	7008.71	0.870002	69.1667
230	62	909	104	86.6085	1.96613	1.16838	5409.79	1.05808	90
220	112	853	139	38.4079	0.916266	1.20402	6370.53	1.04684	84.5
561	285	5000	1570	47.1232	1.2626	1.44394	5463.65	0.962902	79.5
561	285	5000	5000	62.111	1.68074	1.0646	4563.01	0.858243	68.1667
220	112	14	15	26.0652	0.689596	0.430084	1769.24	1.19544	97.3333
561	285	766	189	22.5569	0.624661	0.668281	2368.78	1.04293	85.5
220	112	5	5	1.02822	0.0220731	0.690926	4276.5	0.943949	76.5
220	112	2083	1436	62.6628	1.4811	0.541771	3092.85	0.922169	73.5
214	109	2078	843	80.1553	2.26793	1.24539	4215.31	0.971331	79.5
585	158	751	89	52.2955	1.51703	0.814274	2440.58	1.12146	93.6667
585	158	5000	5000	34.9901	1.02051	0.561727	1446.27	0.737374	63.1667
220	112	5000	4941	60.0497	1.43101	1.25486	5485.84	0.827558	69.5
230	62	1959	549	44.8332	1.1078	0.480073	2022.32	0.916375	76.8333
220	112	5000	5000	76.5496	2.05801	1.32372	5557.95	0.737726	59.3333
220	112	792	439	68.8913	1.55983	0.512427	2594.3	0.999643	83.1667
220	112	2995	1786	103.125	2.42297	1.90538	10226.5	0.934381	75.8333
220	112	5000	1451	43.7302	1.03041	0.875968	5436.65	0.869373	68.3333
220	112	3920	2404	85.044	2.23954	1.9312	8571.6	0.914224	73.5
220	112	5000	68	35.6821	0.826655	1.44575	8770.74	1.15336	91
220	112	3652	5000	95.458	2.3068	0.870787	4469.46	0.868985	70.5
561	285	4584	1939	96.9513	2.50233	1.40611	5676.84	0.981171	80.8333
585	158	1309	329	41.3655	1.07011	0.453112	1654.27	1.01594	85.8333
220	112	2346	366	29.7886	0.79585	0.805064	3212.66	0.93889	76.8333
561	285	4574	2622	106.877	2.53437	1.06881	5157.61	0.964363	79.6667
220	112	17	14	12.0851	0.304891	0.414055	1850.29	1.05279	86
220	112	2915	5000	82.623	2.2711	0.6353	2149.7	0.8476	70.6667
220	112	3347	287	24.5955	0.608251	1.42899	7321.65	0.905904	72.3333
220	112	396	103	56.7922	1.33975	0.701769	3830.03	1.08526	87.8333
220	112	1328	572	98.3969	2.24402	0.885014	5232.48	0.994133	80
200	102	3150	468	41.1867	1.00039	1.71423	5612.1	0.95417	79.1667
561	285	1263	2541	51.639	1.41076	0.303326	1003.25	0.951926	79.6667
223	61	4437	5000	75.126	2.03075	0.673984	2381.68	0.812285	67.8333
220	112	5000	4524	75.8072	1.92967	0.981879	5211.31	0.868134	68.3333
230	62	1931	1226	70.9226	1.66127	0.483571	1624.23	0.907374	80.8333
220	112	2494	1341	81.9695	1.71319	0.713475	5152.97	0.934464	74.3333
585	158	5000	1631	57.6285	1.57113	2.64083	8649.15	0.945921	80
220	112	1776	5000	170.718	3.94773	1.60299	9873.55	0.808976	63.6667
220	112	973	159	26.9524	0.6472	0.736744	3752.84	0.976628	79.3333
220	112	1367	613	112.579	2.81079	1.82053	8645.25	0.995496	80.5
220	112	152	57	40.721	0.923395	0.560629	3722.4	1.10854	86.8333
220	112	5000	2569	65.4606	1.61787	1.13115	5453.81	0.88644	71.5
230	62	335	35	44.9871	1.11343	1.1619	4820.72	1.12225	94.3333
220	112	2998	495	37.3617	0.942208	0.920326	4666.92	0.941414	74.6667
220	112	597	375	74.5317	1.53869	0.466593	3447.6	1.00953	80
230	62	172	48	69.6288	1.66938	0.46151	1690.59	1.10148	96
220	112	455	285	58.6676	1.45545	0.443213	2288.2	1.02409	81.6667
585	158	1806	300	62.5046	1.39742	0.637162	3236.73	1.03874	87
220	112	370	77	51.49	1.31069	0.888458	4437.37	1.10672	88
214	109	1039	186	36.323	0.893609	2.085	10098.4	1.03367	84
220	112	1885	618	58.657	1.59059	0.793832	2987.63	0.976712	80
220	112	4285	2509	84.0672	2.13994	1.99119	9944.95	0.909688	72.3333
561	285	2371	534	45.7734	0.940314	0.689886	3063.6	1.00937	82.5
220	112	212	71	118.544	2.64045	0.702084	4087.87	1.10728	90
320	163	1751	2025	58.7206	1.42221	0.402329	2003.2	0.925913	75.5
220	112	35	19	24.6833	0.624237	1.04966	5008.83	1.19403	95.6667
220	112	4346	4587	87.4726	2.08698	0.924955	5483.37	0.873935	68.6667
220	112	1123	3196	105.649	2.61405	0.523827	2895.8	0.913221	72
585	297	5000	5000	109.77	2.53482	0.756455	4002.77	0.896627	73.5
220	112	1706	1459	121.665	3.03064	2.36309	10089.3	0.951678	78.3333
220	112	3465	567	46.4392	1.1357	1.55023	7374.6	0.959474	78.8333
220	112	1497	5000	143.125	3.36052	0.805987	4743.2	0.876412	69.5
561	285	959	179	47.3534	1.10637	1.24442	7184.47	1.11419	89.3333
220	112	4923	3023	58.7206	1.33101	0.655236	3552.1	0.859133	70.6667
230	62	1320	189	39.5903	0.948814	0.596037	2876.22	0.972433	80.3333
220	112	4190	1133	35.1024	0.946729	0.657971	2187.97	0.877196	74
561	285	5000	3144	56.3022	1.46829	0.591207	2644.07	0.929912	74.6667
220	112	5000	913	40.1662	0.935588	1.14734	6797.33	0.889349	71
220	112	5000	3256	55.1456	1.32415	0.718684	3890.28	0.851852	68.5
220	112	3681	5000	91.7417	2.25476	0.669122	3063.6	0.808658	66.3333
200	102	2581	1424	59.1887	1.60434	3.90089	10667.4	0.936364	76.6667
220	112	687	96	17.069	0.410282	0.504495	2709.47	0.895137	71.5
220	112	1304	266	53.0561	1.3655	0.964331	3729.99	1.02378	85.6667
220	112	5000	2948	63.1624	1.55529	1.58234	7805.15	0.873221	70.1667
561	285	5000	4007	63.4825	1.49445	0.579618	3040.82	0.916517	74.6667
561	285	210	65	35.0649	0.862376	1.13265	5552.95	1.18374	96
561	285	47	5	6.34171	0.13802	0.417502	2663.89	0.847461	68.3333
561	285	5000	3385	57.691	1.61203	1.07834	3970.3	0.928844	75.6667
220	112	4052	1163	52.6459	1.23657	0.820075	4405.51	0.912874	73.5
585	297	5000	2008	52.4468	1.14937	1.02774	6341.9	0.935249	75.8333
220	112	5000	1815	44.0391	1.11392	1.15247	5669.18	0.863481	68.8333
220	112	3936	2408	81.1158	1.84427	0.890453	4842.48	0.902767	73.6667
220	112	460	114	47.4475	1.14551	0.709091	3866.59	1.07103	85.3333
220	112	173	92	52.3049	1.3615	0.445097	1981.56	1.09306	87.8333
220	112	3496	869	37.8572	0.994585	0.701278	2746.5	0.905765	75
220	112	1804	490	42.2864	1.06224	0.648916	3128.74	0.958761	77.3333
220	112	5000	5000	72.2796	1.79714	1.27005	5806.12	0.834111	68.5
220	112	788	145	44.3342	1.10604	0.972965	4550.7	1.05465	85.5
561	285	17	276	42.5775	1.06673	0.132673	580.375	1.09089	90.1667
561	285	4425	883	26.0374	0.591918	0.497885	3113.91	0.878057	70
220	112	722	123	36.1295	0.900716	1.087	5741.12	1.05286	84.3333
220	112	327	65	24.7537	0.605559	1.09086	5513.08	1.06168	85.6667
561	285	5000	1344	77.0069	1.90301	1.52812	7583.41	0.997579	80.6667
561	285	5000	5000	53.964	1.48579	1.00626	3729.99	0.862609	70.8333
220	112	3967	585	42.4317	0.98275	1.24029	6914.66	0.935725	75.6667
561	285	5000	5000	41.9898	1.16905	2.04248	8047.86	0.864667	69
230	62	833	79	48.7408	1.25928	1.0927	4350.31	1.06474	88.6667
220	112	17	17	28.6036	0.739123	0.43777	2026.44	1.19213	96
220	112	5000	2436	69.0656	1.63924	1.01031	5185.56	0.891583	72.3333
220	112	5000	1719	42.2254	0.984904	1.27296	6577.51	0.844818	69
220	112	5000	3980	68.2847	1.59169	0.925656	5567.98	0.858117	68.3333
220	112	35	21	21.7137	0.570041	0.65474	2683.85	1.15605	95
220	112	2156	764	37.2203	0.983044	0.539506	2219.37	0.917047	74.6667
220	112	5000	2075	60.1473	1.55021	1.65138	7528.96	0.90629	73.1667
220	112	782	166	68.6059	1.50899	0.91543	6092.75	1.05885	84.1667
220	112	5000	748	29.1382	0.735117	0.976142	4362.08	0.852842	69.6667
561	285	5000	5000	63.5513	1.40666	1.09253	6739.42	0.848845	68.3333
220	112	678	124	34.4216	0.877342	1.78157	8373.2	1.06444	85.5
220	112	5000	1216	40.5742	1.05219	0.69006	2698.46	0.919621	76.1667
220	112	155	119	48.3727	1.11789	0.363645	2133.71	1.06792	86.6667
561	285	875	378	80.9111	1.8144	0.551873	3227.95	1.06913	86.8333
220	112	3908	119	57.587	1.55658	1.78087	7315.06	1.09804	87.8333
263	134	107	13	44.5991	1.18905	0.994601	3981.09	1.26743	103.667
561	285	444	80	13.0327	0.34505	0.686849	2740.91	0.983696	80.5
230	62	191	17	97.2141	2.41624	1.21378	5097.58	1.16227	97.5
220	112	5000	3332	66.8215	1.52585	1.86847	11324.9	0.863396	68.6667
220	112	3371	577	51.9662	1.09827	1.11857	8696.02	0.950596	74.1667
561	285	1602	282	31.7038	0.805587	0.991309	4730.4	1.04842	84
561	285	5000	3040	45.1172	1.2363	0.654844	2427.37	0.913351	75
561	285	53	31	30.0978	0.777492	0.745615	3525.69	1.2296	98.6667
220	112	5000	1703	50.6238	1.142	2.15441	13372.3	0.876946	70
561	285	3544	997	83.855	2.28395	1.58624	6248.35	1.01902	82.8333
585	297	3939	685	44.8574	1.04157	0.958911	4702.79	1.0058	83.5
220	112	5000	1657	33.0995	0.974154	1.27755	3866.59	0.845711	69.1667
561	285	5000	2000	55.7058	1.419	1.47653	5842.84	0.955697	79.6667
220	112	2682	456	46.2552	1.20661	1.6602	7040.34	0.983426	79.6667
220	112	1152	210	61.8202	1.55179	1.42167	6782.05	1.04988	84.8333
561	285	3766	967	67.0874	1.47778	0.83727	4709.15	1.00389	82.6667
585	158	2587	208	28.5731	0.791861	1.15253	2772.72	1.02393	91.1667
561	285	72	52	28.4918	0.721206	0.391244	1748.35	1.18541	96.8333
220	112	1019	221	44.3662	1.19671	0.808103	3382.71	1.02732	82.6667
230	62	197	18	75.4386	1.94828	1.38118	5720.48	1.17251	97
220	112	3444	1811	77.4251	1.92965	2.92342	13590	0.930055	76.1667
561	285	2640	1233	129.272	2.97329	2.28623	12433	1.01102	82.5
230	62	1408	144	59.6392	1.61442	1.31061	3978.39	1.0352	88.6667
220	112	5000	5000	63.9425	1.95471	1.96895	5715.32	0.850937	68.6667
220	112	124	60	31.7264	0.871704	0.871984	3334.84	1.04592	84.6667
585	158	361	56	19.3341	0.478174	0.714816	2833.59	1.05865	89.6667
220	112	5000	5000	57.0284	1.67321	1.83005	5834.95	0.820325	67.1667
585	297	3989	748	56.8537	1.20989	0.982271	6559.76	1.01221	81
220	112	5000	3146	46.1051	1.13928	1.38048	6924	0.823104	66.5
585	297	1224	695	38.2349	0.916874	0.393036	2004.56	0.992963	80
220	112	208	75	38.763	0.962962	0.546609	2615.52	1.08962	88
220	112	3451	298	20.0028	0.527368	0.757865	3116.03	0.846173	69.5
220	112	4154	1393	68.7794	1.5441	0.997035	6506.8	0.922205	73
220	112	1808	4669	83.8854	2.03109	0.479052	2313.18	0.881456	71.6667
220	112	538	94	72.7901	1.56282	1.49032	11032.3	1.10554	86.3333
561	285	601	223	52.4278	1.30002	0.541061	2384.91	1.09429	90.3333
220	112	943	486	71.9281	1.90423	0.619774	2799.18	1.00056	79.5
220	112	5000	2263	68.5069	1.61954	1.41498	4972.87	0.894627	72.5
220	112	5000	4435	43.5019	0.988331	0.818182	3139.37	0.769685	62.5
585	158	929	104	31.7603	0.962963	0.908889	1916.75	1.09632	96.1667
561	285	5000	1505	55.3051	1.24277	2.06174	8343.09	0.971191	78.1667
561	285	2553	436	43.1812	1.09949	1.08279	4912.77	1.04319	85
220	112	2390	1580	100.225	2.53509	1.21401	5508.12	0.940914	76.6667
561	285	5000	34	101.683	2.53407	1.07973	4966.16	1.21188	99.3333
561	285	3925	3063	77.9861	1.89461	0.590002	1903.79	0.949146	76.6667
220	112	958	629	107.963	2.62632	0.776971	4354.23	0.991868	78.6667
561	285	2260	531	33.4193	0.862856	0.637128	2733.48	0.999336	81.5
220	112	3648	1700	56.353	1.47746	0.736411	3343.9	0.907299	72.6667
220	112	363	80	49.6913	1.23889	2.15723	10337.7	1.12602	91.6667
585	158	5000	5000	63.4137	1.71757	1.11862	3697.22	0.805256	68
220	112	938	296	77.7893	2.01026	0.844863	3793.81	1.02961	83.3333
585	158	5000	4800	55.7963	1.46922	0.691574	2280.45	0.863082	74.1667
220	112	757	661	102.327	2.4636	0.598919	3193.09	0.990279	79.8333
585	158	685	279	41.899	1.04351	0.358165	1377.29	1.02785	87.5
561	285	663	207	39.4833	1.0289	0.600291	2397.9	1.08848	89.8333
220	112	5000	4208	61.9207	1.59341	1.2002	5924.98	0.852502	67.3333
220	112	213	113	108.627	2.9372	0.613058	2470.58	1.08052	87.5
220	112	529	1189	78.6647	2.26068	1.1824	3598.2	0.920252	76.6667
220	112	5000	285	68.7422	1.94556	0.465135	1698.64	1.03939	84
561	285	5000	5000	78.7215	1.87061	1.5912	9015.02	0.91056	72.6667
220	112	5000	259	36.8261	0.892588	1.87693	10455.1	1.02868	81
220	112	867	216	35.1649	0.945336	0.638765	2407.68	1.00749	82.5
585	158	5000	716	38.4287	1.01744	1.0589	4115.71	0.950854	78.8333
561	285	5000	1246	57.7118	1.43258	1.04885	5134.44	0.986051	79.3333
320	163	716	151	77.537	1.84742	0.964074	4377.82	1.09245	91.1667
700	189	154	17	87.2519	2.14594	0.782283	3778.39	1.22831	100.667
230	62	164	54	52.5795	1.23728	0.406092	1840.27	1.08576	91.3333
561	285	5000	5000	81.7036	2.05759	0.837429	4181.28	0.868757	69.6667
561	285	5000	2121	34.4216	0.919398	2.60221	11752.8	0.901973	71.6667
220	112	46	21	40.8092	1.06288	0.57553	2359.16	1.19256	98
220	112	836	761	82.5932	2.09803	0.525147	2419.15	0.980212	79.6667
220	112	1046	271	84.3103	2.27585	1.30632	5106.77	1.0382	84.5
220	112	1583	146	38.5328	0.973753	0.848974	3793.81	1.02831	84
220	112	332	267	42.6775	1.17724	0.70837	2729.77	0.95242	77
230	62	5000	73	43.9914	1.12778	0.402098	1510.98	1.08916	92.3333
220	112	5000	2856	79.0062	2.15951	0.986634	3520.9	0.901535	74.5
220	112	5000	3363	57.5039	1.44314	0.792458	3898.21	0.876026	69.8333
320	163	746	83	47.4218	1.25205	0.971274	3504.22	1.12377	94.3333
320	163	2455	580	56.6591	1.33999	0.848976	4805.55	0.994498	80
393	200	5000	568	79.55	1.7407	0.881401	6038.11	1.03236	81.6667
320	163	529	172	69.428	1.62534	0.623162	3809.29	1.08079	85.1667
220	112	2950	618	56.8639	1.48069	1.48543	6299.21	0.975197	79
220	112	2063	435	54.7094	1.57583	1.87303	5699.9	1.00628	83.8333
220	112	465	115	54.355	1.40321	0.742634	3090.75	1.07969	88.5
220	112	2492	1329	118.159	2.4687	1.48381	10635.5	0.950022	75.6667
220	112	1976	431	70.616	1.70157	1.50121	7882.86	1.00633	81.3333
320	163	4364	897	46.0718	1.18248	0.951771	4439.37	0.953258	76.6667
220	112	5000	927	35.0649	0.947869	1.16133	4937.17	0.890494	70.1667
230	62	4140	258	31.2332	0.79651	1.19315	4219.11	0.918595	78.6667
561	285	858	148	53.4599	1.55711	1.44879	4690.1	1.13667	92.8333
585	158	4624	3045	124.06	2.98852	1.01464	4807.71	0.929254	77
220	112	2223	748	42.3399	1.2187	0.647372	2015.47	0.943836	78.3333
561	285	5000	5000	102.161	2.17138	1.16018	8047.86	0.815334	64.8333
220	112	1625	237	33.3479	0.897402	1.15455	4692.21	0.998339	80
561	285	5000	3255	103.274	2.25671	1.58259	9430.28	0.950252	77.5
220	112	2019	5000	104.549	2.80956	0.74594	3022.3	0.880017	71.8333
561	285	1500	302	31.6361	0.827879	0.793395	3770.71	1.04213	82.8333
220	112	2092	497	78.3247	1.79596	1.71877	10497	1.00088	79.5
220	112	2929	517	40.9716	1.12983	2.05815	6911.55	0.972308	81.1667
320	163	175	29	93.6151	2.50591	1.9885	8260.84	1.19772	96.5
320	163	1506	257	50.169	1.24494	1.22142	5712.75	1.05054	85.1667
220	112	4019	804	49.3249	1.27641	1.94382	9286.98	0.948578	74.6667
561	285	88	105	20.3585	0.576078	0.315961	1016.15	1.08417	90.3333
220	112	675	1414	139.857	3.40379	0.664587	2885.99	0.954993	79.6667
561	285	1283	1916	72.3709	1.65265	0.35535	2085.04	0.976327	78.6667
220	112	744	137	48.8995	1.3049	1.03914	4284.21	1.06811	86.1667
220	112	316	94	71.9281	1.77123	0.66705	3245.53	1.09603	89
561	285	5000	5000	85.784	2.17101	0.771304	3635.02	0.89874	72.8333
220	112	2689	1182	92.6403	2.21397	2.1855	12664.2	0.957261	75.5
220	112	88	33	50.7152	1.26361	0.567794	2615.52	1.16134	95.1667
49	25	11	7	28.8183	0.705272	0.529175	2694.8	1.14679	92.5
220	112	5000	166	23.9559	0.554255	0.719974	4330.76	0.914627	72.8333
49	25	88	73	97.2317	2.14012	0.471105	2995.75	1.02702	82.3333
220	112	5000	339	113.354	2.85645	1.30788	6070.84	1.03484	84
220	112	5000	1207	26.7802	0.735651	0.611884	2355.96	0.812939	66.3333
220	112	5000	5000	90.4918	2.4077	0.99381	3882.37	0.679859	55.8333
220	112	1588	625	90.2635	2.09431	0.91545	5633.55	0.987439	78.3333
220	112	5000	692	67.5004	1.9442	1.50248	4600.15	0.993277	82.6667
220	112	558	110	96.6368	2.26702	1.4688	8040.62	1.09199	88.3333
220	112	5000	3026	71.5139	1.92598	1.41677	5227.77	0.890348	73.1667
561	285	5000	5000	86.8748	2.17409	1.2548	5824.45	0.76997	62.5
220	112	5000	394	41.0308	1.03688	0.942448	4211.52	0.983421	80.3333
220	112	5000	5000	63.1853	1.596	1.25211	5552.95	0.821197	67.1667
585	158	2883	575	72.9216	2.11771	0.830802	2528.25	1.01228	84.3333
561	285	2338	740	28.6648	0.781096	0.487191	1933.74	0.95872	77.8333
561	285	3363	2891	73.8755	1.95089	0.562474	2458.87	0.954481	77
220	112	2900	835	76.26	1.85806	1.64258	7672.72	0.968696	79.8333
220	112	2879	926	75.6022	1.8254	1.1595	6040.84	0.959122	77
220	112	2625	644	57.7535	1.26578	0.847393	5813.97	0.956754	75.6667
220	112	2577	745	54.5516	1.45225	0.857971	3321.29	0.958462	78.8333
220	112	3458	973	55.385	1.41977	0.935996	4604.3	0.938748	74.8333
220	112	866	129	28.4614	0.655324	0.940523	5787.85	1.00215	79.5
585	297	5000	5000	61.4531	1.5316	0.679293	3350.72	0.896037	72
220	112	3006	5000	85.939	2.05838	0.644047	3760.49	0.871724	68.6667
200	102	2084	411	62.8214	1.47839	1.43108	5753.55	0.996023	80.5
263	134	29	10	63.4595	1.52913	0.657636	3586.01	1.25721	100.167
220	112	5000	861	49.4498	1.05665	1.30129	9203.72	0.915015	72
200	102	1677	268	45.4852	1.02611	1.08797	4166.8	0.995017	82.3333
220	112	4592	4858	89.4525	2.30969	1.27837	5653.89	0.875009	71
230	62	1347	442	43.1889	1.22414	0.456538	1466.03	0.943906	78.6667
561	285	1369	614	47.7309	1.29574	0.498206	1764.44	1.0273	85
561	285	1495	597	39.9926	0.990575	0.482312	2343.2	1.00756	81.1667
561	285	5000	5000	73.3705	1.69853	0.57166	3038.75	0.779998	63.8333
220	112	158	984	97.4778	2.41379	0.265543	1309.83	0.983152	79
561	285	5000	3607	55.5853	1.33098	0.732334	3679.7	0.908898	74
561	285	2248	539	30.0656	0.822195	0.610967	2540.29	0.9917	79.1667
220	112	3322	383	27.8598	0.695649	0.928289	4859.96	0.906296	71.5
561	285	5000	3505	49.5212	1.18977	0.842448	3887.64	0.896097	74
220	112	5000	2659	38.1178	1.02236	1.18559	4554.8	0.815584	67.1667
220	112	1743	466	38.8822	1.15606	0.692846	2118.56	0.971198	78.5
220	112	5000	2117	51.175	1.33839	0.512125	2343.2	0.906365	72.5
561	285	5000	5000	102.161	2.31107	0.62731	3911.46	0.846269	67.5
446	49	2467	153	58.7206	1.60481	2.99785	7556.13	1.03426	92.1667
220	112	5000	472	43.2357	1.22166	0.690944	2168.75	0.998101	83.5
200	54	3519	301	44.8251	1.03553	1.1269	3792.91	0.936369	79.1667
220	112	983	827	116.004	3.10223	0.924362	3745.21	0.978024	79.8333
561	285	5000	1106	57.1933	1.41119	1.35004	6489.24	0.995493	81
220	112	2815	902	57.0284	1.31681	0.743224	4473.49	0.937822	73.5
320	163	4800	1692	82.8919	1.86827	1.22653	4600.15	0.946701	77.1667
320	163	5000	5000	103.947	2.35717	0.768616	4509.9	0.744656	60
561	285	5000	5000	58.5935	1.39494	0.907008	4245.79	0.85511	71
220	112	5000	2621	63.5513	1.55783	1.48366	8930.17	0.897417	70.3333
561	285	5000	3182	37.2876	0.943323	0.790351	3323.54	0.866462	71.5
220	112	1868	470	53.037	1.36598	0.833274	3010.02	0.984606	83.3333
561	285	1979	696	90.7535	2.24519	0.830847	3927.42	1.03562	84.5
561	285	5000	5000	96.2886	2.05237	0.879315	5989.37	0.894355	71.3333
220	112	5000	2118	51.5086	1.4572	1.7096	5613.29	0.907667	74.6667
561	285	641	2607	81.3798	1.71844	0.258453	1730.05	0.968219	78
320	163	5000	5000	67.6467	1.51891	1.05964	6607.2	0.823284	65.6667
561	285	5000	5000	57.4209	1.44308	1.99681	8950.3	0.765497	62.5
561	285	5000	5000	69.1279	1.47162	0.571547	3916.78	0.794858	63.3333
561	285	4587	5000	108.902	2.56673	0.524598	2969.44	0.841179	67.6667
585	158	1948	664	75.0718	1.99307	0.554887	1595.83	1.00477	88.3333
561	285	5000	5000	67.1843	1.46698	1.23378	7229.91	0.806996	66
585	297	5000	1598	55.5151	1.46612	0.999662	3989.21	0.973513	79.6667
320	163	208	63	30.9674	0.751673	0.75936	3504.22	1.1181	92.3333
220	112	1405	226	45.1498	1.12807	1.30858	4389.67	1.02691	81.6667
585	158	1013	201	101.61	2.63679	3.43591	14016	1.09318	90.6667
200	102	654	139	46.9279	1.09332	1.36128	5728.21
220	112	2723	919	61.731	1.54064	0.837997	4261.12	0.949387	75.8333
561	285	5000	4148	100.551	2.12328	1.26049	8437.55	0.933049	75.1667
220	112	1785	404	67.0027	1.42279	0.944684	5473.5	0.997711	82.3333
220	112	2696	822	59.8332	1.44052	0.829964	4358.15	0.95151	76.8333
220	112	5000	1995	49.3516	1.23042	1.60757	7990.09	0.872251	70
220	112	5000	5000	61.4642	1.60952	0.777676	3103.36	0.807822	66.1667
220	112	5000	5000	65.1777	1.73025	1.22927	5106.77	0.769517	62
561	285	1302	271	44.72	1.25687	0.863339	2793.49	1.08223	90
220	112	707	130	38.7211	0.903115	1.84956	10917.7	1.064	84.3333
220	112	575	107	63.1624	1.69211	1.87304	7417.9	1.10246	90.3333
561	285	5000	5000	71.3205	1.78401	0.519748	2222.39	0.882646	73.1667
561	285	2186	537	82.862	2.06582	1.04624	4675.34	1.05075	85.8333
220	112	5000	5000	103.386	2.26535	1.25325	7707.35	0.854623	68.8333
220	112	460	92	95.9762	2.41579	1.77227	7624.49	1.10494	90.8333
220	112	127	28	64.7555	1.62536	0.815527	4065.74	1.17398	94.1667
561	285	5000	4854	48.3989	1.28637	0.685352	2653.06	0.885514	72.8333
200	102	1402	325	65.4488	1.70701	2.20791	6807.77	1.02599	83.8333
220	112	3721	1001	60.5393	1.49957	1.09846	5585.56	0.941437	75.3333
561	285	347	156	27.7905	0.726788	0.485908	2092.12	1.07983	87.3333
220	112	412	164	44.6555	1.18664	0.512031	2027.82	1.04754	85.8333
220	112	271	59	19.7305	0.580813	1.30308	3853.49	1.07243	87.1667
220	112	2085	2105	66.4007	1.68198	0.530557	2731.62	0.910095	72
561	285	5000	5000	42.886	1.10154	0.785728	3016.15	0.787748	66
220	112	1779	415	55.9578	1.41365	0.909664	4158.74	0.995356	81
200	102	2177	287	33.0289	0.837846	1.65752	6114.5	0.970948	77
220	112	1048	192	57.1108	1.17488	1.9944	15504.9	1.05313	82.1667
561	285	1257	777	153.065	3.81365	1.18209	5751.47	1.02419	83.1667
220	112	5000	5000	79.6649	1.83271	1.30932	7875.77	0.814165	64.8333
561	285	714	794	60.1581	1.45838	0.344849	1894.77	1.02212	81.3333
220	112	2731	2075	95.2343	2.45587	1.12299	4389.67	0.925284	73.6667
220	112	2023	376	52.6745	1.3857	1.29383	4639.68	1.00363	84.3333
561	285	5000	5000	45.1172	1.19727	1.20062	5180.89	0.866001	69.3333
393	200	1010	497	63.6776	1.63435	0.528136	2052.74	1.02925	85.3333
230	62	416	95	71.025	1.97268	0.586806	1985.6	1.0615	88.5
220	112	5000	1569	58.6464	1.50361	1.28321	6530.29	0.911974	71.6667
220	112	1401	2085	165.003	3.59869	1.5511	10970.5	0.93196	73.3333
561	285	5000	5000	49.5033	1.3417	0.866211	3067.76	0.80975	67
220	112	487	96	92.1566	1.90347	1.06014	6483.4	1.09772	89.3333
230	62	128	18	38.2418	0.945062	1.00774	4685.88	1.16398	96
320	163	5000	5000	109.929	2.65223	1.2548	7107.24	0.821007	65
220	112	1911	924	89.8733	2.36589	1.07997	4747.47	0.968512	78.6667
320	163	5000	1617	37.3482	0.980837	1.0901	4587.73	0.881498	71.5
561	285	5000	5000	81.2917	2.13362	1.39107	5989.37	0.855977	69.1667
561	285	5000	1177	46.6745	1.13363	0.993434	4747.47	0.970354	79.6667
220	112	2430	685	73.9289	1.92105	1.47592	5800.9	0.981208	80.5
220	112	3445	884	63.1283	1.64952	1.56095	6276.55	0.958433	78.3333
220	112	1842	2517	100.045	2.1873	0.605804	4350.31	0.915212	71.8333
320	163	5000	4345	70.5396	1.77997	0.823337	4093.42	0.888053	70.6667
561	285	3719	475	29.0967	0.687735	1.05228	5871.86	0.977001	78.1667
220	112	5000	175	42.4087	0.871027	0.803824	6076.31	1.04926	82.8333
585	297	444	96	78.0565	1.77252	0.812337	4062.98	1.15556	96.3333
561	285	2194	1407	44.0312	1.10056	0.410519	2071.64	0.959827	76.8333
220	112	1949	276	33.5265	0.898587	1.18638	4966.16	0.985898	79.3333
561	285	5000	5000	93.632	1.99387	0.4905	3325.8	0.837299	66.8333
561	285	5000	1888	58.6464	1.38477	1.8345	8142.65	0.96097	80.5
561	285	1186	219	57.7639	1.3994	1.0664	5473.5	1.10318	89.5
561	285	4328	818	54.3747	1.36581	1.1332	5735.95	1.01239	81
220	112	5000	951	38.0559	0.823281	1.1601	7515.41	0.855827	68.8333
320	163	5000	4011	53.3057	1.16482	1.36897	8380.75	0.8395	67.6667
561	285	4238	673	38.4564	0.969442	1.03192	5074.68	0.997166	80.1667
561	285	5000	1392	48.6705	1.13974	0.748189	3610.43	0.95831	79.1667
561	285	5000	5000	71.2047	1.55974	1.67773	10384.3	0.892536	72.3333
320	163	5000	1778	44.2463	1.27949	1.17664	4035.5	0.912777	73.8333
561	285	5000	5000	40.0648	1.12767	0.964383	3158.61	0.846699	70.3333
220	112	5000	1528	55.978	1.53516	1.82509	6518.53	0.918044	75.1667
561	285	2425	731	42.0809	1.11331	0.601797	2475.62	1.00302	81.6667
230	62	797	71	31.8282	0.878807	1.10646	2714.99	1.04797	93
220	112	5000	2542	53.9251	1.3905	0.945703	3760.49	0.871739	72
561	285	5000	1914	65.2954	1.60699	1.39917	6553.85	0.966741	79
320	163	5000	3000	81.4386	2.13083	1.64847	7011.87	0.920113	74.5
274	139	1539	1867	112.701	3.06912	0.875393	3345.04	0.948589	77.5
220	112	3116	4034	123.323	2.79446	1.54242	9989.84	0.893701	70.8333
320	163	507	158	151.062	3.40725	2.31986	14385	1.08756	86.1667
220	112	270	58	25.1535	0.586747	1.22598	6530.29	1.07267	87.1667
320	163	760	1159	110.526	2.55539	0.47639	2401.15	0.984177	81.3333
320	163	1077	611	29.4721	0.780021	0.364906	1643.08	0.932964	74.1667
230	62	5000	519	37.7276	1.02809	1.24965	4219.11	0.903189	76
220	112	5000	2264	64.9428	1.53272	0.962956	5710.18	0.890149	70.5
230	62	2467	293	38.512	1.02085	0.732264	2389.77	0.946988	80.8333
585	158	5000	1768	88.9052	2.33159	0.968695	2785.92	0.951691	83.6667
561	285	3100	500	35.0524	0.962911	1.05702	3662.26	1.02075	84
561	285	5000	3284	84.6763	2.08287	0.862458	4625.08	0.946465	75
220	112	2311	1033	72.0841	1.97406	0.909965	3642.43	0.956396	76.8333
220	112	2167	2758	56.4345	1.49567	0.457797	1830.93	0.885936	71.8333
220	112	1282	319	27.116	0.734103	0.5334	2199.13	0.937953	75.6667
220	112	4307	5000	109.493	2.45852	1.15951	7229.91	0.858806	68.5
320	163	1018	393	110.846	3.21508	1.57516	5143.7	1.03604	83.6667
561	285	3127	652	65.9112	1.51925	2.20336	8004.49	1.04583	85
561	285	5000	5000	49.916	1.20897	0.838269	4173.75	0.864595	70.5
561	285	5000	5000	102.605	2.48747	0.789656	3991.92	0.827853	67.3333
220	112	1896	319	42.4624	0.977688	0.934678	3653.57	0.981806	78.1667
220	112	1768	2033	82.4443	2.17821	0.625085	2656.66	0.926104	74.3333
561	285	4700	3775	57.6285	1.39895	0.480825	2578.5	0.91702	72.6667
220	112	1318	1481	120.311	3.01827	0.906034	4104.55	0.948856	77.3333
220	112	1082	152	25.2432	0.698518	1.52339	5957.09	1.00959	80.6667
220	112	5000	1391	67.7445	1.36655	1.84557	9498.47	0.913783	72.3333
200	102	2851	464	41.3431	1.02046	1.0595	3625.03	0.950776	77.6667
220	112	735	136	70.2854	1.79303	1.63457	7645.12	1.08344	87.8333
561	285	5000	5000	66.4846	1.57099	1.29487	7975.71	0.853448	67.1667
220	112	2453	581	56.8024	1.5245	1.0809	4322.97	0.978435	79.3333
230	62	3799	1325	51.49	1.27691	0.55987	2219.37	0.871718	73.8333
561	285	1037	302	154.341	3.22643	2.16639	13077.8	1.08386	88.8333
561	285	1631	473	48.2507	1.23166	0.635974	2594.3	1.04093	86.3333
320	163	3482	5000	53.8862	1.39598	0.332894	1428.22	0.752057	61.3333
320	163	4287	1799	88.7769	2.15067	2.02814	11279.9	0.952835	75.6667
220	112	3644	742	48.5302	1.27596	1.14636	4489.63	0.948034	78.5
561	285	5000	4777	96.6368	2.18625	2.01352	12785.9	0.92849	73.8333
220	112	272	85	33.8866	0.840221	0.584053	2929.4	1.06859	86.3333
561	285	2938	614	47.1487	1.20103	0.844292	4196.37	1.02178	82
220	112	1967	932	34.336	0.89602	0.443427	1894.77	0.889913	72
220	112	149	57	23.9986	0.727459	0.55178	1528.51	1.08718	89.3333
220	112	1318	517	111.972	2.41545	1.06169	7658.91	1.00091	78.5
561	285	2094	515	87.0945	2.32324	1.24051	5547.95	1.05445	84.6667
220	112	680	146	56.069	1.63026	2.32646	8033.38	1.08787	86.1667
320	163	2817	507	32.8881	0.807926	0.720195	2341.61	0.946217	76.3333
220	112	2996	1995	82.3253	1.89471	0.78346	4196.37	0.916782	75
220	112	4397	1087	42.3094	1.10667	0.819758	3334.84	0.903416	74.3333
561	285	5000	5000	51.2675	1.26902	1.16755	5856.02	0.831356	67.1667
220	112	429	82	20.3078	0.533007	0.700518	3016.15	1.00242	81
671	341	28	27	31.4452	0.688569	0.642327	4115.71	1.2501	100
585	158	666	88	40.9273	1.06312	0.753845	2682.03	1.11175	94.3333
214	109	136	41	24.9128	0.66702	0.801741	3063.6	1.10975	90.6667
200	102	356	67	72.4493	1.80702	1.06107	3672.22	1.11455	89.3333
220	112	329	78	35.2025	1.00054	0.774091	2465.56	1.09257	90.3333
561	285	2097	268	22.8398	0.541541	0.994168	4583.61	0.983092	81.8333
230	62	3498	417	28.1189	0.960328	0.716626	1325.48	0.910686	75.8333
220	112	5000	1387	49.165	1.01629	1.47861	11348.3	0.869901	68.5
230	62	2639	1932	72.4493	1.70257	0.518902	2627.08	0.881449	73.3333
585	158	1410	198	112.052	2.65304	1.11617	4687.99	1.0721	91.3333
220	112	2572	505	48.0248	1.05292	0.855505	4280.35	0.954731	80.1667
561	285	337	72	53.5371	1.33012	1.00378	4485.59	1.17929	96.3333
220	112	1513	194	21.9469	0.639835	0.875106	2698.46	0.955439	78.6667
220	112	561	110	59.7038	1.60451	1.00475	4469.46	1.088	86.6667
561	285	5000	1543	36.7929	0.98682	1.14467	4397.58	0.932964	76.8333
220	112	340	88	76.3978	1.78656	0.744817	3907.48	1.10064	89.6667
220	112	3361	1300	65.8398	1.83137	1.07791	4060.22	0.93854	76.1667
561	285	5000	5000	56.0285	1.26777	0.930592	5741.12	0.848942	67.8333
561	285	3780	5000	136.613	3.40998	0.971736	4469.46	0.90484	74.1667
156	80	376	95	64.9897	1.62861	0.780643	3036.69	1.07441	86.3333
212	108	169	57	61.0551	1.35438	0.579184	3814.46	1.12182	88.6667
585	158	5000	3053	79.4352	1.80981	0.691132	3662.26	0.910377	75.1667
320	163	123	98	28.4817	0.742768	0.357307	1597.99	1.07521	86.3333
220	112	875	236	91.1147	2.38707	1.20255	4781.81	1.04528	86.3333
220	112	1241	230	72.3709	1.58269	1.46307	9055.71	1.04472	84.6667
320	163	588	127	38.5189	0.899685	0.830105	4530.25	1.07647	85.3333
220	112	2166	708	39.3908	0.982222	0.5618	2647.66	0.92219	74.6667
561	285	590	210	42.1112	1.05238	0.547492	2468.91	1.08832	89.5
587	298	380	455	45.8893	1.11911	0.319715	1398.96	0	0
220	112	2746	1395	49.862	1.25851	0.570182	2812.51	0.906408	72.8333
220	112	369	82	55.5853	1.23814	0.812299	4679.55	1.09918	89.5
220	112	327	75	31.7377	0.723811	0.790854	4903.93	1.06652	84.5
220	112	1812	953	68.705	1.60876	0.622362	3549.69	0.952194	76.5
220	112	4331	5000	68.6554	1.91281	3.90576	14263.6	0.864097	69.8333
561	285	3467	554	20.4748	0.549441	0.558032	2063.92	0.902943	74.8333
220	112	1130	187	49.5928	1.20743	1.42371	8113.37	1.04746	82.1667
220	112	139	229	66.9906	1.57072	0.295043	1670.07	1.04629	84.1667
561	285	1031	209	36.2326	0.944145	0.93156	4010.93	1.08699	87.8333
220	112	242	195	54.0225	1.39348	0.376925	1744.79	1.04726	84.3333
220	112	4197	1866	73.1854	1.75956	1.02531	5183.23	0.913917	74.3333
220	112	4437	915	50.2052	1.29943	1.31886	5572.99	0.935655	76.5
561	285	5000	917	31.0447	0.900026	1.48718	5190.23	0.967541	76.5
561	285	5000	5000	63.368	1.60371	1.1966	6465.91	0.842369	66.6667
561	285	5000	2041	33.7181	0.822002	0.820105	3727.46	0.875712	72.5
561	285	5000	5000	40.9716	1.15429	0.413865	1458.09	0.790035	64.8333
561	285	4112	4153	132.246	3.2266	2.2212	10328.4	0.945732	78
220	112	1082	155	26.666	0.749903	1.17198	4135.31	1.01166	83
220	112	1247	648	85.4749	2.02838	0.699371	3793.81	0.985413	79.8333
263	134	34	17	33.0524	0.828274	1.31044	6158.96	1.24496	100
220	112	3087	1916	61.3202	1.59714	0.669022	2969.44	0.908004	73
220	112	4562	2139	61.8091	1.55529	0.851298	4284.21	0.89615	71.1667
561	285	3023	1068	32.3884	0.748402	0.442535	2629.76	0.92113	73.5
220	112	174	38	99.5401	2.23192	0.838708	5746.29	1.14834	90.1667
561	285	2726	584	69.428	1.65241	1.0304	4608.44	1.04187	87.1667
561	285	4900	2373	30.3777	0.720505	0.382392	1656.52	0.846117	71.1667
561	285	5000	831	29.831	0.734047	0.730419	4162.49	0.934078	73.6667
561	285	5000	1271	40.2387	1.04947	0.978993	4019.1	0.955822	78.6667
561	285	5000	5000	66.8939	1.69242	0.831778	3768.15	0.901822	73.5
220	112	3799	1146	67.5248	1.75679	1.62756	7735.17	0.945672	75.1667
220	112	1180	268	51.1381	1.38956	0.859073	3412.69	1.02356	82.3333
220	112	834	224	105.383	2.5884	1.75084	8649.15	1.05148	85.1667
220	112	120	233	35.0649	0.754878	0.231434	1261.84	0.985655	82.1667
220	112	327	46	13.3097	0.348746	1.89716	8680.37	0.975124	78
561	285	4679	1044	55.2651	1.3498	0.914117	4481.55	0.993425	81
561	285	3007	1028	65.8636	1.53103	0.680031	3506.6	1.00209	82.5
561	285	5000	1634	34.5198	0.934185	1.89601	7474.9	0.927075	74.6667
561	285	519	131	54.7884	1.48361	0.718417	2671.13	1.13313	93
561	285	153	88	36.8593	0.994729	0.452705	1880.67	1.14807	92.5
200	54	2008	211	65.5552	1.40897	1.17305	4369.41	0.992609	84.3333
561	285	1747	322	56.8229	1.41925	1.07787	5157.61	1.07737	87.1667
585	297	5000	3399	77.677	2.02345	0.79942	3130.86	0.946021	78.3333
220	112	699	130	63.3451	1.59686	1.13421	5468.57	1.07861	87
561	285	5000	4661	38.7001	1.10762	0.621879	1950.87	0.868625	72
220	112	5000	5000	66.9181	1.72883	2.13738	9515.6	0.848315	68.1667
585	158	5000	839	48.6003	1.36149	0.816842	2523.11	0.968702	82
220	112	112	28	50.8803	1.20901	0.849966	5115.98	1.176	92.1667
561	285	1823	530	51.3601	1.32385	0.655423	2898.75	1.03728	84.1667
220	112	317	80	120.834	2.76042	0.993986	5356.45	1.10125	90
220	112	5000	587	31.1443	0.701054	1.01207	6465.91	0.864392	68.6667
220	112	976	790	48.7056	1.42337	0.435288	1394.22	0.959471	78.5
561	285	1638	283	60.6597	1.50824	1.43213	7282.19	1.09238	87.3333
220	112	3692	829	49.6644	1.27544	1.01541	4645.95	0.939702	75.1667
585	158	1371	138	49.4498	1.27829	0.995201	4090.65	1.09054	90.3333
220	112	275	221	43.2201	1.06973	0.353706	1854.06	1.0225	81.3333
220	112	4955	1283	51.1473	1.25595	0.965777	5194.91	0.906963	71.8333
220	112	3657	1549	55.5452	1.33774	0.696739	3669.72	0.903683	73
220	112	1156	161	27.5442	0.628442	0.839387	5284.57	0.970109	76.6667
561	285	86	46	35.5173	0.847114	0.587012	3201.77	1.19392	96.8333
561	285	3469	557	26.2796	0.640852	0.669699	3542.47	0.942823	75.5
561	285	1616	282	40.5815	1.11086	1.1678	4299.67	1.0782	87.8333
561	285	5000	829	26.6565	0.651053	1.24639	5132.13	0.908939	76.5
212	108	138	30	14.9235	0.36964	0.89464	4346.4	1.02411	82.5
320	163	766	1117	54.8775	1.57226	0.351132	1068.55	0.972266	81
561	285	2410	418	26.9716	0.760344	2.0475	6625.08	1.0272	85.5
587	298	2307	471	59.2315	1.64587	1.86992	7367.96	0	0
220	112	3485	259	23.3081	0.494615	0.776239	5040.51	0.835707	67.6667
220	112	5	5	1.2147	0.0310062	0.85893	3667.24	1.14606	94.3333
561	285	1037	188	19.7515	0.531546	0.792063	3182.28	1.01415	82.1667
410	111	5000	3110	58.763	1.32194	1.80963	8637.47	0.848796	71.8333
230	62	2975	506	34.7418	0.91059	0.550456	1806.86	0.889559	76.5
230	62	425	109	51.4343	1.2583	0.46839	1799.51	1.03912	89.1667
220	112	357	83	53.0466	1.20685	2.28223	15268.9	1.12485	88
230	62	113	20	19.6883	0.526225	1.37662	4358.15	1.11316	95.5
561	285	1730	595	34.4339	0.874938	0.498813	2424.08	0.993184	79.3333
220	112	4512	1291	58.6994	1.46382	1.09152	4997.56	0.922439	75.6667
263	134	7	10	25.1624	0.678536	0.502193	2196.89	1.25606	100.333
230	62	4004	393	48.9259	1.26714	1.55115	5603.19	0.953098	80.6667
230	62	617	57	54.257	1.43402	1.32043	4035.5	1.09544	95.3333
220	112	5000	1242	33.2176	0.862782	1.07336	4433.38	0.844785	69.3333
220	112	2633	434	44.8817	1.17628	1.4486	5613.29	0.982521	81.5
220	112	2539	697	57.4312	1.41857	0.866495	4583.61	0.961098	76.3333
220	112	908	167	19.5904	0.540053	0.535005	2109.23	0.927075	74.6667
263	134	16	14	33.4669	0.814859	2.0186	9971.86	1.28812	104.333
320	163	3661	508	27.4658	0.756723	2.22393	8376.98	0.952916	77.3333
320	163	484	113	115.523	2.5611	0.998211	6347.62	1.10494	88.5
200	102	3457	617	54.2276	1.16033	1.20598	5909.45	0.945088	76.1667
220	112	3289	333	27.4072	0.670843	1.10251	5125.2	0.912557	74.6667
220	112	5000	1333	49.3249	1.20378	1.26714	6120.24	0.898865	73.6667
561	285	5000	845	36.9192	0.80644	1.59052	10505.8	0.959091	76.3333
561	285	1799	552	29.0553	0.746328	0.493705	2183.52	0.975655	79.1667
561	285	5000	1636	32.5271	0.791468	1.69423	8894.05	0.891742	71.5
561	285	641	753	39.8269	1.11859	0.309461	1113.71	1.00889	82.5
220	112	2082	126	17.3529	0.425858	0.92483	4499.75	0.868205	70.5
561	285	149	148	13.2316	0.358523	0.228177	906.437	0.92825	74.6667
220	112	812	272	56.1297	1.49939	0.64404	2843.22	1.02602	81.8333
220	112	4115	1674	50.6512	1.48712	0.829944	2669.32	0.907846	73.5
220	112	439	228	51.6017	1.10621	0.436872	2917.5	1.02054	81.6667
220	112	694	362	127.603	2.894	0.879496	4930.5	1.02026	82.8333
320	163	5000	3295	67.5491	1.71458	1.69606	7932.72	0.900464	73
585	297	5000	5000	58.9435	1.43409	1.00006	4881.89	0.884162	72.3333
561	285	3887	664	34.903	0.815568	0.784811	4309.36	0.972981	78.6667
200	54	542	57	62.6176	1.48581	2.09588	7454.92	1.09861	91.3333
220	112	189	47	31.7829	0.817629	1.02479	4579.48	1.12624	92
561	285	5000	2453	38.9032	1.1377	0.777809	2318.59	0.916749	75.1667
585	158	1558	803	43.5726	1.23336	0.360037	1182.81	0.971588	80.6667
587	298	1506	369	105.269	2.4734	0.91096	5044.78	0	0
274	139	5000	1343	47.5933	1.14396	0.827956	4059.14	0.908352	73.6667
219	112	5000	1200	29.7886	0.807025	0.70756	2622.78	0.836223	68.6667
557	283	1034	194	45.5427	1.07611	1.11853	6235.85	1.10358	89
557	283	1472	890	142.25	3.67997	1.23253	5902.42	1.01825	80.8333
561	285	4447	311	19.4307	0.451582	1.22322	6923.94	0.906664	73
332	90	5000	2070	57.2656	1.30928	0.932144	4977.04	0.863023	71.1667
581	295	5000	1528	33.4907	0.895296	1.11927	3761.79	0.92106	76.5
557	283	2907	521	35.2652	0.950783	0.873093	3379.82	1.01317	83.3333
326	166	2986	442	38.2142	0.973817	1.61689	6434.77	0.995828	81.8333
212	108	2123	534	70.5141	1.81972	1.38325	6329	0.991792	79.3333
318	162	3251	1435	47.3534	1.13504	0.541188	2929.49	0.918176	73.8333
407	207	5000	2287	41.6878	0.936087	1.52631	6651.63	0.864376	70
212	108	155	40	19.4307	0.469983	1.27402	5749.97	1.07144	87.6667
212	108	132	25	11.5307	0.299335	1.70769	6768.69	0.997662	81.3333
200	102	1887	622	73.8888	1.5359	0.785515	3875.81	0.968275	78.5
219	112	2522	300	32.7012	0.745368	1.13528	6334.53	0.947169	76
212	108	1246	233	38.1798	0.941523	0.811924	4288.41	0.998618	79.3333
390	199	3559	855	61.642	1.67153	2.16946	8164.89	1.0052	82.3333
219	112	828	318	106.3	2.76995	2.57606	11091.5	1.03748	83.8333
320	163	4545	252	17.5531	0.434976	0.832993	3251.38	0.827005	69.6667
561	285	5000	2184	27.741	0.721003	1.30872	5323.96	0.83252	68.5
220	112	85	32	36.7597	0.946656	0.640091	2874.29	1.15728	93.6667
320	163	2608	5000	139.554	2.9781	0.855667	5003.15	0.90416	74.5
212	108	230	52	61.3091	1.51298	0.814077	3991.09	1.13236	91.8333
320	163	5000	1372	30.8574	0.767203	1.64348	8333.98	0.84265	66.8333
220	112	2878	492	46.5903	1.20561	1.66101	6808.66	0.977575	80.3333
561	285	5000	1238	52.0319	1.07912	1.87702	15078.1	0.970374	75.8333
220	112	837	155	43.7065	0.966509	0.888772	5782.66	1.03748	82.1667
320	163	5000	4597	74.8284	1.85335	2.13804	6692.37	0.886868	72
220	112	5000	3474	39.7909	1.04457	1.39147	5811.74	0.796243	64.6667
320	163	704	191	36.4007	0.975765	0.629235	2582.44	1.04872	84.6667
585	297	5000	5000	64.0811	1.60234	0.849288	4157.54	0.896975	72.1667
220	112	5000	635	21.3002	0.547574	0.957704	4300.51	0.75229	60.8333
220	112	4569	2070	69.2528	1.80518	1.13308	4732.54	0.909112	73.8333
200	102	2371	416	52.703	1.13188	1.07714	5165.25	0.971383	78
610	164	1311	755	39.2772	0.990389	0.312246	1329.06	0.957459	79.5
561	285	213	72	36.8793	0.870052	0.758552	4213.55	1.1636	93.1667
561	285	5000	5000	37.0327	0.912753	1.45122	7782.43	0.769792	61
220	112	5000	2495	60.2125	1.45641	0.847296	4415.48	0.879427	71.1667
220	112	1160	672	56.4752	1.22464	0.463776	2784.61	0.955549	77.8333
220	112	5000	1379	53.2672	1.18986	1.45705	8330.34	0.895403	73
561	285	344	1357	21.6211	0.700507	0.179538	403.399	0.915841	74.6667
561	285	5000	5000	49.2893	1.33107	3.58731	14130.8	0.898047	73
220	112	5000	854	28.139	0.685666	2.34274	11750.4	0.823104	66.5
561	285	2216	386	33.4669	0.83289	0.882571	4591.25	1.0233	81.5
230	62	2699	516	57.3588	1.51028	0.771347	2582.44	0.946937	81.1667
220	112	5000	1373	27.4561	0.61216	1.18689	7513.94	0.691301	55
287	78	383	203	26.685	0.721454	0.283655	854.523	0.954213	81.8333
220	112	2583	476	52.2389	1.32364	1.7259	7950.53	0.988415	80.3333
220	112	5000	1084	34.4953	0.846714	1.01175	3239.95	0.85315	69
561	285	4433	943	48.2507	1.23122	0.874423	4047.72	0.993446	80
275	74	175	22	39.3126	1.09863	1.03005	2966.87	1.16766	100
585	158	5000	3951	43.2514	1.12719	0.704304	2524.88	0.837822	71
320	163	4800	5000	104.587	2.41496	0.897663	4490.25	0.878193	72.6667
220	112	1270	333	20.999	0.589694	0.43315	1451.39	0.884161	73.1667
561	285	1069	770	20.7833	0.522992	0.265186	1253.58	0.873229	70.6667
561	285	5000	4730	35.7711	0.870962	0.473335	2338.27	0.827195	67
561	285	181	98	23.118	0.63771	0.489739	1669.8	1.10488	92
561	285	1289	3543	79.953	2.21202	0.365818	1442.22	0.956046	77
561	285	1306	201	18.335	0.528557	0.978813	3047.35	1.01011	83.8333
320	163	1314	1608	21.2472	0.561413	0.237732	985.418	0.768591	62.5
561	285	5000	808	37.4089	0.956999	1.26245	5933.39	0.983515	79
320	163	4639	2262	61.1213	1.66961	0.790025	3114.63	0.922936	74.3333
561	285	5000	576	18.5518	0.487541	1.26688	5153.75	0.848725	69.8333
561	285	5000	3366	59.7793	1.63726	1.01612	3738.02	0.930439	76.5
561	285	5000	5000	63.3337	1.56572	1.38586	6580.94	0.846296	69
561	285	2017	467	33.8384	0.904521	2.626	11452.9	1.04897	83.8333
561	285	2593	809	46.9534	1.17103	0.605481	3032.37	1.0002	80.1667
220	112	237	42	56.8537	1.56239	1.24107	4604.28	1.15536	94
561	285	972	205	29.5983	0.845469	1.71924	5775.1	1.09823	90
220	112	202	54	23.0522	0.614125	1.56294	6832.45	1.10008	88.6667
320	163	1239	148	17.4139	0.515017	1.36117	3703.94	0.983004	81.8333
561	285	5000	5000	79.1632	1.89314	1.05385	5610.01	0.909421	73.3333
561	285	1972	553	45.2804	1.10204	0.625993	3116.83	1.02198	83.3333
320	163	5000	541	22.7748	0.60048	1.42307	5943.75	0.870121	70.6667
320	163	5000	5000	41.7631	1.06333	1.2022	5317	0.801064	65
585	158	5	5	1.05723	0.0279269	1.04836	3719.63	1.10481	93
561	285	47	40	21.0664	0.587539	0.551683	1970.41	1.18063	96.6667
220	112	1138	178	35.5173	0.946953	1.49432	5455.59	1.03454	85.1667
220	112	491	77	18.4595	0.528743	1.10355	3688.32	1.01759	82.6667
214	109	327	48	13.7667	0.399464	0.859188	2981.53	0.984047	78.6667
220	112	5	8	10.7988	0.266185	1.4982	6911.88	1.19622	98
230	62	3718	454	55.1058	1.26522	0.959283	4783.38	0.939166	78.3333
561	285	556	605	30.2266	0.794576	0.287263	1011.51	0.986742	83.1667
557	283	2871	205	17.0179	0.381307	0.725981	4246.33	0.878291	71.3333
561	285	3861	758	40.7724	0.883155	0.727627	4992.26	0.973613	77
45	23	65	10	13.1301	0.36526	1.58801	4946.74	0.986889	82.6667
220	112	3406	472	30.5404	0.874678	1.06282	3815.16	0.934273	75
561	285	5000	1874	28.5223	0.820107	1.36399	4478.52	0.883355	72.6667
230	62	320	37	30.7258	0.792644	1.43837	5521.41	1.10404	92.5
220	112	5000	5000	79.6937	2.22444	1.25419	4944.58	0.850508	68.5
214	109	202	40	48.8289	1.26628	1.32458	6440.38	1.15975	91.8333
561	285	786	178	25.9264	0.727356	1.6493	5977.55	1.09575	88.6667
220	112	164	56	24.692	0.707579	2.14218	8097.51	1.12873	89.8333
220	112	1118	318	43.7934	1.13736	0.636818	2732.15	0.997293	81.3333
220	112	1099	108	19.9069	0.486136	1.07852	5739.94	0.949469	75.3333
220	112	5000	1747	60.945	1.47193	1.70267	8633.65	0.90413	73.5
230	62	5000	593	33.5504	0.928096	1.11374	3711.78	0.873372	73
561	285	5000	5000	57.8369	1.59676	1.50127	6101.34	0.81739	65.5
220	112	396	73	63.8502	1.41576	1.08651	6306.96	1.11492	90.6667
220	112	3581	1278	50.6329	1.2601	0.712214	3163.28	0.909692	75
220	112	151	38	53.4695	1.19742	2.02285	13002.3	1.18029	93.6667
220	112	5000	820	26.1675	0.6408	0.930811	4282.37	0.7968	65.8333
220	112	1721	292	35.5679	0.993391	0.947391	3461.75	0.991011	80.8333
320	163	242	122	49.0143	1.06249	0.449122	3058.11	1.08814	86.1667
410	111	2342	350	30.8134	0.780399	0.515872	2222.64	0.9413	78
585	297	382	104	30.8134	0.825178	1.43799	5399.96	1.15321	95.3333
220	112	3036	566	52.7887	1.32365	1.51014	8297.71	0.973539	76.8333
320	163	1044	216	29.2942	0.789441	2.28547	8447.42	1.04719	84.8333
561	285	5000	1004	30.4535	0.741543	0.874682	4704.76	0.918321	73.3333
320	163	1451	207	24.3602	0.674671	1.0009	3657.27	0.999184	81.5
557	283	340	92	17.9028	0.452689	0.830704	3601.03	1.05965	87
220	112	218	37	13.437	0.332514	1.87259	9097.54	0.991009	79.8333
220	112	1149	285	47.7999	1.22125	0.732108	3246.8	1.0107	82.6667
699	355	17	15	39.8197	0.900126	0.634474	3751.2	1.30894	105.333
561	285	207	47	61.8091	1.34506	0.98128	6887.81	1.2079	95.1667
220	112	4962	608	28.5833	0.750518	0.949609	4279.36	0.879132	70.5
561	285	5000	2715	39.6475	1.14464	1.25467	3988.28	0.909429	74.5
220	112	68	21	51.5179	1.13255	0.801708	5670.27	1.19884	94.3333
228	62	3059	346	46.2301	1.4006	1.17324	2981.53	0.967905	81.5
561	285	5000	1205	43.4156	1.19335	0.893541	3520.77	0.973273	77.6667
561	285	5000	5000	106.031	2.31955	1.18885	7030.45	0.912312	74.5
276	140	4581	1173	49.0409	1.31776	0.931813	3960.29	0.93441	75
390	199	4796	984	32.5155	0.792556	0.635512	2726.38	0.903213	75.5
220	112	427	88	19.6393	0.491179	0.557543	2514.23	0.970773	79.8333
220	112	537	130	43.6356	0.973115	0.690191	3657.27	1.04966	86.6667
200	102	1342	328	63.3909	1.63987	2.4616	7325.47	1.02724	85.1667
220	112	309	63	47.4989	1.14544	1.71841	9586.33	1.1339	90
220	112	2807	409	30.3993	0.810063	0.880148	3459.31	0.932452	76.5
561	285	5000	3813	43.92	1.14146	2.17372	9840.5	0.88812	71.1667
220	112	38	18	44.9628	1.08783	0.562325	3132.23	1.20289	95.5
230	62	486	95	52.722	1.42659	0.566197	1911.62	1.05372	88.6667
585	158	3555	272	30.8354	0.835479	1.47814	4625.41	1.01308	86.3333
561	285	4517	308	17.2166	0.439468	1.55002	6960.28	0.903998	73.1667
220	112	1542	999	55.9578	1.61825	0.554893	1808.14	0.951035	78.3333
220	112	675	339	139.001	3.53011	1.59259	7116.83	1.02219	83.5
220	112	634	140	53.3442	1.32947	0.822684	4445.44	1.06523	84.8333
220	112	5000	927	47.3705	1.12337	1.4489	7601.29	0.918563	74.8333
220	112	1524	306	41.5225	1.0573	0.81617	3505.92	0.993181	81.6667
320	163	5000	1526	52.551	1.52109	1.30923	4225.44	0.94029	76.8333
220	112	278	64	58.9435	1.53171	0.790641	3290.55	1.12035	91.8333
230	62	4193	157	18.4924	0.500144	0.808661	1715.1	0.827061	69.6667
561	285	174	32	8.85	0.249374	0.94807	3114.63	0.987647	82
230	62	444	268	154	4.27045	1.02249	3255.79	0.999347	84.1667
561	285	3101	557	40.6	1.01094	0.905967	4544.01	1.0152	82.1667
561	285	5000	3862	54.7094	1.30176	0.696429	3488.67	0.902299	73.5
220	112	3689	1459	40.9716	0.881811	0.511944	3217.21	0.847379	68.5
561	285	5000	5000	55.6054	1.37048	1.39126	6872.8	0.837484	67.8333
334	90	5000	3186	48.1984	1.37463	1.00772	3767.09	0.8389	68.1667
220	112	5000	1810	42.5468	1.03735	1.24424	6100.01	0.85081	69
561	285	5000	5000	35.5806	0.822372	1.05576	5802.87	0.77342	63
561	285	5000	4044	73.8222	1.79496	1.27543	6496.81	0.925334	75.1667
561	285	5000	5000	50.4414	1.21443	1.25123	6669.06	0.779388	62.3333
561	285	903	185	35.2652	0.908054	0.983299	4030.65	1.09521	90
220	112	1224	685	45.0521	1.07245	0.440619	2313.7	0.940344	76
220	112	5000	2362	32.6082	0.79954	1.08355	5863.93	0.758324	60
220	112	122	38	24.8243	0.612983	0.900811	4219.49	1.11359	91
230	62	116	39	20.4967	0.535685	0.35679	1259.78	1.02011	86.6667
276	140	29	111	24.196	0.638502	0.19037	795.118	1.0425	84.6667
320	163	1316	259	44.6152	1.24151	0.918891	3435.03	1.04606	85
320	163	3152	566	52.7315	1.27223	1.20604	6284.99	0.994762	80.5
220	112	1403	208	29.8948	0.638042	2.31449	10611.7	0.975315	77.5
561	285	5000	3461	44.5669	1.12789	0.469246	2279.72	0.897908	72.3333
214	109	5000	442	22.2617	0.589135	1.10346	4549.39	0.834654	67.3333
561	285	377	85	73.027	1.90776	0.770231	2971.05	1.15845	96.1667
585	158	700	289	29.6405	0.742846	0.321294	1117.6	0.985785	85.3333
320	163	1036	388	45.6579	1.14445	0.530649	2539.15	1.0112	81.6667
585	158	4200	775	32.3538	0.702919	0.427033	2241.51	0.884073	74.1667
585	158	4905	1447	48.6529	1.05159	0.456382	2341.57	0.908428	76.5
220	112	2989	1082	53.5371	1.36959	0.730357	3432.61	0.929567	74.6667
561	285	5000	776	33.7782	0.862651	1.03845	4172.2	0.970147	80.6667
220	112	436	78	21.1641	0.545771	0.814309	3701.33	1.01519	82
220	112	2557	1417	45.7982	1.27494	0.548221	2033.87	0.907487	73.8333
230	62	163	49	36.5045	0.7921	0.406531	2130.66	1.05937	87.8333
220	112	3302	542	43.8409	1.14373	1.57223	7644.51	0.964005	76.3333
220	112	968	132	20.5844	0.528486	2.07548	10132.3	0.977234	78
161	82	5000	1401	35.9243	0.894897	0.94328	3782.58	0.815115	65.1667
561	285	515	140	21.0964	0.511604	0.619953	3279.34	1.0344	82.8333
581	157	1777	209	99.5581	2.32312	1.31352	5136	1.07265	93.1667
561	285	5000	1809	39.8988	1.03837	1.03522	4423.51	0.926993	75
230	62	3300	226	34.1045	0.862688	1.21865	4148.66	0.945673	81.5
561	285	1119	213	39.4904	1.00873	1.57246	7973.84	1.10322	87.5
220	112	2699	140	18.4398	0.411133	0.8179	5177.94	0.827467	65.8333
285	77	509	55	33.1113	0.986803	0.93492	1859.08	1.09206	97.6667
220	112	959	123	18.1532	0.396093	0.443495	2583.12	0.842823	69
220	112	5000	1297	27.0774	0.647958	0.611232	3436.76	0.75923	60.6667
561	285	5000	5000	45.1091	1.11412	0.725828	3323.23	0.861485	70.6667
220	112	2987	847	31.7151	0.833668	0.551453	2447.61	0.878981	70.6667
557	283	2058	364	32.4808	0.779602	0.836738	4495.03	1.01844	82
561	285	5000	1163	30.7805	0.764301	0.767163	3539.28	0.911402	74.6667
581	157	2046	874	82.9818	2.36879	0.596984	1710.52	0.992858	84.3333
220	112	369	139	90.4265	2.2573	0.669504	2841.06	1.07334	89.1667
220	112	5000	2150	44.1187	1.18333	0.845253	3458.48	0.862485	69.6667
230	62	1512	93	24.3255	0.602404	1.62244	6782.86	0.970803	81.5
219	112	1243	244	44.6555	1.1913	0.90927	3546.72	1.02054	83.8333
220	112	4340	1173	65.5789	1.43015	1.08396	7214.39	0.926759	73.6667
561	285	2322	522	49.7721	1.27106	0.801594	3660.19	1.03661	83.6667
561	285	2423	569	21.6905	0.559361	0.456988	2180.69	0.909043	72.8333
561	285	5000	899	28.3502	0.762009	2.0375	6931.58	0.949947	79.8333
561	285	5000	1905	34.8905	0.804172	0.633752	3675.59	0.87996	70.5
263	134	16	8	39.2276	1.06011	0.817413	3370.07	1.29123	104.167
561	285	5000	1565	33.9712	0.826304	0.59073	2962.89	0.903558	73
561	285	5000	4937	52.7315	1.13536	0.5011	3594.19	0.872582	69
230	62	559	31	14.8939	0.384379	1.19618	4805.93	0.960125	79.8333
561	285	437	293	36.8128	0.869201	0.371815	2171.55	1.04952	83.3333
220	112	997	196	39.0228	0.956078	0.797415	3903.6	1.01712	81.8333
561	285	1798	369	27.7016	0.622343	0.602591	3644.85	0.977127	78.3333
220	112	96	60	38.4425	1.05334	0.408609	1498.6	1.11117	90.8333
561	285	5000	5000	52.2578	1.32597	0.404334	1934.73	0.837854	67.6667
561	285	5000	1654	23.4329	0.719768	0.727942	1732.21	0.864208	72.8333
220	112	1668	468	32.9584	0.907921	0.570406	2171.55	0.942263	76.3333
320	163	126	48	26.5193	0.758089	1.74549	6265.73	1.17511	94.3333
561	285	3246	4114	53.5178	1.32809	0.380031	1703.36	0.911076	75
561	285	5000	5000	51.7042	1.4225	0.440385	1762.78	0.863038	69.3333
220	112	5000	2783	56.6181	1.43131	1.49614	7248.7	0.867553	69.3333
220	112	3241	308	27.84	0.648863	1.2171	7327.74	0.913503	72.1667
585	158	3844	510	83.2068	2.0624	1.40835	5671.53	1.0213	85.1667
393	200	3018	748	54.3943	1.31649	0.803695	4449.57	0.989861	78.6667
220	112	98	5	6.57018	0.173379	0.880022	3675.59	0.866017	70.3333
220	112	139	89	42.6467	1.06353	0.39711	1698	1.08474	90
220	112	3797	684	50.1871	1.12648	1.10824	6733.99	0.94042	75.3333
561	285	5000	5000	98.4324	2.15536	1.26496	7512.14	0.888747	72
393	200	5000	1201	42.855	1.09093	0.961676	4759.46	0.937607	74.6667
561	285	4015	568	29.4301	0.69862	2.05962	11862.4	0.981624	77.5
383	195	45	14	59.5854	1.25545	0.997486	7314.51	1.27292	101
320	163	1036	237	31.7942	0.870701	0.675359	2703.34	1.02071	82
585	297	5000	5000	46.3136	1.13545	0.53683	2733.78	0.837601	67.5
561	285	2845	279	17.9795	0.472553	1.58522	6773.67	0.951713	77
220	112	5000	3468	47.7396	1.20346	1.15236	5556.11	0.826518	66.6667
212	108	2128	240	27.2807	0.694812	1.18825	6025.56	0.951921	75.5
561	285	5000	2021	30.3021	0.761954	0.76455	3521.98	0.859224	69.8333
220	112	4739	665	34.1166	0.863486	1.02615	4516.41	0.901563	73.8333
220	112	2042	989	99.1994	2.40341	2.45989	13312	0.971482	77.5
220	112	498	81	20.4967	0.559222	1.04591	4186.57	1.02278	82.1667
220	112	2116	374	37.9119	1.05635	2.19087	8252.44	0.99399	80.6667
561	285	5000	5000	90.0357	2.22864	0.942939	4729.45	0.882929	71.3333
230	62	171	30	59.9846	1.78315	0.590429	1834.52	1.12893	92.8333
220	112	351	67	21.7756	0.530171	0.836307	4765.92	1.02622	80.5
561	285	1949	299	25.5962	0.682922	1.07449	4096.72	1.02182	84.3333
220	112	3799	623	38.8751	1.06961	1.18458	4496.05	0.941786	76.3333
561	285	433	597	37.5036	1.00771	0.281809	1050.24	1.01685	84.1667
561	285	5000	2417	58.172	1.54719	0.766181	3313.94	0.9483	76.5
585	158	1780	204	54.4237	1.37185	0.848767	3238.29	1.06433	90
220	112	3592	690	50.9906	1.30035	1.37195	6981.88	0.956512	75.1667
200	102	309	122	26.7707	0.731092	2.43601	7334.37
275	74	5	5	1.64333	0.0459827	0.62975	1915.87	1.37082	116.333
220	112	1506	383	55.405	1.46329	0.839965	3403.26	1.00253	81.8333
220	112	5000	5000	72.032	1.79623	1.31783	6238.89	0.839738	68.5
220	112	1757	831	31.1222	0.798319	0.409109	2043.28	0.878247	69.8333
220	112	5000	2705	64.5455	1.56678	1.38314	7485.03	0.879557	70.1667
561	285	5000	5000	50.5325	1.17972	0.414215	2173.07	0.860507	70.1667
561	285	5000	1899	34.4707	0.908091	0.862743	3249.64	0.901657	74.5
220	112	556	108	36.6739	0.931581	0.90659	4293.39	1.06371	85.3333
561	285	5000	2645	71.4881	1.59536	0.896763	5049.7	0.944116	77.1667
220	112	2684	431	26.5523	0.714566	0.686763	2705.23	0.902148	73.3333
220	112	3051	662	60.7364	1.47865	1.85297	9293.82	0.973697	78.6667
585	158	1529	1381	42.5391	1.17016	0.296278	1015.62	0.935265	78.5
561	285	1993	1575	44.9871	1.08391	0.374279	1906.51	0.952007	77.3333
220	112	1162	213	65.1777	1.5683	1.39965	7347.64	1.04878	84.1667
220	112	767	119	26.647	0.687097	1.46171	6978.72	1.03033	81.8333
561	285	27	670	32.8413	0.920562	0.118906	401.466	1.02443	84.6667
220	112	5000	2381	31.8849	0.859483	0.814518	3386.62	0.787097	62.8333
585	158	4041	337	33.2176	0.885965	1.91871	6553.88	1.0093	85.5
220	112	86	100	21.399	0.559717	0.265477	973.948	0.999486	83.6667
220	112	3521	895	59.36	1.63151	1.62561	6110.55	0.957372	77
220	112	22	30	15.3606	0.401306	2.83297	13596.9	1.14848	90.3333
200	102	2943	2878	66.8215	1.57063	0.573957	2300.55	0.878035	71
220	112	2267	465	31.6361	0.760761	0.6103	3155.51	0.91022	73.1667
220	112	4206	1316	74.6799	1.63957	2.20571	13814.5	0.936097	75.1667
561	285	33	11	6.18239	0.17916	0.319548	1059.47	0.914526	73.6667
220	112	231	40	100.334	2.58345	1.40689	6512.54	1.1466	92.3333
220	112	3420	434	34.643	0.86128	1.34105	6685.48	0.941799	76.1667
220	112	5000	538	29.1797	0.753057	1.60686	7785.14	0.89675	71.6667
214	109	5	5	5.01127	0.146905	0.230978	720.646	0.97085	79
220	112	5000	4967	66.3169	1.63382	1.13314	5299.85	0.844956	68.5
561	285	5000	374	21.3002	0.441872	1.30703	9439.84	0.867418	69
561	285	5000	3121	33.076	0.880846	0.998312	3675.59	0.851631	69.6667
320	163	4776	263	17.5122	0.43991	0.853853	4116.84	0.826518	66.6667
220	112	16	14	15.4151	0.37041	1.11104	5328.67	1.15643	93.6667
561	285	2047	5000	63.5283	1.45502	0.282049	1510.71	0.884185	72.3333
561	285	5000	1883	27.3487	0.621257	0.703482	4210.08	0.803146	64.5
220	112	2277	1083	46.7926	1.19418	0.543904	2430.54	0.918131	75
220	112	2214	4777	93.0089	2.46605	0.677629	2525.37	0.885965	73.3333
230	62	95	724	268.313	7.03193	0.772119	2875.18	0.946063	79.6667
220	112	958	175	65.2718	1.53654	1.23568	6622.07	1.05938	86
561	285	3976	403	21.134	0.565202	1.19999	4985.13	0.951553	76.6667
585	158	5000	1136	33.8263	0.83371	0.768971	3190.46	0.87877	74
561	285	5000	5000	59.963	1.26679	0.643735	3993.79	0.845723	69
220	112	2952	139	17.578	0.405464	0.85785	4882.8	0.819099	66.3333
700	189	64	16	35.1399	0.928262	1.13358	3664.43	1.26963	104.333
220	112	3775	499	36.0909	0.853839	1.90446	10578.8	0.934627	74.8333
585	158	5000	950	26.7516	0.758319	0.487828	1471.88	0.880718	74.1667
220	112	5000	4540	60.8351	1.62719	2.21743	9641.59	0.850424	68
561	285	3800	825	43.8646	0.977239	0.716388	4521.02	0.980044	78.6667
561	285	5000	1313	33.9832	0.896336	0.691537	2954.94	0.931113	75.3333
220	112	919	278	108.119	2.61192	2.04634	11626.2	1.04175	81.8333
220	112	4084	1281	37.789	0.873516	0.569002	3220.78	0.853611	68.6667
220	112	2204	153	21.2926	0.476658	1.40775	8197.51	0.90072	72.6667
220	112	1036	781	45.6909	1.18927	0.408756	1904.66	0.944653	75.3333
220	112	4303	3059	85.846	2.25229	1.94997	8576.32	0.900416	72.5
585	158	1325	156	57.049	1.47737	0.831565	3265.71	1.08428	90.5
561	285	2891	5000	51.0459	1.2393	0.258932	1042.15	0.818691	69.1667
585	158	4680	365	25.4055	0.675444	0.739573	2488.11	0.93806	79.6667
561	285	5000	1491	61.011	1.5432	0.891117	4383.53	0.978473	78
[truncated: 1,228 more rows]

## Sheet:  PE 
Prior Risk for Early PE	Prior Risk for Late PE	Posterior Risk for Early PE	Posterior Risk for Late PE	PlGF Conc	PlGF MoM	PAPP-A MoM	PAPP-A Conc	MAP MoM	MAP
200	102	2269	365	38.9	0.61	1.09814	2932.82	0.972457	80.6667
334	90	1487	138	35.08	1.19561	1.8062	3315.49	1.05946	88.3333
671	341	16	13	30.7	0.929191	1.37164	4037.79	1.34823	109.667
52	27	5	5	8.5	0.207238	0.539193	2775.18	1.13121	91
230	62	29	12	15.9	0.431815	0.48722	1695.74	1.10287	92.3333
67	19	5	5	7.3	0.17378	0.686242	2631.08	1.04051	90
220	112	65	32	46.3	1.023	0.503957	3072.2	1.15695	94
230	62	146	22	29.5	0.872898	0.868704	2169.68	1.14209	98.3333
561	285	45	46	25.6	0.719223	0.414498	1283.36	1.18068	99
12	7	30	7	34.46	0.944113	0.842737	3272.34	1.05683	85.3333
230	76	743	68	23.9264	0.562322	1.413	4389.43	1.00877	82
52	27	116	21	29.467	0.608986	1.34705	9728.9	1.04247	83
220	112	97	43	26.9181	0.696205	0.544155	2586.17	1.10713	88
230	62	936	73	22.22	0.652006	0.942851	2308.8	0.999421	86.3333
220	112	958	780	49.0055	1.32031	0.416045	1404.67	0.954687	80.3333
334	90	15	6	7.28823	0.211924	0.387974	1226.38	0.998574	82.6667
230	62	271	151	85	2.1275	0.406764	1612.45	1.03908	88.1667
220	112	5	19	16.1029	0.427398	0.159588	677.786	1.11744	90.5
230	62	3654	198	23.0604	0.593406	0.784716	2420.13	0.867455	76
220	112	514	75	17.4244	0.48803	0.906968	3288.95	0.993838	81.1667
220	112	5	5	5.22184	0.157288	0.916446	2718.38	1.10375	89.6667
230	62	110	50	23.634	0.614577	0.314148	1243.12	1.02368	85.3333
220	112	818	99	19.829	0.518095	1.13133	5003.55	0.981817	79.6667
220	112	1325	214	44.4063	1.13526	1.41226	6655.73	1.03335	83.6667
220	112	122	92	28.3401	0.853792	0.359175	1013.67	1.06554	88.1667
132	67	6	8	13.7088	0.322881	1.58634	9125.15	1.16831	93
220	112	1456	276	74.5193	1.57068	1.47716	10914.5	1.03266	81.8333
275	74	28	11	17.7315	0.54147	1.16524	2938.78	1.20192	101.333
399	108	28	41	25.0284	0.713985	0.231411	488.856	1.11256	100.333
220	112	32	8	9.29755	0.220378	0.799346	4322.98	0.9943	80.6667
320	163	4031	571	33.1959	0.955418	1.29806	4090.7	0.965873	80
263	134	6	8	23.3572	0.539043	0.825066	4888.06	1.27557	101.833
52	27	27	13	32.5087	0.812496	0.484021	2010.71	1.10152	91.8333
220	112	1556	144	15.77	0.400814	0.506705	2492.55	0.819575	65.3333
220	112	42	25	24.54	0.644802	0.538764	2216.32	1.14631	93.3333
561	285	119	95	32.5	0.867913	0.38772	1698.7	1.13533	90.6667
54	15	5	5	17.1	0.41264	0.834477	4276.59	0.95708	77.6667
54	15	5	5	9.4	0.250228	0.20725	702.56	1.17504	99.6667
220	112	241	64	18.2	0.522086	1.96389	5886.28	1.06559	89
220	112	73	44	16.758	0.4	0.342842	1567.33	0.995332	81.6667
561	285	5000	3341	32.571	0.8	0.678469	3125.44	0.828464	67.3333
230	62	44	15	21.294	0.56	0.539857	1900.94	1.12714	95
162	318	422	2989	34.5	0.93	1.35	5454.51	0.99	80

## Sheet: PE+SGA 
Prior Risk for Early PE	Prior Risk for Late PE	Posterior Risk for Early PE	Posterior Risk for Late PE	PlGF Conc	PlGF MoM	PAPP-A MoM	PAPP-A Conc	MAP MoM	MAP
52	27	5	5	8.5	0.207238	0.539193	2775.18	1.13121	91
54	15	5	5	17.1	0.41264	0.834477	4276.59	0.95708	77.6667
561	285	119	95	32.5	0.867913	0.38772	1698.7	1.13533	90.6667
334	90	15	6	7.28823	0.211924	0.387974	1226.38	0.998574	82.6667
52	27	116	21	29.467	0.608986	1.34705	9728.9	1.04247	83
230	62	936	73	22.22	0.652006	0.942851	2308.8	0.999421	86.3333
399	108	28	41	25.0284	0.713985	0.231411	488.856	1.11256	100.333
220	112	122	92	28.3401	0.853792	0.359175	1013.67	1.06554	88.1667
52	27	27	13	32.5087	0.812496	0.484021	2010.71	1.10152	91.8333
220	112	1456	276	74.5193	1.57068	1.47716	10914.5	1.03266	81.8333
132	67	6	8	13.7088	0.322881	1.58634	9125.15	1.16831	93
54	15	5	5	9.4	0.250228	0.20725	702.56	1.17504	99.6667
220	112	42	25	24.54	0.644802	0.538764	2216.32	1.14631	93.3333
230	62	29	12	15.9	0.431815	0.48722	1695.74	1.10287	92.3333
220	112	32	8	9.29755	0.220378	0.799346	4322.98	0.9943	80.6667

## Sheet: SGA without PE
Prior Risk for Early PE	Prior Risk for Late PE	Posterior Risk for Early PE	Posterior Risk for Late PE	PlGF Conc	PlGF MoM	PAPP-A MoM	PAPP-A Conc	MAP MoM	MAP
320	163	14	16	15.767	0.474845	0.914607	2904.94	1.21808	97.8333
220	112	2453	581	56.8024	1.5245	1.0809	4322.97	0.978435	79.3333
585	297	5000	2320	33.3836	0.851622	0.917494	4113.7	0.874947	70.8333
320	163	1506	257	50.169	1.24494	1.22142	5712.75	1.05054	85.1667
561	285	4412	2320	40.6549	1.08578	0.471676	1825.9	0.920786	75.6667
561	285	1037	302	154.341	3.22643	2.16639	13077.8	1.08386	88.8333
561	285	615	851	59.627	1.43358	0.315875	1596.83	1.01842	82.8333
320	163	1463	318	59.7977	1.54203	0.944958	4130.91	1.04218	84
220	112	212	34	11.6797	0.276391	0.320454	1534.66	0.834186	69
561	285	21	27	18.0758	0.520055	0.53333	1747.64	1.20646	98.3333
561	285	5000	2298	62.6288	1.70622	1.23891	4523.11	0.957605	78.8333
220	112	327	65	24.7537	0.605559	1.09086	5513.08	1.06168	85.6667
220	112	1489	404	44.3234	1.12949	3.18056	13892.6	1.00815	82.6667
70	36	5	5	39.2488	0.927785	0.992479	5416.4	1.56425	124
585	297	928	198	24.1364	0.645497	0.807236	3353.5	1.05085	84.6667
220	112	727	127	31.5688	0.839821	1.7052	7470.92	1.05603	84.3333
320	163	3587	862	45.4807	1.0379	0.712901	2245.03	0.94137	79
220	112	1476	210	36.6678	0.815651	1.09942	6549.68	0.995393	80
220	112	167	63	40.6742	1.08724	0.543938	2329.42	1.11024	89
561	285	5000	5000	41.4912	1.15113	0.991852	3736.05	0.854339	69.3333
200	102	1268	234	39.3705	1.12694	0.944924	2036.48	1.0128	84.6667
561	285	3023	1068	32.3884	0.748402	0.442535	2629.76	0.92113	73.5
220	112	427	139	48.7342	1.26223	3.24687	15583.4	1.10187	86.6667
275	74	5	5	1.64333	0.0459827	0.62975	1915.87	1.37082	116.333
561	285	5000	2121	34.4216	0.919398	2.60221	11752.8	0.901973	71.6667
220	112	5	63	15.9	0.517545	0.0889612	195.12	1.06324	88
561	285	1349	467	35.4162	0.87487	0.503508	2639.29	1.01202	80.5
200	67	249	70	27.3195	0.656414	2.38979	7647.43	0	0
320	163	58	27	41.1607	1.05823	0.562077	2327.97	1.1987	99.1667
220	112	1162	283	23.6454	0.654695	0.500232	2002.34	0.925277	74.3333
200	67	148	8	9.4125	0.231263	0.755757	2514.23	0.903981	73
334	111	13	14	14.5901	0.426921	0.399088	1088.86	1.14917	94.6667
561	285	5000	5000	66.8939	1.69242	0.831778	3768.15	0.901822	73.5
561	285	1381	703	26.5846	0.650437	0.350885	1720.25	0.933013	75.6667
220	112	14	18	25.3425	0.649967	0.372979	1779.81	1.17323	94
230	76	5000	784	54.9389	1.29981	1.63799	7558.85	0.920316	76
671	341	16	13	30.7	0.929191	1.37164	4037.79	1.34823	109.667
220	112	143	66	30.1514	0.795659	0.476229	1989.07	1.08355	88
102	52	5	5	59.123	1.27413	0.529592	2843.94	1.50366	125.667
214	109	5000	4762	53.3346	1.49588	0.914798	3145.51	0.837408	69
561	285	5000	5000	71.3205	1.78401	0.519748	2222.39	0.882646	73.1667
220	112	2358	472	50.5221	1.21791	0.967116	4706.76	0.975344	79.8333
561	285	5	5	6.46241	0.14455	0.791653	4780.6	1.14085	92.1667
561	285	5000	896	24.6481	0.7073	1.09679	3790.34	0.920123	74.3333
230	62	3129	625	53.4285	1.25996	0.661193	3488.07	0.918527	75.3333
220	112	5000	3536	59.146	1.52353	0.741775	3466.94	0.863583	68.8333
320	163	83	37	10.9838	0.271021	0.261027	1177.1	0.893759	73.5
220	112	5	23	7.98977	0.223806	0.0860708	326.497	0.86336	69.3333
220	112	738	105	18.0902	0.499737	0.701455	2870.93	0.956335	75.8333
220	112	24	31	21.6267	0.578653	0.327904	1455.39	1.11117	89.3333
220	112	643	100	25.2408	0.622546	1.26561	3699.69	1.02701	84.3333
320	163	5000	1778	44.2463	1.27949	1.17664	4035.5	0.912777	73.8333
585	158	1529	1381	42.5391	1.17016	0.296278	1015.62	0.935265	78.5
220	112	5000	2806	37.5601	1.05523	0.647626	2329.42	0.826941	67
230	62	3799	1325	51.49	1.27691	0.55987	2219.37	0.871718	73.8333
220	112	565	123	30.7131	0.878569	0.746965	2566.98	1.04525	85.3333
220	112	2483	5000	136.207	3.25681	1.80382	9391.61	0.878579	71.6667
220	112	3227	397	32.1929	0.82173	1.24893	6259.95	0.940557	74.1667
220	112	547	118	75.3569	1.99103	1.01044	4062.98	1.08486	88.6667
557	283	5000	3437	44.1346	1.22961	1.05951	3785.23	0.900296	72.6667
220	112	476	77	22.5088	0.547497	1.2029	6033.31	1.02733	83
561	285	5000	4469	54.8676	1.45524	0.698084	2681.89	0.904631	74.5
214	109	2704	539	54.927	1.43859	1.49257	5723.13	0.980843	77.6667
230	62	163	49	36.5045	0.7921	0.406531	2130.66	1.05937	87.8333
220	112	5000	1194	45.3458	1.25196	2.29722	8852.58	0.919436	74.3333
220	112	258	57	26.2236	0.534461	1.4131	7001.61	1.06493	84.8333
230	62	256	29	101.225	2.47285	0.95183	3827.43	1.12729	96
200	67	372	64	33.3242	0.742385	1.24231	5188.02
220	112	3026	1502	40.428	0.935657	0.47435	2875.06	0.859204	68.3333
220	112	104	23	58.9901	1.40035	1.00741	3747.2	1.19578	95.1667
64	33	120	40	37.8709	0.941405	0.543797	2489.8	1.04232	85.5
220	112	1551	132	16.6176	0.452249	2.0212	7968.46	0.916728	73.8333
220	112	4962	608	28.5833	0.750518	0.949609	4279.36	0.879132	70.5
220	112	3541	1046	64.5246	1.66032	1.1858	4764.23	0.946094	78.6667
561	285	5	5	3.14204	0.0817245	2.08329	9826.14	0.942381	75
220	112	541	78	20.0405	0.502595	0.98636	4497.02	0.99919	80.6667
220	112	826	175	61.8114	1.66709	2.2417	8631.3	1.07439	87.6667
561	285	1003	673	30.2482	0.850984	0.355146	1267.74	0.984089	79.8333
220	112	5000	1216	27.9095	0.630256	0.59748	3349.51	0.755442	61.3333
220	112	5	17	10.7188	0.355979	0.198327	382.789	1.08428	90.6667
220	112	268	78	27.201	0.680338	0.601094	2854.46	1.05114	85
320	163	5000	5000	41.7631	1.06333	1.2022	5317	0.801064	65
230	62	316	49	69.3403	1.87761	0.68173	2583.48	1.09947	90.8333
220	112	220	94	25.2611	0.650805	0.439767	1989.81	1.02679	83

## Sheet: SGA（all）
Prior Risk for Early PE	Prior Risk for Late PE	Posterior Risk for Early PE	Posterior Risk for Late PE	PlGF Conc	PlGF MoM	PAPP-A MoM	PAPP-A Conc	MAP MoM	MAP
320	163	14	16	15.767	0.474845	0.914607	2904.94	1.21808	97.8333
220	112	2453	581	56.8024	1.5245	1.0809	4322.97	0.978435	79.3333
585	297	5000	2320	33.3836	0.851622	0.917494	4113.7	0.874947	70.8333
52	27	5	5	8.5	0.207238	0.539193	2775.18	1.13121	91
320	163	1506	257	50.169	1.24494	1.22142	5712.75	1.05054	85.1667
561	285	4412	2320	40.6549	1.08578	0.471676	1825.9	0.920786	75.6667
54	15	5	5	17.1	0.41264	0.834477	4276.59	0.95708	77.6667
561	285	1037	302	154.341	3.22643	2.16639	13077.8	1.08386	88.8333
561	285	615	851	59.627	1.43358	0.315875	1596.83	1.01842	82.8333
320	163	1463	318	59.7977	1.54203	0.944958	4130.91	1.04218	84
220	112	212	34	11.6797	0.276391	0.320454	1534.66	0.834186	69
561	285	21	27	18.0758	0.520055	0.53333	1747.64	1.20646	98.3333
230	62	29	12	15.9	0.431815	0.48722	1695.74	1.10287	92.3333
561	285	5000	2298	62.6288	1.70622	1.23891	4523.11	0.957605	78.8333
220	112	327	65	24.7537	0.605559	1.09086	5513.08	1.06168	85.6667
220	112	1489	404	44.3234	1.12949	3.18056	13892.6	1.00815	82.6667
70	36	5	5	39.2488	0.927785	0.992479	5416.4	1.56425	124
585	297	928	198	24.1364	0.645497	0.807236	3353.5	1.05085	84.6667
220	112	727	127	31.5688	0.839821	1.7052	7470.92	1.05603	84.3333
320	163	3587	862	45.4807	1.0379	0.712901	2245.03	0.94137	79
220	112	1476	210	36.6678	0.815651	1.09942	6549.68	0.995393	80
220	112	167	63	40.6742	1.08724	0.543938	2329.42	1.11024	89
561	285	5000	5000	41.4912	1.15113	0.991852	3736.05	0.854339	69.3333
200	102	1268	234	39.3705	1.12694	0.944924	2036.48	1.0128	84.6667
561	285	3023	1068	32.3884	0.748402	0.442535	2629.76	0.92113	73.5
220	112	427	139	48.7342	1.26223	3.24687	15583.4	1.10187	86.6667
275	74	5	5	1.64333	0.0459827	0.62975	1915.87	1.37082	116.333
561	285	5000	2121	34.4216	0.919398	2.60221	11752.8	0.901973	71.6667
220	112	5	63	15.9	0.517545	0.0889612	195.12	1.06324	88
561	285	1349	467	35.4162	0.87487	0.503508	2639.29	1.01202	80.5
200	67	249	70	27.3195	0.656414	2.38979	7647.43	0	0
320	163	58	27	41.1607	1.05823	0.562077	2327.97	1.1987	99.1667
561	285	119	95	32.5	0.867913	0.38772	1698.7	1.13533	90.6667
220	112	1162	283	23.6454	0.654695	0.500232	2002.34	0.925277	74.3333
200	67	148	8	9.4125	0.231263	0.755757	2514.23	0.903981	73
334	90	15	6	7.28823	0.211924	0.387974	1226.38	0.998574	82.6667
52	27	116	21	29.467	0.608986	1.34705	9728.9	1.04247	83
334	111	13	14	14.5901	0.426921	0.399088	1088.86	1.14917	94.6667
561	285	5000	5000	66.8939	1.69242	0.831778	3768.15	0.901822	73.5
561	285	1381	703	26.5846	0.650437	0.350885	1720.25	0.933013	75.6667
220	112	14	18	25.3425	0.649967	0.372979	1779.81	1.17323	94
230	76	5000	784	54.9389	1.29981	1.63799	7558.85	0.920316	76
671	341	16	13	30.7	0.929191	1.37164	4037.79	1.34823	109.667
230	62	936	73	22.22	0.652006	0.942851	2308.8	0.999421	86.3333
220	112	143	66	30.1514	0.795659	0.476229	1989.07	1.08355	88
102	52	5	5	59.123	1.27413	0.529592	2843.94	1.50366	125.667
214	109	5000	4762	53.3346	1.49588	0.914798	3145.51	0.837408	69
399	108	28	41	25.0284	0.713985	0.231411	488.856	1.11256	100.333
561	285	5000	5000	71.3205	1.78401	0.519748	2222.39	0.882646	73.1667
220	112	2358	472	50.5221	1.21791	0.967116	4706.76	0.975344	79.8333
220	112	122	92	28.3401	0.853792	0.359175	1013.67	1.06554	88.1667
561	285	5	5	6.46241	0.14455	0.791653	4780.6	1.14085	92.1667
561	285	5000	896	24.6481	0.7073	1.09679	3790.34	0.920123	74.3333
230	62	3129	625	53.4285	1.25996	0.661193	3488.07	0.918527	75.3333
220	112	5000	3536	59.146	1.52353	0.741775	3466.94	0.863583	68.8333
320	163	83	37	10.9838	0.271021	0.261027	1177.1	0.893759	73.5
220	112	5	23	7.98977	0.223806	0.0860708	326.497	0.86336	69.3333
220	112	738	105	18.0902	0.499737	0.701455	2870.93	0.956335	75.8333
220	112	24	31	21.6267	0.578653	0.327904	1455.39	1.11117	89.3333
220	112	643	100	25.2408	0.622546	1.26561	3699.69	1.02701	84.3333
320	163	5000	1778	44.2463	1.27949	1.17664	4035.5	0.912777	73.8333
585	158	1529	1381	42.5391	1.17016	0.296278	1015.62	0.935265	78.5
220	112	5000	2806	37.5601	1.05523	0.647626	2329.42	0.826941	67
230	62	3799	1325	51.49	1.27691	0.55987	2219.37	0.871718	73.8333
220	112	565	123	30.7131	0.878569	0.746965	2566.98	1.04525	85.3333
52	27	27	13	32.5087	0.812496	0.484021	2010.71	1.10152	91.8333
220	112	1456	276	74.5193	1.57068	1.47716	10914.5	1.03266	81.8333
220	112	2483	5000	136.207	3.25681	1.80382	9391.61	0.878579	71.6667
220	112	3227	397	32.1929	0.82173	1.24893	6259.95	0.940557	74.1667
220	112	547	118	75.3569	1.99103	1.01044	4062.98	1.08486	88.6667
557	283	5000	3437	44.1346	1.22961	1.05951	3785.23	0.900296	72.6667
220	112	476	77	22.5088	0.547497	1.2029	6033.31	1.02733	83
561	285	5000	4469	54.8676	1.45524	0.698084	2681.89	0.904631	74.5
214	109	2704	539	54.927	1.43859	1.49257	5723.13	0.980843	77.6667
230	62	163	49	36.5045	0.7921	0.406531	2130.66	1.05937	87.8333
220	112	5000	1194	45.3458	1.25196	2.29722	8852.58	0.919436	74.3333
220	112	258	57	26.2236	0.534461	1.4131	7001.61	1.06493	84.8333
132	67	6	8	13.7088	0.322881	1.58634	9125.15	1.16831	93
230	62	256	29	101.225	2.47285	0.95183	3827.43	1.12729	96
200	67	372	64	33.3242	0.742385	1.24231	5188.02
220	112	3026	1502	40.428	0.935657	0.47435	2875.06	0.859204	68.3333
54	15	5	5	9.4	0.250228	0.20725	702.56	1.17504	99.6667
220	112	104	23	58.9901	1.40035	1.00741	3747.2	1.19578	95.1667
64	33	120	40	37.8709	0.941405	0.543797	2489.8	1.04232	85.5
220	112	1551	132	16.6176	0.452249	2.0212	7968.46	0.916728	73.8333
220	112	4962	608	28.5833	0.750518	0.949609	4279.36	0.879132	70.5
220	112	3541	1046	64.5246	1.66032	1.1858	4764.23	0.946094	78.6667
561	285	5	5	3.14204	0.0817245	2.08329	9826.14	0.942381	75
220	112	541	78	20.0405	0.502595	0.98636	4497.02	0.99919	80.6667
220	112	826	175	61.8114	1.66709	2.2417	8631.3	1.07439	87.6667
561	285	1003	673	30.2482	0.850984	0.355146	1267.74	0.984089	79.8333
220	112	5000	1216	27.9095	0.630256	0.59748	3349.51	0.755442	61.3333
220	112	42	25	24.54	0.644802	0.538764	2216.32	1.14631	93.3333
220	112	5	17	10.7188	0.355979	0.198327	382.789	1.08428	90.6667
220	112	268	78	27.201	0.680338	0.601094	2854.46	1.05114	85
320	163	5000	5000	41.7631	1.06333	1.2022	5317	0.801064	65
230	62	316	49	69.3403	1.87761	0.68173	2583.48	1.09947	90.8333
220	112	220	94	25.2611	0.650805	0.439767	1989.81	1.02679	83
220	112	32	8	9.29755	0.220378	0.799346	4322.98	0.9943	80.6667

## Sheet: unaffected group by SGA 
Prior Risk for Early PE	Prior Risk for Late PE	Posterior Risk for Early PE	Posterior Risk for Late PE	PlGF Conc	PlGF MoM	PAPP-A MoM	PAPP-A Conc	MAP MoM	MAP
200	102	1096	471	42.7105	1.12628	0.507012	1626.35	0.963691	76.8333
200	102	74	23	52.7	4.72	2.40307	8392.86	1.22037	97.6667
220	112	3886	858	28.9	5.21	0.623109	2332.87	0.865783	70.3333
200	102	52	14	51.7	1.55372	2.22405	3960.74	1.24904	105.667
160	82	1895	561	56.1	1.33172	3.09589	13777.2	0.968317	76.3333
220	112	831	149	33.8	0.873277	1.91479	9141.86	1.05008	84
561	285	793	154	46.2	1.32803	1.78301	5542.65	1.14035	94.6667
561	285	5000	5000	31.7	0.9894	1.01132	2798.79	0.81638	65
561	285	5000	598	22.1	0.657768	1.12014	3048.07	0.944965	78.6667
220	112	76	31	27.2	0.817151	0.628711	1790.62	1.14987	95
561	285	2861	627	25.6	0.774914	0.616242	1546.52	0.969668	81
230	62	1579	134	42.1	1.15089	1.44019	4113.9	1.02477	88.6667
230	62	273	39	46.5	1.28983	0.680796	2135.09	1.10933	93.6667
49	25	580	51	21.1	0.550505	1.93188	7566.03	0.909689	76
585	158	4944	1381	45.1	1.10962	0.48205	2135.09	0.918053	76.3333
561	285	4545	1532	61.7	1.296	0.65323	4507.59	0.964819	77.3333
263	134	17	10	32	0.921018	1.57772	4801.22	1.29635	108
561	285	3200	377	19.1	0.521504	0.740032	2661.02	0.92893	76.6667
561	285	28	48	24.3	0.618277	0.325021	1470.62	1.16287	94
220	112	1583	223	27.5	0.798326	1.04246	3338.99	0.985953	80.6667
220	112	841	148	46.4	1.46492	1.31046	3361.29	1.07068	86.3333
220	112	1072	167	33.5	0.815756	1.69496	8697.34	1.0271	82.6667
585	158	3206	523	47.1	1.13394	0.60693	2819.59	0.986342	82
220	112	1709	464	55.5	1.30221	0.746055	3913.98	0.981983	80
561	285	3791	654	27.4	0.74545	0.716567	2803.64	0.958969	77.3333
585	158	5000	1203	47	1.01723	1.50751	8668.38	0.91173	75.3333
230	62	297	219	48.8	1.30485	0.308837	1071.07	1.002	84.6667
220	112	661	152	27.9	0.774914	0.638623	2145.2	1.01078	82.8333
220	112	2251	492	40.9755	1.12252	0.812219	3036.26	0.964017	78.3333
220	112	5000	4122	50.8122	1.14895	1.51939	9023.15	0.802341	65
220	112	3990	5000	58.1968	1.62286	0.555567	1881.49	0.83529	69
220	112	3574	1103	40.2706	1.04451	0.649296	2764.6	0.896019	73.1667
230	76	2786	515	60.1892	1.6263	1.01238	3216.46	0.96467	82
156	80	2794	988	57.3547	1.56149	0.955754	2637.56	0.923517	75.5
320	163	1329	421	26.4777	0.730705	0.468453	1526.03	0.947531	79.5
220	112	415	111	21.322	0.534515	0.479124	2530.63	0.969246	77
561	285	5000	5000	73.2782	1.86401	1.26515	6366.96	0.898249	71.3333
320	163	157	38	53.9376	1.55054	0.75458	2593.15	1.17794	96.1667
220	112	569	101	21.7725	0.569894	0.722477	3216.46	0.995577	80
561	285	1317	526	18.5776	0.573983	0.368489	983.855	0.928785	76
561	285	5000	4583	74.0709	1.80541	0.582932	2969.35	0.923283	75
561	285	1427	253	42.4592	1.06615	1.4613	6855.52	1.09015	88.3333
320	163	605	179	36.6541	0.9633	0.592891	2018.7	1.05244	88
334	90	315	62	53.4717	1.39354	0.546428	1958.91	1.1053	93.6667
320	163	857	198	35.2976	1.07736	0.73816	1909.65	1.05481	87.6667
275	74	166	29	86.6206	2.52591	3.67439	9605.23	1.17031	100
220	112	203	103	25.9395	0.75142	3.46391	11484.6	1.10488	89
274	139	18	22	17.5983	0.425843	1.85164	9899.28	1.19261	95.3333
561	285	445	109	34.9435	0.881674	1.35559	6567.77	1.14701	91.6667
561	285	5000	797	18.012	0.493413	0.532405	2065.57	0.81806	66.6667
220	112	1514	169	23.1474	0.589578	1.60657	7436.86	0.96447	77.6667
320	163	593	113	43.0901	1.01238	1.42907	8096.49	1.10687	88.3333
320	163	480	243	126.358	3.31239	0.809092	3591.13	1.05727	85
220	112	920	143	26.32	0.679388	0.873507	4151.45	0.998092	79.3333
561	285	5000	5000	48.4782	1.33799	0.91739	3251.77	0.869346	71.3333
320	163	1175	265	37.7796	0.990454	0.715764	2882.51	1.02576	82.6667
320	163	723	133	30.0394	0.80693	1.37944	4893.65	1.07479	87.6667
320	163	10	13	10.0401	0.284824	1.11474	3949.07	1.14904	93.3333
320	163	2503	594	71.7433	1.82783	1.96225	8584.11	1.01653	83.3333
200	102	3061	357	32.3323	0.776822	1.21268	4728.29	0.930667	75
200	102	65	26	13.6993	0.358715	0.471599	1444.11	1.01338	82.1667
200	102	443	86	23.7693	0.604035	1.83917	6442.95	1.04388	83.5
200	102	194	30	13.0751	0.33795	0.74616	2105.48	0.97235	81.3333
561	285	14	51	19.4362	0.550313	0.237274	808.005	1.14558	93.6667
320	163	260	91	70.7297	1.66807	0.571209	3155.61	1.12048	90.5
220	112	2595	504	48.193	1.25271	2.13847	8503.39	0.984742	81.3333
320	163	1755	1539	68.9723	1.6427	0.480058	2356.13	0.950802	77.3333
561	285	987	432	47.3558	1.18004	0.484001	2277.47	1.04504	85.3333
220	112	2481	381	23.3035	0.61175	0.597381	2495.08	0.874225	71
274	139	64	32	24.4261	0.551445	1.51923	7797.1	1.16349	94.6667
320	163	1272	410	28.9168	0.852033	0.507252	1406.3	0.974445	81.6667
320	163	4540	953	48.9346	1.28731	1.05519	4672.51	0.957548	76.3333
561	285	5000	879	24.0281	0.658438	0.617146	2376.22	0.904855	73.8333
220	112	1147	380	90.8384	2.33547	1.06994	5170.72	1.0177	80.6667
320	163	1558	194	26.7161	0.562833	0.892577	6579.64	0.964627	76
334	90	2570	245	55.5524	1.37149	1.28249	5654.56	1.0175	84.6667
561	285	844	557	25.148	0.765545	0.345927	901.753	0.983859	81.6667
561	285	4755	1072	61.2427	1.66618	2.04254	7991.65	1.0127	81.6667
320	163	1315	493	129.375	2.81613	2.30909	14287.2	1.03156	83
200	102	652	60	13.8775	0.364517	0.617258	1644.86	0.889859	74.5
220	112	2882	751	57.5341	1.50657	2.4499	9926.19	0.971898	79.3333
200	102	1887	455	52.6888	1.38294	0.893952	2821.9	0.981338	79.1667
561	285	765	155	44.7902	0.97869	1.13776	7401.82	1.1175	89.1667
561	285	5000	3087	72.7967	1.83572	1.29614	5748.23	0.943459	77.1667
200	102	3084	451	38.4342	1.00594	1.42068	4210.76	0.954409	78.5
320	163	1738	314	40.876	1.17172	1.01019	3169.03	1.02965	85.5
274	139	1202	897	122.175	3.26393	1.09646	3827.85	0.984335	81.1667
220	112	271	59	22.158	0.6063	0.972324	3290.1	1.06845	89
320	163	269	62	45.9792	1.26908	0.849069	3102.48	1.14733	93.5
561	285	1605	509	30.7889	0.833504	0.51617	1870.21	0.998854	82.3333
220	112	1339	233	50.8122	1.36786	1.3749	5843.45	1.03731	83.3333
561	285	2074	335	32.2961	0.872911	1.32903	4419.47	1.04908	88.5
220	112	256	100	26.6563	0.641173	0.452194	2303.39	1.01858	82.6667
220	112	245	152	47.868	1.11899	0.401268	2153.68	1.05049	85.3333
220	112	964	188	27.1688	0.669382	0.626442	2868.19	0.967139	79.3333
200	102	1651	156	21.2782	0.550818	1.07767	3322.84	0.932159	76.1667
200	102	5000	1320	47.7353	1.11171	1.50147	5779.8	0.881601	72.3333
200	102	2604	522	55.3407	1.35144	1.97131	7733.32	0.97896	78.1667
320	163	373	86	26.9969	0.692701	0.940386	3954.46	1.08661	89.6667
320	163	1378	196	19.4	0.570333	0.765111	2339.52	0.965012	78
320	163	1138	754	55.6875	1.34256	0.44183	2446.15	0.981472	78
320	163	3726	681	59.4935	1.33413	1.58737	10049.3	0.98877	78.6667
585	158	5000	516	30.5826	0.812223	0.701762	2349.47	0.943048	80.8333
200	102	5	66	27.5056	0.678118	0.0433478	163.462	1.12391	90.3333
200	102	164	44	24.7751	0.628728	1.44148	5127.11	1.1092	88.5
220	112	430	82	28.1393	0.791091	1.26425	4153.35	1.07999	89.6667
561	285	1915	308	28.329	0.778782	1.13848	4124.98	1.03929	85.6667
220	112	5000	1388	56.2801	1.46667	1.24563	5425.97	0.917869	74.6667
200	102	17	12	12.5085	0.310702	0.554805	1996.45	1.07689	86.5
200	102	192	47	35.7485	0.863612	0.89078	3029.19	1.11791	92.1667
200	67	568	261	24.5358	0.706385	0.317428	604.251	0.912979	78.6667
200	102	689	319	123.496	3.30988	2.04391	6071.41	1.02462	83.5
561	285	4338	845	43.3376	1.03499	0.827962	4106.18	0.984983	81
220	112	656	118	74.0452	1.74454	1.39016	8306.32	1.08934	86.1667
200	102	2392	476	52.2155	1.40632	1.28116	3424.52	0.981481	80.6667
220	112	3327	530	34.8913	1.0351	1.92382	6110.37	0.958691	77
220	112	409	78	30.2595	0.676413	1.05071	3736.59	1.05995	87.1667
200	102	5000	589	32.6094	0.784962	1.10746	4478.56	0.889525	70.6667
230	62	2413	164	32.1796	0.814697	1.61571	6071.41	0.971201	82.3333
561	285	2192	1069	23.4973	0.654401	0.351225	1226.17	0.896312	73.6667
561	285	369	823	36.4931	1.03952	0.241533	757.704	1.00133	83
561	285	2923	557	58.3077	1.54464	1.18184	5460.78	1.04438	82.6667
585	158	5000	675	76.8692	1.80505	0.642605	3364.35	1.00464	82.5
220	112	115	35	28.3512	0.720357	0.97391	4313.88	1.14027	92.5
220	112	1118	195	54.4151	1.3345	1.22976	5526.04	1.04685	86.8333
320	163	1603	312	31.3242	0.725562	0.653962	2152.29	0.970258	80.1667
200	54	1690	151	37.9996	0.993392	2.10655	5500.85	1.00118	84.8333
220	112	178	36	46.0376	1.13782	0.904524	2809.86	1.15229	93.6667
561	285	2169	177	13.3202	0.391035	1.37821	2483.73	0.934693	76.8333
220	112	5000	4375	44.5142	1.08846	1.10519	3305.24	0.788472	64.5
220	112	717	87	19.6396	0.436398	1.92509	7111.22	0.966741	79
561	285	311	88	32.886	0.829069	0.94173	2496.09	1.14957	95.1667
383	195	45	28	25.2712	0.645527	1.32992	3551.88	1.22065	100.833
200	102	121	31	19.2409	0.405155	1.25044	5966.91	1.05694	86.1667
220	112	1444	384	85.4925	2.12755	1.35565	6737.99	1.01763	81.6667
274	139	1370	815	49.1283	1.18967	0.448708	2152.05	0.954773	77.3333
318	162	5000	5000	65.7017	1.51952	0.563711	3742.87	0.853212	66.8333
200	102	467	305	191.823	3.94007	2.37167	12435.5	1.02382	82.1667
230	62	317	79	39.1	1.02295	0.450767	1192.43	1.04696	93.3333
220	112	5000	2852	44.7442	1.1313	0.517486	2502.65	0.835206	67.3333
200	102	105	31	37.2741	0.792733	1.121	6043.56	1.15572	90.3333
230	62	2559	321	75.8482	1.72575	1.68861	9154.11	0.988813	81.3333
200	102	5000	5000	98.7528	2.03445	0.981642	4421.41	0.846358	69.6667
585	158	5000	2403	73.8222	1.96495	0.830587	2969.44	0.927788	78
200	102	3929	621	39.4619	0.896219	0.931649	3763.04	0.906334	74.3333
561	285	5000	5000	71.7207	1.72667	0.834366	4315.19	0.8742	70.8333
220	112	2389	335	27.7608	0.757229	0.858712	3351.86	0.937628	76.3333
561	285	5000	3231	50.7061	1.16571	0.668189	3150.05	0.901471	75.3333
318	162	631	120	38.2971	1.0431	1.55574	6739.42	1.10571	87.6667
561	285	5000	5000	103.947	2.59835	1.33821	6877.39	0.906363	72.3333
220	112	5	5	5.92889	0.143597	0.522464	2601.36	0.974968	79.5
561	285	5000	1738	41.6426	1.23794	0.858858	2651.26	0.950729	77.5
320	163	1250	362	35.7456	0.934315	0.569373	2302.22	0.995584	82
220	112	96	34	28.1288	0.724075	0.736884	3516.32	1.13578	91
220	112	5000	1291	26.826	0.755005	0.603446	2170.51	0.814599	66
220	112	2027	461	19.0554	0.508395	0.395746	1732.65	0.794246	64
220	112	23	13	32.8556	0.904097	0.598901	2361.14	1.22506	98.6667
220	112	1717	220	26.9264	0.723783	1.66338	7123.44	0.981335	78.6667
220	112	521	175	40.8122	0.914583	0.523359	2570.32	1.0205	85.3333
230	62	98	18	27.0574	0.748733	0.81139	2796.07	1.14694	95.3333
220	112	1695	618	90.9646	2.26217	1.15668	5662.31	0.990194	79.6667
561	285	182	84	22.7533	0.602913	0.589619	2605.11	1.11446	89.6667
561	285	5000	605	23.8582	0.691992	1.03346	3157.84	0.953988	78.6667
230	117	475	122	32.8311	0.825506	1.0039	4767.29	0	0
220	112	5000	986	45.5583	1.20698	1.78669	7768.69	0.925461	74
220	112	555	238	36.8325	0.900413	0.448005	2514.57	0.996071	78.3333
587	298	787	247	28.6054	0.629984	1.55736	9592.19	0	0
220	112	1210	528	44.7902	1.25067	0.53276	1978.4	0.971978	78.3333
220	112	934	194	69.7184	1.89859	1.24078	4741.25	1.05671	86.3333
561	285	636	226	19.7434	0.493478	0.410607	1664.76	0.973623	81.5
561	285	5000	5000	64.9984	1.61002	0.701377	3566.42	0.892249	71.3333
220	112	1135	53	12.4372	0.332343	1.0389	4415.43	0.87004	69.8333
230	62	533	52	20.3193	0.519347	0.629444	2329.61	0.978549	83.1667
561	285	242	69	14.7488	0.381787	1.07511	4683.19	1.06129	86.3333
220	112	81	22	38.4342	1.04707	1.10117	4806.61	1.19972	95
220	112	5	5	7.61861	0.226297	0.663036	1984.01	1.16664	93.6667
220	112	5000	893	40.8973	1.00831	1.02289	5785.08	0.903966	71
263	134	23	12	37.5406	0.987834	1.79668	7854.25	1.28619	103.667
561	285	4600	779	50.4083	1.26423	1.39709	5170.72	1.01385	86.1667
220	112	2093	1445	84.6151	2.04602	0.738465	4214.6	0.940084	74.3333
220	112	1126	110	17.1581	0.489505	1.17524	4030.72	0.951926	77
561	285	1282	296	20.9432	0.555529	0.53422	2300.14	0.973544	78.6667
320	163	1829	266	31.5217	0.838204	1.26995	4953.59	1.01446	83.3333
220	112	4002	1005	35.3239	0.966054	0.69319	2689.37	0.88964	72.5
320	163	4998	3264	68.9364	1.82385	0.796421	3377.35	0.907303	73.5
561	285	687	74	11.9754	0.305433	0.681718	3253.07	0.929845	74.5
561	285	135	60	19.0696	0.53843	1.04965	3196.04	1.14965	96.6667
585	158	5000	583	41.8449	1.24263	1.04185	2718.06	0.987157	83.5
320	163	46	259	20.7874	0.553053	0.154588	560.11	0.962459	79.3333
200	102	3178	798	58.13	1.57759	1.32632	4021.83	0.954702	76.8333
274	139	5000	1394	33.9832	0.822758	1.29099	5572.21	0.842257	70.3333
320	163	177	55	22.4662	0.541293	1.23638	6320.63	1.10848	88.8333
320	163	4046	922	51.9534	1.38093	1.02253	4027.87	0.965708	78.5
383	195	55	19	51.3529	1.16378	0.825115	4611.08	1.24637	102
285	77	54	14	11.9754	0.333642	0.538398	1375.31	1.04343	91.1667
320	163	529	202	25.2138	0.712783	0.45371	1541.22	1.0073	83.1667
320	163	2273	557	53.9751	1.42239	0.853749	3648.07	1.00115	81
274	139	4031	957	48.7058	1.34513	2.46316	8723.51	0.961977	79.6667
561	285	5000	797	27.7739	0.680535	1.04095	4767.29	0.922354	76.3333
585	297	2752	202	16.1462	0.394442	0.968303	4931.04	0.911236	73.5
320	163	2032	479	84.1466	2.00962	1.68459	7628.16	1.02911	84.8333
220	112	2202	263	28.8413	0.749914	1.34279	5737.75	0.964072	78
230	62	2384	242	46.3477	1.43687	1.38975	3332.26	0.995989	83.8333
320	163	5000	5000	58.5615	1.63924	2.15707	6700.86	0.847282	70
220	112	2452	445	37.2057	0.941181	0.82306	3849.57	0.949805	77
561	285	5000	1939	69.3203	1.71102	3.21325	16463.6	0.985222	78.6667
220	112	190	49	34.9435	0.897082	0.849932	3684.39	1.12461	92.3333
220	112	5000	1144	50.5221	1.19942	1.2585	7294.51	0.909833	72.3333
561	285	5000	992	39.812	0.881712	0.841335	5431.97	0.951282	76
561	285	973	289	18.8854	0.557009	0.464998	1473	0.977419	79.3333
220	112	712	173	25.555	0.695748	0.562408	2084.73	0.98236	80.6667
220	112	17	15	11.8159	0.297782	1.71239	8433.82	1.11562	89.6667
561	285	5000	3071	46.8003	1.17656	0.875207	4284.42	0.904	72.6667
220	112	1976	306	33.263	0.924721	1.96189	7110.44	0.992763	80.3333
320	163	238	54	41.1964	1.06362	1.1573	5542.15	1.16102	92.1667
318	162	529	106	35.7485	1.00748	0.993659	3771.41	1.10119	89.3333
334	90	64	36	42.9557	1.32035	0.324378	665.338	1.14111	99.6667
320	163	1154	215	66.6776	1.69256	1.25539	5567.5	1.07291	87.8333
220	112	45	27	20.4563	0.561366	0.538606	2123.43	1.12473	90.6667
200	102	314	72	26.7802	0.778504	0.7889	1618.84	1.07038	89.3333
561	285	3164	389	20.9354	0.581418	0.874493	3076.26	0.957504	78.6667
561	285	4002	1970	26.756	0.803907	0.401469	1103.71	0.886491	73
585	158	770	334	27.5879	0.708194	0.306269	902.465	0.966612	85.3333
320	163	2746	3552	66.2624	1.54233	0.451113	2458.29	0.896911	73
561	285	5000	2106	35.8153	0.9965	0.701906	2413.49	0.910226	75
561	285	1958	336	33.1638	0.898682	1.01604	4002.3	1.04567	85
220	112	925	186	39.5778	1.06224	0.825522	3731.6	1.03102	81.1667
320	163	5000	812	25.4217	0.706311	1.09461	4164.89	0.872103	70
230	62	4430	501	39.1271	0.899656	0.719348	3200.57	0.884242	75.1667
220	112	180	43	34.0166	0.910987	1.15486	4583.8	1.14348	92.8333
561	285	5000	1743	36.8875	0.902277	1.44875	5742.99	0.910255	77.1667
561	285	373	95	33.0525	0.879794	1.19783	4863.99	1.15402	93.3333
320	163	2587	439	37.7796	1.12445	1.8976	5163.65	1.01303	84.3333
220	112	3808	499	39.7154	0.893539	1.33615	7026.57	0.935433	77.3333
220	112	48	19	14.9446	0.335114	0.989722	5932.13	1.07321	86.1667
561	285	2508	180	14.9113	0.386293	1.02635	4403.36	0.913504	74.5
320	163	232	64	19.5381	0.500627	0.734151	3596.82	1.05796	83.6667
320	163	5000	561	22.0672	0.587538	0.8107	3067.57	0.855913	70.6667
320	163	3492	1162	43.9205	1.24269	0.670762	2412.64	0.941297	76.3333
561	285	5000	3111	52.9892	1.18534	0.597655	3239.95	0.907763	74.6667
561	285	5	5	2.42974	0.0692524	0.330942	1022.53	0.872445	72.5
561	285	175	237	49.0451	1.35305	0.295109	1181.27	1.09539	88
220	112	26	17	16.7752	0.440372	0.764666	3193.78	1.14409	93
561	285	3766	834	72.3434	1.53258	0.997914	6144.29	1.01603	83
200	102	976	152	38.791	0.892582	1.49372	6730.42	1.03404	82
220	112	38	41	20.3877	0.606993	0.333811	1010.3	1.09229	89.3333
320	163	320	91	29.8493	0.730651	0.675964	3239.29	1.08098	88
320	163	5000	5000	84.483	2.43629	1.32404	3968.47	0.829382	69.3333
274	139	3166	3639	107.938	2.69543	1.07708	5105.07	0.910415	72.6667
561	285	3010	320	19.3638	0.492333	0.799064	3871.42	0.930117	74.3333
320	163	375	93	79.809	2.0729	0.777528	3386.92	1.11865	91
214	109	2763	1812	76.7572	1.81845	0.733273	3603.57	0.918731	75.6667
263	134	28	12	40.3335	1.03107	0.928942	4300.09	1.26137	101.667
200	102	2978	986	70.6807	1.77328	2.34153	8236.03	0.954981	77
220	112	468	27	9.68567	0.28346	1.07036	3250.77	0.899723	74.3333
561	285	2220	848	43.4807	0.965784	0.48931	3140.02	0.978614	78.3333
220	112	53	12	77.0066	1.6278	0.921951	6643	1.23604	97.6667
320	163	256	75	28.1393	0.72744	1.78048	8334.34	1.12943	90
200	102	429	155	35.8476	0.917714	2.6622	8229.24
200	102	4045	409	27.84	0.719209	1.55507	5204.92	0.90364	72.8333
561	285	2009	1421	24.046	0.602565	0.287896	1475.08	0.85372	68.1667
230	62	1285	110	36.5448	0.972469	1.74109	6564.65	1.03205	86
220	112	1337	1972	62.814	1.41662	0.382852	2423.75	0.904976	72
220	112	1646	311	42.1875	1.08002	0.88574	4069.07	0.994255	80.1667
220	112	4427	805	39.4202	1.1215	1.13931	3684.39	0.927601	76.5
220	112	306	73	35.2186	0.763977	0.778355	4861.77	1.07514	87
220	112	1016	237	40.4808	0.844517	0.626354	4734.76	0.985927	77.8333
263	134	11	10	27.5467	0.744801	0.666648	2727.69	1.26278	102
230	62	2843	236	28.1603	0.874701	0.884686	2220.2	0.941735	78.6667
585	158	43	20	25.9298	0.560932	0.59935	3718.42	1.18892	97
220	112	661	557	36.3271	1.15275	0.371164	897.49	0.965789	79.5
220	112	270	73	30.9734	0.817744	0.688455	3102.48	1.08073	86.6667
220	112	1181	234	55.9684	1.29661	0.949708	5058.69	1.02959	83.6667
230	62	697	38	17.0218	0.418239	0.992174	4940.05	0.954529	77.8333
220	112	4706	1288	53.7694	1.26662	0.916935	4996.73	0.907927	73.5
220	112	2905	437	37.8927	0.956213	1.08021	4819.79	0.954615	78
220	112	458	98	34.5801	0.762677	0.77121	4397.33	1.04879	86.1667
561	285	5000	714	24.7567	0.572738	0.625235	3452.24	0.886628	72.1667
220	112	2064	515	80.1003	1.83804	1.88125	9627.27	1.00083	82.5
220	112	339	98	28.7553	0.725855	0.581249	2781.27	1.04009	84
561	285	5000	1100	58.4904	1.27655	1.28451	6902.61	0.98826	82
220	112	156	68	44.0426	1.13374	0.493116	2197.55	1.10646	89.6667
220	112	2840	332	32.4775	0.754213	1.16628	6502.03	0.940316	75.8333
220	112	959	860	34.4255	0.909823	0.3347	1485.56	0.905931	72.8333
220	112	3127	242	23.8939	0.516633	2.11727	14637.4	0.882005	69.6667
585	158	661	136	25.9589	0.666537	0.465586	1710.12	1.02823	87.5
220	112	46	20	39.0416	0.922079	0.666753	3923.81	1.19484	94.6667
220	112	5000	4775	90.9172	2.07601	1.19307	6448.84	0.869207	71
230	117	142	205	70.4847	1.37562	0.299364	1257.14	0	0
274	139	5000	5000	67.0874	1.38354	1.60833	10294.8	0.730518	59
220	112	546	90	26.8762	0.618079	1.10939	6005.68	1.0327	84.3333
220	112	874	227	50.645	1.29893	0.716132	2749	1.03044	86.3333
274	139	865	203	39.3314	1.07533	1.85694	6849.27	0	0
320	163	181	78	23.1734	0.618699	0.499474	2023.7	1.0699	87.3333
230	117	299	180	81.7148	2.06017	0.463032	2095.08	0	0
220	112	2761	254	20.048	0.549512	0.822909	2780.29	0.881361	73.5
320	163	1000	167	31.7817	0.820117	1.19855	5590.41	1.05179	84.6667
220	112	969	160	45.6375	0.960351	1.64784	11004.6	1.04762	83.8333
220	112	27	34	23.087	0.606079	0.324647	1271.45	1.10906	91.8333
220	112	1870	692	91.4076	1.9758	0.941251	6005.68	0.979748	79
320	163	38	22	14.3945	0.331894	0.680327	3518.8	1.08565	89.3333
561	285	5000	1106	33.1143	0.831008	1.21124	5929.42	0.934262	75.1667
320	163	588	127	41.1464	1.01598	0.83736	3596.82	1.08556	90
561	285	5000	2452	72.3057	1.75098	0.95682	4415.43	0.954626	78.8333
320	163	5000	724	38.1197	0.863571	1.61013	9592.19	0.933181	75
320	163	1808	497	49.207	1.24499	0.69079	3022.33	0.999675	80.1667
320	163	69	26	33.7131	0.960215	0.760298	2440.1	1.20496	99.5
561	285	5000	3933	55.0057	1.18419	1.01535	6627.86	0.88596	71.1667
220	112	4032	296	19.8729	0.468976	0.670381	3684.39	0.789597	63.3333
585	158	2925	282	36.8875	0.818278	0.774198	3962.86	0.996222	83.3333
561	285	3931	628	41.5482	1.07279	1.18633	5246.79	1.01468	82.3333
320	163	3180	385	24.0101	0.634662	0.813761	3297.09	0.920853	75.1667
200	102	1821	330	38.3663	1.00902	2.32649	7846.28	0.993814	80
334	90	4048	275	38.4629	0.851626	1.31957	7123.44	0.960868	79.6667
220	112	4256	1238	63.2625	1.65861	1.50976	6855.52	0.936432	75
230	62	5000	1905	52.116	1.29219	2.03144	8176.1	0.838419	70.8333
561	285	2989	475	41.983	1.05377	1.30573	6200.63	1.03672	83.8333
220	112	1000	150	33.7761	0.797578	1.32528	7565.75	1.02672	81.8333
220	112	2725	342	32.0678	0.830592	1.36487	5680.43	0.957687	78.5
220	112	12	8	9.56327	0.235176	0.982073	4866.21	1.07672	87.1667
320	163	1042	259	80.0309	1.94056	0.917542	4533.87	1.05947	86.5
561	285	5000	5000	47.2163	1.30176	0.367862	1244.75	0.853597	71.1667
230	62	171	23	49.0281	1.33591	0.74403	2141.53	1.14757	99.1667
561	285	3770	875	35.4826	0.996234	0.687551	2362.81	0.977877	79.8333
220	112	2852	450	40.9399	1.10764	1.4409	5945.68	0.973764	77.8333
220	112	4597	616	33.7509	0.887601	1.83689	7442.47	0.920853	75.1667
52	27	47	14	49.4982	1.05445	2.21032	16924.4	1.15488	90.3333
230	117	839	169	51.6747	1.34671	1.18928	5537.09	0	0
561	285	752	159	51.7016	1.36271	0.87154	3876.91	1.12148	89.3333
230	117	573	152	117.293	2.7097	2.7022	14255.3	0	0
220	112	2946	449	48.3857	1.05612	1.36796	8213.51	0.967826	78.8333
320	163	5000	5000	73.6607	1.95212	1.31324	5402.3	0.876108	71.3333
220	112	300	196	110.9	2.54978	0.547653	3215.09	1.05476	84.3333
561	285	494	154	42.9706	1.18454	0.615245	2310.44	1.11665	90.6667
220	112	417	113	53.0282	1.36979	0.682872	3043.18	1.07972	87.5
220	112	876	211	65.8726	1.75597	0.912858	3678.76	1.04759	84.8333
561	285	15	40	19.5235	0.53754	0.287218	1017.21	1.16427	96.3333
561	285	5000	2649	36.3678	1.00224	1.90125	6531.86	0.895844	74.5
561	285	2099	379	53.8815	1.35822	1.10717	4947.61	1.06503	87
585	158	98	21	10.3265	0.305898	0.815167	2312.07	1.06	88.5
561	285	1411	207	17.658	0.485016	0.776017	3059.41	0.978809	78.8333
230	62	426	49	58.0556	1.53416	0.857992	3385.89	1.10039	91
220	112	4133	829	44.8602	1.17584	1.05721	4333.63	0.930927	76.5
585	158	19	10	10.4825	0.240233	0.618105	3035.64	1.08229	90.5
585	297	2500	817	51.4868	1.31659	0.620661	2787.04	1.01108	81.8333
220	112	1945	267	21.4417	0.548744	0.587687	2434.04	0.878373	72.6667
561	285	1145	243	29.0901	0.707354	0.747829	3347.69	1.04016	86.3333
220	112	864	148	51.5583	1.28154	1.56434	7727.83	1.07	86.6667
220	112	330	75	25.7658	0.733501	1.73417	5523.52	1.09257	90.3333
275	74	27	5	55.823	1.34006	1.23041	5716.07	1.29508	107.667
220	112	506	96	37.3309	1.0032	0.99634	4036.84	1.08011	88.1667
220	112	5000	809	29.2207	0.790134	0.976373	3816.93	0.864147	70.3333
220	112	710	75	19.8766	0.425137	0.879596	5293.73	0.947139	77.6667
220	112	1163	1121	151.19	3.5556	1.78773	10352.6	0.962927	77.1667
200	102	660	140	41.8086	1.17444	1.13416	2602.72	0	0
220	112	1084	140	21.5059	0.629	1.08853	3422.09	0.988487	80.3333
230	62	5000	810	59.0513	1.48789	1.21861	5250.38	0.915152	75.8333
220	112	5000	1083	43.4656	1.01907	1.00663	5361.89	0.890128	72.3333
671	341	80	39	46.5573	1.0584	0.594958	3401.53	1.22658	100
220	112	165	47	25.0729	0.628782	1.45539	7288.85	1.11457	89.3333
561	285	673	341	93.0075	2.00521	0.517628	3252.93	1.07623	87
220	112	1758	960	120.7	2.70842	1.35254	8306.32	0.969184	77.5
220	112	3454	579	30.4459	0.773625	0.721217	3441.56	0.892401	71.5
230	62	924	86	16.1605	0.419767	0.398003	1342.66	0.844952	72.3333
220	112	5000	525	21.053	0.547347	0.94805	3975.76	0.781779	64
220	112	250	52	36.2594	1.1054	1.01921	3096.51	1.13214	90.6667
220	112	615	98	22.5503	0.563346	0.82464	3827.77	0.99788	81
561	285	1188	378	41.0039	1.04002	0.56707	2421.13	1.04482	86
585	158	1292	159	36.8325	0.929086	0.725757	3117.44	1.05742	87.6667
220	112	2284	469	51.5583	1.35951	2.16396	9773.45	0.996366	79.1667
561	285	2914	1274	122.557	2.60434	2.73098	17202.7	1.01376	82.5
220	112	548	154	58.6021	1.30553	2.98823	17746	1.09036	88.3333
263	134	26	12	35.7352	0.94771	1.15753	5188.38	1.26954	101
220	112	5000	1300	51.4511	1.33483	1.23305	5131.8	0.912955	74.8333
220	112	1561	313	36.395	0.987052	0.775263	3007.79	0.983717	80.1667
220	112	4948	1026	58.4193	1.26993	1.3126	7881.16	0.924857	75.3333
561	285	493	102	64.5376	1.61006	0.87797	4143.88	1.15176	94
220	112	1042	222	32.5747	0.899422	0.700983	2660.56	0.999362	81
561	285	741	197	27.3112	0.724889	0.660597	2636.15	1.06109	86.8333
220	112	192	49	22.2575	0.588362	0.862854	3603.89	1.07944	87.6667
585	297	2058	501	47.4298	1.18083	0.717856	3461.14	1.03728	83.6667
230	62	1280	185	43.8063	1.13158	0.654603	2610.11	0.992942	82.6667
220	112	5	5	3.8265	0.0949784	0.374918	1810.35	0.942953	76.6667
561	285	375	332	44.2494	1.08086	0.34028	1523.28	1.06024	88
220	112	3317	368	29.7937	0.752528	1.43198	6021.68	0.933113	77
561	285	5000	1372	58.0858	1.67847	1.1444	3456.23	0.989017	82.5
220	112	3187	1819	83.8405	1.87496	0.851509	4831.45	0.920812	75.1667
230	62	190	35	67.2353	1.50121	0.565358	3098.71	1.11848	92.5
561	285	992	530	52.973	1.22302	0.443089	2480.21	1.03437	84
220	112	514	98	40.4316	1.0697	0.981651	4162.85	1.08218	87.6667
220	112	13	13	18.3982	0.433042	0.723961	4325.72	1.17783	93.1667
585	158	687	38	10.4827	0.300341	1.00113	2957.03	0.950569	80.3333
220	112	2010	368	56.7902	1.28117	1.14158	7282.19	0.998413	79.3333
220	112	1682	220	32.272	0.778262	1.3064	6756.48	0.987332	80
220	112	3074	392	34.31	0.778395	0.9949	6346.53	0.929196	73.8333
220	112	5000	1051	32.3203	0.923956	0.963311	3115.23	0.875058	72.1667
561	285	5000	4276	104.438	2.50252	2.35104	12251.9	0.941214	76.1667
220	112	241	55	27.857	0.799848	1.3455	3841.36	1.11835	94.1667
320	163	269	66	16.3756	0.407871	0.55688	2240.72	0.994265	83.3333
220	112	3500	4391	84.924	2.0683	0.756738	3545.59	0.878136	72.3333
220	112	225	48	41.1322	1.04843	1.38359	6806.06	1.14573	91.3333
220	112	249	99	28.003	0.731494	0.473324	2074.38	1.0398	84.5
220	112	241	109	22.9495	0.646582	0.413357	1420.52	1.01258	82.6667
220	112	912	248	91.6935	2.48118	1.37358	4864.67	1.04341	86.3333
561	285	233	75	17	0.436011	0.999992	3838.64	1.08415	90.8333
220	112	453	97	32.0439	0.768029	0.769787	4005.47	1.0501	85
585	158	174	34	15.4346	0.379372	0.695999	3261.01	1.06024	87.3333
220	112	1246	825	80.3649	2.11042	0.655739	2591.67	0.973666	80.5
561	285	413	78	134.596	2.91667	1.09076	7598.29	1.15144	90.8333
220	112	622	169	40.9541	0.982162	0.618512	3272.59	1.03032	83.1667
561	285	578	432	22.3658	0.575257	0.294721	1293.6	0.953906	77.5
585	158	5000	1178	53.9938	1.3871	0.77355	3136.28	0.947739	79.3333
585	297	5000	5000	69.0083	1.70082	0.619314	3059.41	0.856003	69.3333
220	112	1418	318	61.2427	1.30321	0.847296	6245.85	1.00784	79.3333
220	112	199	72	15.917	0.426254	0.375343	1409.49	0.953619	78.8333
220	112	53	38	31.4864	0.825838	0.410556	1714.77	1.13075	91.8333
220	112	335	71	37.6951	0.881104	1.56076	8126.14	1.10946	90.5
220	112	4512	250	21.483	0.477878	0.967445	6459.27	0.82004	64.6667
220	112	1083	284	38.9107	0.949288	0.611259	3409.98	0.986915	78.3333
561	285	1155	243	29.583	0.68557	0.73905	4247.38	1.03534	83
220	112	3157	380	24.6368	0.705118	2.16956	6806.06	0.926936	76.8333
561	285	2609	709	48.8243	1.22713	0.679304	3201.44	1.01276	82
220	112	89	29	19.7213	0.421859	0.862634	6043.73	1.07358	85.8333
220	112	329	112	34.5671	0.93293	0.540968	2198.56	1.05658	84.6667
610	164	2151	5000	99.5194	2.14679	0.33146	1935.13	0.885731	73
220	112	2640	542	47.7435	1.39669	1.17837	3789.96	0.977839	79.1667
585	158	1205	173	45.1491	1.3679	0.68154	1667.41	1.07391	91
561	285	4727	711	28.7983	0.734506	0.789736	3768.52	0.948566	76
334	90	3202	1031	107.92	2.71722	1.63578	7650.54	0.954263	78
274	139	357	161	26.0463	0.639071	0.399652	1620.78	0.995526	84
220	112	602	172	25.1445	0.637519	0.481656	1994.88	0.967016	80
320	163	3221	4537	54.9389	1.49728	0.449169	1717.81	0.879153	71.1667
220	112	1753	345	46.1231	1.27257	0.98503	3596.23	1.00125	82.5
320	163	1028	173	26.0755	0.788198	1.02476	2948.66	1.04009	85
220	112	3317	1001	72.2179	1.78903	1.36023	6719.54	0.953916	77.3333
220	112	1093	757	74.3284	1.71401	0.525766	2903.02	0.971754	79.1667
220	112	5000	773	36.2323	0.858782	1.2734	6585.81	0.887801	72
334	90	5000	3059	56.5935	1.5374	2.16127	6950.61	0.855838	72.6667
320	163	3768	547	32.4169	0.889419	1.02769	3960.29	0.956543	77.3333
320	163	291	62	15.7711	0.435553	1.23215	4818.22	1.04505	83.5
220	112	2142	3742	77.8174	1.87889	0.51096	2662.03	0.886462	71.1667
220	112	883	241	67.212	1.67319	0.79526	3982.82	1.03763	83.1667
220	112	1264	226	46.4121	1.24985	1.08408	3949.07	1.03104	85.6667
320	163	4453	612	32.9785	0.889792	1.80181	6781.22	0.956363	78.3333
220	112	524	96	19.2197	0.555447	1.94181	5999.71	1.02688	85.3333
220	112	1109	184	43.8519	1.06146	1.68323	8903.67	1.04481	83.6667
220	112	34	10	62.4663	1.46034	0.724168	4290.29	1.24425	99.3333
561	285	2006	490	59.9599	1.56485	0.817434	3340.58	1.05006	86.3333
561	285	1088	479	31.8768	0.825199	0.432168	1940.62	1.00374	81.1667
220	112	96	16	8.34737	0.251506	0.446681	1188.09	0.914274	76.3333
320	163	2475	438	64.0801	1.36457	1.41791	9614.01	1.01988	81.3333
320	163	5000	1374	34.8133	0.764004	1.26218	7464.1	0.839595	68.5
334	90	1349	156	54.9389	1.45308	0.885679	2558.8	1.04728	92
561	285	5000	3771	35.3239	0.98555	0.743019	2907.14	0.861832	69.5
671	341	24	21	32.5139	0.867874	0.548764	2274.68	1.27074	103.333
220	112	754	121	24.046	0.635364	1.73784	7613.93	1.02264	81.6667
561	285	791	144	60.367	1.60706	1.08971	4218.38	1.13273	93.1667
220	112	2096	276	30.8234	0.808124	1.13247	5142.36	0.969728	77.6667
220	112	1396	290	28.6482	0.806411	0.650538	2269.84	0.961937	78.3333
220	112	481	399	26.9969	0.752357	0.307596	1057.66	0.934499	77
220	112	5000	3556	55.823	1.43837	1.03764	4969.13	0.852393	67.6667
220	112	3924	585	28.5947	0.857454	0.924087	2696.65	0.911478	75
220	112	5000	3109	49.4553	1.37546	1.5664	5507.14	0.854545	69.5
561	285	5000	1614	45.0474	1.18815	0.800388	3169.82	0.95194	78
220	112	4068	422	26.9969	0.729924	1.46542	4996.45	0.912725	76
220	112	317	129	25.3554	0.665582	0.430042	1646.27	1.00259	83.3333
220	112	4559	490	24.1991	0.662775	0.886449	3261.01	0.867599	71.3333
230	62	654	69	32.0558	0.876792	1.99907	6086.69	1.06882	91.5
220	112	5000	787	23.1302	0.658996	0.878705	2907.14	0.813473	66.8333
220	112	906	263	75.2889	1.86902	0.832769	4266.83	1.03532	82.6667
561	285	257	23	7.71187	0.21569	0.70719	2643.64	0.912739	74.1667
220	112	5000	1040	47.1262	1.14465	1.58601	8015.52	0.912965	73.6667
263	134	30	6	113.469	2.60786	0.762279	4606.19	1.26092	100.333
561	285	54	58	20.2701	0.4943	0.390654	1989.39	1.1168	90
220	112	690	119	49.8343	1.31299	1.45866	6148.18	1.08519	88
220	112	189	50	15.5163	0.433803	0.555649	1910.59	1.00327	82.6667
230	62	5000	424	40.1311	1.06971	1.54231	5949.22	0.927566	77
220	112	3300	891	34.5156	0.868323	0.590612	2236.29	0.881881	74.6667
230	62	185	29	28.0135	0.759187	0.736832	2643.64	1.10447	92
220	112	5000	1824	47.7187	1.22378	0.897802	3833.2	0.878784	72.3333
561	285	968	274	26.6663	0.669299	2.58611	11210.6	1.06574	87.5
220	112	3551	474	37.1086	0.90904	1.34002	6721.08	0.942754	76.1667
220	112	1356	199	33.3127	0.890865	1.4257	5776.45	1.01682	83
561	285	2376	2722	67.1071	1.68341	0.427585	2077.32	0.953769	76.8333
585	297	499	5000	233.676	5.54684	0.52929	2653.03	0.854761	70.1667
230	62	131	21	31.3223	0.871801	0.767223	2843.94	1.14067	93.6667
561	285	1414	308	36.2458	1.01981	0.777694	2613.82	1.05992	87.6667
220	112	937	50	12.7091	0.324575	1.58252	6358.15	0.887965	73.8333
561	285	5000	1752	28.435	0.666563	0.906849	4685.79	0.832574	68
561	285	5000	4023	31.1357	0.799408	1.16324	4981.63	0.80022	65.8333
561	285	5000	1617	52.4789	1.11806	0.829634	5977.82	0.944961	74.6667
220	112	3194	920	31.5571	0.835609	0.552049	2376.9	0.872477	70.5
220	112	2336	337	32.1517	0.856185	1.97992	7900.98	0.973513	79.6667
561	285	462	89	50.0944	1.3356	1.31476	5804.23	1.17021	93.3333
561	285	5000	2594	48.8582	1.29032	1.07708	4298.14	0.92667	75.8333
220	112	3409	353	27.2806	0.704883	1.23955	5714.76	0.920031	73.5
561	285	5000	801	30.118	0.788238	1.90575	8331.03	0.965674	77.8333
220	112	4215	719	31.5571	0.812913	0.760558	2919.53	0.883233	74
220	112	299	52	17.2437	0.448227	0.958537	3811.52	1.01703	84
220	112	1061	240	45.7009	1.14013	2.62897	14141.2	1.04374	82.6667
220	112	2212	193	18.5638	0.499068	0.774441	3147.42	0.879786	70.5
220	112	741	127	45.8279	1.3545	1.45012	4931.81	1.08092	85.8333
561	285	522	149	25.9008	0.8017	0.692914	1906.53	1.09645	88.3333
220	112	606	107	41.0609	1.13582	1.17086	4022.55	1.08223	90
220	112	5	5	3.33153	0.107022	0.608852	1351.74	0.960472	79.3333
220	112	448	79	47.3722	1.40887	1.28178	4133.47	1.11299	89.1667
220	112	147	33	44.2571	1.1248	1.12398	5163.55	1.16996	94.3333
230	62	1856	122	25.6027	0.732635	1.19395	3663.14	0.974469	81.8333
220	112	386	76	23.4958	0.583257	1.57612	7786.3	1.05394	84.6667
561	285	5000	1331	45.7167	1.0664	1.03153	5664.08	0.954429	77.1667
220	112	5000	2336	44.8368	1.12454	1.44624	6561.78	0.844777	68.8333
220	112	2506	962	48.3857	1.33365	0.664019	2300.63	0.935683	77
220	112	935	164	40.5792	0.876201	0.886988	5923.45	1.02263	81.8333
220	112	5000	1122	51.8544	1.29613	1.92715	9362.59	0.924804	74.5
220	112	1191	141	21.5863	0.57587	1.52694	5956.02	0.977937	80.3333
220	112	135	47	21.0609	0.566809	0.602499	2302.26	1.07099	87.5
200	54	82	19	32.4775	1.01389	0.526465	806.317	1.14137	98
220	112	5000	264	21.195	0.548649	0.749296	3468.51	0.873404	70.3333
220	112	987	123	22.6769	0.559761	0.952129	5425.97	0.973101	76.3333
561	285	122	152	44.9537	1.07486	0.230131	1190.2	1.11075	90
585	158	3353	2007	51.0459	1.22675	0.374753	1767.64	0.91046	75.5
220	112	3544	336	25.1949	0.663228	1.31318	5784.38	0.910996	73.3333
220	112	277	63	39.9504	1.02895	0.857084	4042.56	1.11201	88.5
230	117	251	89	23.6719	0.653636	0.75059	2805.88	0	0
585	158	5000	4978	63.9135	1.54564	0.527116	2201.68	0.874471	74
200	102	190	35	72.6579	1.66452	1.79819	7389.45	1.17054	95
561	285	4241	917	59.8871	1.41625	0.971294	4943.09	1.00552	82.3333
561	285	58	39	24.0371	0.557426	0.819401	4603.03	1.18982	95.8333
561	285	1594	415	85.7532	1.83031	0.818613	5002.16	1.06365	87
220	112	92	40	27.1586	0.71295	0.562387	2358.44	1.11566	91.3333
220	112	2888	222	19.4217	0.544575	1.43716	4309.94	0.901574	76
220	112	5000	907	41.0324	0.942567	1.87405	9517.85	0.896574	74
220	112	924	471	36.8187	0.864698	0.403498	2037.93	0.939192	77
585	158	1029	35	9.83333	0.278391	0.793205	2727.42	0.894044	73.6667
230	62	351	44	41.6348	1.12702	0.761754	2375.22	1.09678	94.3333
220	112	5000	5000	86.0812	1.91032	1.22465	5226.44	0.783454	62.5
220	112	2370	388	31.5335	0.905719	0.883243	2723.55	0.955439	78.6667
220	112	97	27	49.0621	1.07941	1.65157	10826.4	1.20048	95.6667
67	19	96	28	44.142	0.958592	0.413509	1893.06	1.02921	88.3333
585	158	2499	551	58.4193	1.51595	0.588232	2254.6	1.00432	84.1667
220	112	34	94	23.0096	0.591034	0.204677	905.227	1.0229	83
230	117	793	164	53.9283	1.15937	1.37137	9881.21	0	0
220	112	912	105	19.1409	0.515534	1.15303	4611.45	0.974324	79
220	112	652	116	36.3136	0.928534	1.04008	5178.9	1.06007	84.3333
220	112	3097	592	45.2197	1.21693	1.09414	4309.94	0.959557	78
220	112	204	62	55.8036	1.49853	0.620206	2424.57	1.12011	91.1667
585	158	519	87	34.8003	0.840455	2.25637	10324.3	1.13582	94.6667
561	285	2045	697	45.0161	0.944615	0.516217	3616.69	0.990197	79.1667
220	112	4204	481	28.4457	0.773971	1.76006	7430.07	0.916771	73
220	112	65	20	38.8961	0.997087	1.096	5391.37	1.20846	96.3333
230	62	2501	285	38.3625	1.08775	0.801686	2756.58	0.956749	78.8333
220	112	3842	346	25.2509	0.618983	1.8711	5742.24	0.896229	73
230	62	998	78	25.073	0.691432	0.971962	2840.42	1.00353	86.5
220	112	3484	459	38.1906	0.891706	1.28622	4641.04	0.941786	75.3333
220	112	1797	152	26.8101	0.589365	2.08804	8451.79	0.957322	77.6667
220	112	5000	217	47.1384	1.20847	1.228	5661.49	1.05772	84.5
220	112	3457	276	27.9213	0.582474	1.32264	5936.99	0.895246	72.5
220	112	901	101	17.9877	0.500773	1.08475	3776.55	0.968389	78.5
220	112	2963	170	37.8164	0.776529	1.04142	5160.01	0.991703	79
561	285	5000	1233	54.2595	1.3552	2.60551	13517	1.00828	79.6667
274	139	2743	312	26.6595	0.66939	1.77132	5342.33	0.953274	77.1667
561	285	4441	651	34.0842	0.73913	0.833022	3475.89	0.958054	77.3333
230	62	2200	236	27.3655	0.786316	0.632079	1838.81	0.923733	78.3333
220	112	5000	210	22.7489	0.568078	2.00029	6263	0.982871	78.3333
220	112	203	30	39.2579	0.983074	1.5774	4754.8	1.20109	96.3333
320	163	5000	755	49.0317	1.21166	0.99682	2784.08	0.966866	80
220	112	1874	106	19.0102	0.488652	0.576272	1705.68	0.926054	74.5
220	112	59	77	62.367	1.37028	3.00371	12625.6	1.08781	87
220	112	5000	1025	63.6186	1.31538	1.52309	7101.48	0.948442	76.6667
320	163	5000	1135	53.4498	1.20038	2.47673	10602.5	0.93574	74
276	140	1327	137	29.7408	0.745418	0.981557	2702.39	1.02204	84
320	163	62	40	27.3215	0.655835	1.68171	5653.73	1.18834	95.3333
320	163	413	88	33.0982	0.861964	1.07727	2919.53	1.10853	90.5
561	285	5000	1215	35.8844	0.789108	0.95251	4319.79	0.913839	72.1667
561	285	2113	817	30.639	0.762638	0.431318	1083.08	0.947896	79.8333
220	112	6	9	11.6346	0.292883	0.470743	1266.83	1.11917	92.3333
399	108	37	9	50.384	1.3588	2.61424	5936.99	1.30084	108.333
561	285	3152	966	46.4848	1.09373	0.597466	2052.43	0.981383	79.8333
220	112	2622	1301	87.9764	2.20899	2.55882	7262.26	0.953855	78
220	112	3306	660	60.7583	1.3102	1.97931	8513.81	0.966202	77.6667
561	285	5000	5000	55.5568	1.49881	1.9984	4662.3	0.893257	73.3333
220	112	4703	1185	46.2193	1.06968	3.0729	11563.9	0.906963	72.6667
561	285	2773	415	30.4426	0.796713	1.08532	2794.96	1.0145	82
561	285	5000	1030	38.5339	0.994406	1.22094	3395.5	0.967745	78.6667
220	112	5000	1557	46.1036	1.03315	0.874114	3586.04	0.864256	68.8333
287	78	845	75	30.9362	0.690125	0.992721	3199.17	1.03041	86.8333
220	112	89	32	21.6816	0.495445	1.2553	4796.26	1.11364	89
220	112	1855	256	23.521	0.651622	0.749512	1639.28	0.930585	75.6667
561	285	1384	244	52.0524	1.13861	1.22591	4705.1	1.09141	89.3333
320	163	166	31	69.9621	1.66268	1.1147	3901.76	1.19823	96.3333
561	285	4214	622	32.9124	0.801321	1.94972	5433.41	0.993901	83
334	90	315	49	23.5541	0.58221	0.619999	1297.74	1.05075	92.8333
585	158	5000	1119	34.387	0.959176	0.497391	1559.9	0.911942	77
561	285	5000	771	27.3877	0.643196	0.917955	4889.55	0.910638	74
220	112	2527	215	20.7936	0.564498	1.43435	6194.7	0.91816	72.8333
349	94	1238	136	54.3567	1.58421	1.0349	3055.07	0	0
320	163	193	48	48.1101	1.21811	0.823175	4174.28	1.16416	92.3333
220	112	880	35	42.5357	1.11796	0.921573	3937.89	1.17831	95.3333
220	112	326	67	30.0957	0.92245	1.4419	4347.51	1.11408	89.3333
610	164	722	95	33.4864	0.891735	0.770975	2673.8	1.09865	92.8333
263	134	8	10	24.5402	0.73316	1.02345	3082.27	1.24846	101.167
220	112	5000	775	68.0721	1.61755	1.59906	9059.6	0.975302	77.8333
220	112	3211	33	57.8606	1.61715	0.353006	1270.42	1.17601	96.1667
561	285	1229	479	51.2664	1.16842	0.516113	2764.41	1.03698	84.8333
561	285	5000	5000	45.0835	1.1266	1.17326	5055	0.828665	68.6667
561	285	967	125	15.583	0.393493	0.971877	4409.53	0.979778	79.8333
220	112	5000	192	39.6889	0.963107	0.724438	3890.7	1.0484	83.6667
220	112	500	114	47.0372	1.04401	2.28677	14876.9	1.09453	87.3333
561	285	3004	488	48.1532	1.09557	1.23048	7014.41	1.03658	84
561	285	5000	1063	35.3687	0.811687	1.30554	6824.74	0.934552	76.8333
220	112	1544	202	32.8595	0.755585	1.39428	7189.63	0.991972	81.6667
220	112	4609	1556	44.818	1.24263	0.776979	2733.22	0.893387	73.3333
200	102	1274	216	39.2368	1.13596	1.80786	4002.63	1.03144	85
230	62	1861	162	40.5652	1.12681	1.78542	6719.54	1.01334	83
320	163	5000	2384	66.1383	1.70755	1.225	5475.77	0.919772	74.5
320	163	5000	621	47.3074	1.22204	1.26046	5391.37	1.007	82.1667
320	163	815	143	49.2251	1.20586	1.28692	6454.73	1.09335	88.3333
220	112	4082	5000	69.4132	1.9673	0.714297	2417.7	0.853223	69.8333
320	163	906	292	41.5053	1.13445	0.576269	2265.02	1.03002	83
561	285	5000	4563	59.4565	1.47703	1.15751	5538.68	0.910083	73.5
220	112	5000	375	35.6256	0.901253	0.642602	2806.88	0.967496	79.3333
320	163	2737	1278	78.2015	2.04191	0.853445	4025.4	0.967511	77
220	112	3378	810	44.1729	1.01624	0.728386	3784.59	0.914176	75.1667
561	285	5000	5000	59.3396	1.52953	1.26094	5576.77	0.831875	67.5
175	20	660	26	63.063	1.65531	1.53043	3757.85	1.07503	97.8333
220	112	1858	545	60.4004	1.64433	0.88434	3513.06	0.986265	79.3333
561	285	643	27	6.25055	0.174939	0.802005	2860.11	0.950372	77.8333
220	112	2482	571	45.1805	0.959896	0.688639	4437.82	0.933327	75.6667
220	112	416	83	33.1648	0.853702	0.967403	4056.92	1.07902	88.3333
220	112	163	47	32.7145	0.822012	1.7532	9026.55	1.14707	90.6667
220	112	5000	1586	47.0297	1.31228	1.20518	4337.3	0.896787	73.3333
561	285	142	66	18.5124	0.514239	0.69323	2383.65	1.11857	92.1667
220	112	2773	848	48.3865	1.15228	0.677754	3586.04	0.928313	75
561	285	5000	1047	43.0104	1.10635	1.42638	7027.25	0.980812	78.1667
587	298	215	521	42.4672	1.1777	0.245996	919.591	0	0
230	62	1561	164	44.2124	1.17601	0.891552	3045.34	1.00536	85.1667
561	285	5000	1777	42.119	1.01527	0.5533	2839.91	0.928561	75.3333
220	112	833	142	26.6595	0.743866	0.854377	3096.51	1.01336	82
561	285	2027	522	49.4017	1.08486	0.662305	4341.56	1.0248	81.6667
220	112	226	107	33.8111	0.881477	0.444337	1849.27	1.05529	86.5
220	112	5000	5000	94.2698	2.39289	1.22619	6040.97	0.834422	66.5
561	285	5000	1650	29.9568	0.7124	0.506162	2698.56	0.868303	70
561	285	574	343	50.8552	1.31	0.419917	1712.95	1.06705	88.5
220	112	2628	589	66.8764	1.53082	1.2232	7004.81	0.978559	79.1667
220	112	5000	478	24.6292	0.699076	1.5537	5101.41	0.889433	73.1667
220	112	2642	583	47.2905	1.27594	0.941418	3543.08	0.964503	79
220	112	5000	1259	50.0245	1.14018	1.32337	7464.1	0.895942	72.6667
220	112	2909	524	44.4425	1.13314	1.0524	4983.91	0.961047	77.1667
220	112	743	188	32.8727	0.786819	0.583832	2617.53	0.995345	82.6667
220	112	989	159	26.3611	0.756176	0.899306	2880.47	1.00632	82.3333
220	112	4174	464	25.5471	0.721728	2.00535	6688.91	0.907639	75.1667
220	112	5000	488	26.2131	0.697606	1.36836	5337.45	0.884607	72.6667
561	285	1967	448	64.248	1.53744	0.858494	4827.03	1.05541	84.3333
220	112	128	34	46.7016	1.25077	0.737448	3333.48	1.16016	91.3333
220	112	5	8	12.2139	0.351958	0.94047	3240.26	1.22483	99
220	112	3731	1058	58.3077	1.60204	1.19046	4552.84	0.942979	76.3333
220	112	6	9	9.37348	0.270113	0.422093	1154.86	1.08883	92.3333
220	112	2177	267	24.888	0.697819	0.952908	3357.2	0.943198	77.3333
220	112	5	5	2.80494	0.0790355	1.41384	5202.62	0.869322	70.1667
220	112	2323	297	28.3512	0.769076	1.03857	4276.59	0.953097	75.5
220	112	639	218	35.9277	0.938633	3.48175	16673.7	1.05184	83.5
220	112	3656	841	51.8478	1.39064	1.14051	4666.56	0.947082	76.5
561	285	2601	618	61.3265	1.50627	0.849591	4071.33	1.03389	84.1667
220	112	1725	267	26.2131	0.824198	0.882209	1992.21	0.972859	81
561	285	19	27	17.2475	0.433141	0.515435	2058.26	1.17969	99
220	112	4002	1280	70.667	1.74565	1.96589	9579.57	0.940281	76.3333
220	112	56	8	7.74023	0.207658	0.970572	3352.44	0.956332	80.1667
220	112	1385	744	78.7493	2.03527	0.7125	3309.93	0.977597	78
561	285	3090	462	29.9568	0.821612	1.06305	4065.56	1.00886	81.6667
220	112	741	177	61.7229	1.6546	0.856694	3120.75	1.05712	87.8333
49	25	1245	245	39.5689	1.0648	1.00673	4246.3	0.893825	71.8333
320	163	3238	660	54.7767	1.22147	0.942922	3752.52	0.978566	78.3333
220	112	2023	244	24.9281	0.592001	2.34639	8089.09	0.936725	75.5
220	112	1006	195	36.071	0.850065	0.748407	2929.9	1.00299	79.8333
561	285	4301	713	49.7745	1.18376	1.25397	4290.29	1.01402	81.8333
219	112	5000	1109	49.331	1.19123	0.856725	2537.12	0.917329	75.8333
220	112	574	75	17.327	0.467291	1.25416	4684.37	0.991733	81.3333
320	163	1315	304	42.1416	0.904414	2.70573	9912.85	1.03847	86.3333
220	112	156	44	33.4864	0.819169	0.814337	2453.97	1.12607	92
320	163	5000	1553	31.8193	0.793737	1.3783	3849.54	0.837951	69.3333
220	112	1670	412	45.7747	1.26057	4.1218	8936.27	1.01288	83.3333
557	283	5000	2288	50.186	1.30588	0.892466	2328.53	0.923018	75.8333
230	117	5	5	4.65342	0.107762	2.2849	8052.22	0	0
220	112	5000	781	36	0.915278	1.34462	3591.13	0.899853	74.3333
320	163	1276	235	34.2904	0.853665	0.82573	2489.02	1.02031	81.8333
274	139	6	6	8.65753	0.188326	1.31121	5768.54	1.08141	85.8333
557	283	512	437	57.2323	1.4145	1.15275	3580.96	1.00261	81.5
561	285	5000	3389	33.4864	0.696606	0.850516	3647.59	0.814941	66.5
561	285	400	184	17.8867	0.461881	0.365842	961.796	0.979029	80.3333
320	163	5000	543	25.8052	0.534538	1.02552	4730.97	0.855921	69
220	112	3871	722	51.5517	1.22709	1.27838	4765.68	0.946898	74.6667
230	62	5000	769	20.5237	0.544524	1.56621	3228.8	0.721046	61.6667
220	112	5000	956	49.8101	1.22161	1.56288	4628.34	0.92741	76.6667
561	285	7	23	11.868	0.31009	1.77048	4645.29	1.22182	99.3333
220	112	1047	177	49.2604	1.29062	1.37598	3456.23	1.05427	87.1667
220	112	526	100	27.7869	0.596488	0.718796	2973.86	1.00653	82
220	112	1961	95	61.5134	1.36567	1.55322	6005.19	1.10564	89.6667
320	163	388	81	42.3989	0.999576	1.38248	4943.09	1.13176	90.6667
320	163	561	438	121.095	2.47591	0.530542	2492.55	1.03272	83
320	163	1865	750	48.8215	1.15893	0.534189	1898.43	0.966422	77.5
320	163	5000	730	29.0786	0.712697	1.91833	5510.91	0.894641	74.3333
320	163	5000	5000	77.9221	1.7147	3.05546	12745.9	0.853328	68.3333
230	62	5000	167	43.7402	1.00288	0.706894	2260.2	0.981587	82.1667
561	285	5000	562	20.2531	0.573125	1.75679	3533.04	0.926582	75.6667
320	163	5000	5000	53.5072	1.39538	1.72363	4231.89	0.823346	68.3333
334	90	5000	355	25.3119	0.664752	1.11464	2098.79	0.879384	77
220	112	5000	1373	47.8696	1.11386	1.06635	3663.14	0.907625	73.8333
561	285	2124	494	32.4003	0.713689	0.576616	2229.96	0.97658	79.8333
200	102	536	94	40.4718	0.833222	1.4088	7731.39	1.06721	85
276	140	830	132	25.2408	0.606898	0.865437	2723.55	1.0061	82.3333
585	158	5000	1363	62.8602	1.50347	1.16965	3232.23	0.960038	81.6667
320	163	5000	579	45.7256	1.08195	2.43819	8405.58	1.02564	82.6667
220	112	265	53	48.1791	1.0912	1.22115	4579.96	1.13481	92.5
320	163	3992	531	38.2453	0.875678	1.24052	4208.75	0.958966	78.8333
320	163	16	18	17.6439	0.428469	0.598922	1992.21	1.16965	94
220	112	5000	1572	28.7762	0.762646	0.866013	2012.08	0.789503	65.5
220	112	2599	474	68.9426	1.33236	1.50205	7349.05	0.986677	80.5
320	163	2441	434	36.2976	1.00778	2.20496	7935.35	1.00889	82.5
220	112	2513	668	68.6717	1.69453	1.14277	5810.86	0.975637	78
334	90	2248	201	51.8478	1.13289	1.10077	3681.37	1.01688	85.8333
220	112	1058	198	52.5392	1.09802	2.10701	9405.46	1.04837	84.3333
393	200	2300	421	37.2454	0.945404	0.836088	2426.28	1.00148	80.8333
320	163	222	57	17.9696	0.422907	0.674561	2147.72	1.0277	84.6667
320	163	266	79	19.6712	0.512518	0.581156	1453.12	1.03534	85.6667
320	163	2271	273	25.4958	0.583134	2.03015	7046.54	0.958546	78.5
561	285	4744	840	54.7669	1.35544	1.43481	4494.96	1.0132	81.5
320	163	4162	1266	73.295	1.80691	1.20772	3926.73	0.962744	77.6667
230	62	591	123	80.1286	2.03605	3.68798	8200.73	1.07432	92.3333
561	285	1923	318	32.7672	0.801015	1.54136	4759.15	1.04871	85.3333
320	163	4230	2426	52.9546	1.14679	0.514768	2121.98	0.883994	71.5
320	163	1548	315	75.1549	1.83034	1.30728	4660.17	1.05007	82.6667
220	112	293	55	97.1477	1.99274	2.03748	10750	1.14616	89.6667
220	112	1394	233	47.6985	1.1339	1.14182	3663.14	1.02293	84.1667
200	102	2605	944	37.8094	0.847972	0.497005	2249.82	0.867796	69.8333
561	285	5000	4289	41.2313	0.980626	1.19122	3596.23	0.846185	70.3333
200	102	1728	181	28.3056	0.612648	1.49686	7863.17	0.952539	75.3333
220	112	2269	234	21.9624	0.597229	0.915274	2138.6	0.917851	75.3333
320	163	1485	409	53.3924	1.19814	0.665495	2689.01	1.01027	80.6667
334	90	960	100	79.1308	1.94662	1.19449	3328.76	1.08371	90.5
220	112	58	28	31.9218	0.728868	0.59467	2360.11	1.15009	91.3333
320	163	1190	287	126.026	2.42473	1.6717	8560.61	1.05912	85.8333
561	285	4458	621	34.0842	0.846009	1.14752	3431.81	0.988136	80.8333
320	163	2318	277	26.6274	0.671337	1.39088	3806.12	0.976436	80.3333
200	102	878	174	58.3297	1.50936	1.04056	3823.79	1.05101	82.6667
220	112	5000	1653	35.4541	0.969819	1.51956	3609	0.845334	68.5
220	112	83	31	23.7252	0.634737	0.810265	3098.71	1.13446	93.8333
561	285	3436	598	40.139	1.00543	0.93431	4532.08	1.00932	82
220	112	1307	346	87.4112	2.15784	1.30336	6245.85	1.02365	83.3333
220	112	513	90	23.0899	0.654699	1.39687	5421.01	1.04998	84
561	285	368	418	28.2034	0.809657	0.288768	865.51	1.0177	85
561	285	263	17	7.93405	0.196074	0.576499	2729.35	0.86933	70.3333
230	62	231	28	36.9797	0.9589	1.54795	6200.36	1.14195	95
220	112	938	127	19.2797	0.504578	0.668364	2955.99	0.936629	76
220	112	74	22	43.2574	1.14354	0.801593	3565.76	1.19471	95.1667
220	112	310	146	29.5144	0.751431	0.414043	1741.11	1.01188	83.5
220	112	2287	628	75.2896	1.88571	1.97177	9800.27	0.98974	79.5
220	112	4578	1465	62.4564	1.66618	1.3522	5274.42	0.925185	76
561	285	300	89	26.8856	0.723713	1.01427	4016.85	1.14111	93.5
220	112	167	53	27.7869	0.640257	0.639458	3731.3	1.07868	86.3333
220	112	271	56	98.9731	2.50938	1.03682	4294.21	1.12416	93
220	112	1993	367	51.7181	1.38713	1.33456	5127.11	1.00582	82.8333
561	285	760	207	34.8323	0.791264	0.652127	3251.77	1.06705	89
561	285	1290	269	29.102	0.641932	0.68129	3791.3	1.01424	83.6667
220	112	1711	343	52.8978	1.39053	1.05915	5006.73	1.00819	79.5
220	112	1901	324	51.5333	1.27249	1.44399	7982.62	1.01046	79.6667
561	285	1405	273	65.1513	1.66854	1.03184	5052.69	1.09054	87
585	158	1477	146	34.2766	0.972987	1.00322	2767.35	1.07238	91.6667
220	112	168	53	21.1989	0.565118	0.611766	2610.11	1.05856	85.6667
220	112	5000	815	45.1724	1.03377	1.74799	9362.59	0.920028	75.3333
220	112	4374	1501	75.5866	1.76295	1.93008	10925.1	0.93027	74.8333
561	285	2265	1310	99.5773	2.07594	0.623625	4270.73	1.00008	80.3333
585	158	731	155	45.6275	0.990701	0.497552	2817.84	1.06339	88.1667
230	62	648	397	98.7607	2.14592	0.463953	2291.67	0.985481	83.6667
585	158	5000	1417	21.6468	0.659892	1.09079	2689.01	0.781833	66.1667
220	112	4091	667	47.3582	1.04861	1.94793	12712.5	0.941154	74.5
220	112	1956	337	31.1985	0.693461	0.643448	3678.76	0.919107	75
220	112	2575	466	51.9221	1.25983	1.22281	6332.05	0.980964	78.8333
220	112	787	335	98.3374	2.61101	0.89372	3915.61	1.02472	81.8333
220	112	5000	1480	38.2864	1.06803	0.917011	3376.3	0.873604	71.1667
220	112	726	143	62.5012	1.60888	1.04337	4128.76	1.07166	89.3333
220	112	933	201	78.2015	2.06428	1.36691	5988.76	1.05603	84.3333
220	112	2882	442	43.6307	1.0689	1.40461	6834.1	0.97083	78.8333
220	112	248	59	25.0991	0.612285	1.50031	8420.96	1.0872	85.5
561	285	5000	5000	50.1142	1.27333	1.02934	4104.31	0.804042	67
200	102	124	39	21.0589	0.472871	1.65784	7224.87	1.08459	87.8333
220	112	632	2092	45.5948	1.15573	0.253596	1159.38	0.888857	72.3333
220	112	144	102	28.2374	0.758864	0.356935	1290.4	1.04376	86.8333
220	112	2749	1001	74.8863	1.68517	0.892496	5607.43	0.949859	75.6667
220	112	2309	206	21.1223	0.536683	0.892398	4018.27	0.898866	73.3333
220	112	2623	859	51.6071	1.29534	0.711993	3381.09	0.939847	76
220	112	5000	5000	48.5253	1.23302	0.506476	2416.84	0.794632	63.6667
220	112	5000	1917	49.1283	1.1914	1.13527	6005.19	0.869978	69.6667
220	112	2189	4518	40.7034	1.08935	0.337093	1314.87	0.817653	67.1667
220	112	561	55	15.3464	0.379095	1.2587	6597.85	0.955448	76
220	112	5000	3699	81.9123	1.74388	0.981438	5643.41	0.871388	72
220	112	2128	318	31.5517	0.799717	0.86258	4054.05	0.952392	76.5
220	112	156	30	56.2976	1.48098	1.11163	4866.9	1.17689	94.8333
220	112	515	379	45.6111	1.19713	0.389192	1675.71	0.99417	80.3333
220	112	5000	2395	32.8331	0.967176	3.06033	10146.6	0.819349	66
220	112	1354	219	47.9039	1.07559	1.65249	10493.4	1.03119	82
220	112	4554	801	41.6169	1.10494	1.18026	4952.13	0.926233	75.1667
220	112	674	147	40.5869	0.88471	0.721035	4136.31	1.03115	85.1667
585	158	1872	183	28.5342	0.793672	0.837061	3009.92	1.0299	85
220	112	4700	2110	64.294	1.73062	1.05981	3919.78	0.904954	75
220	112	3547	1132	71.3022	1.80515	1.3708	6314.72	0.94676	77.5
220	112	585	166	76.2661	1.97346	0.798434	3558.18	1.06327	86.1667
220	112	5000	690	35.8123	0.91383	1.5746	7288.85	0.912728	73.5
561	285	970	208	35.6542	0.925336	0.856019	3785.93	1.08452	88
220	112	1971	435	55.3384	1.35741	0.942607	5371.7	0.98956	77.8333
561	285	5	5	1.62536	0.0424248	0.730149	2690.92	1.14968	96.1667
220	112	5000	1146	36.1874	0.844016	0.695689	3937.89	0.851539	68.5
585	158	969	210	32.5309	0.77905	0.449299	2339.28	1.01456	82.8333
585	158	2643	514	48.5166	1.31189	0.583859	1897.76	0.999833	84.6667
220	112	4158	5000	76.4575	2.04792	0.690527	2193.89	0.830124	70.5
220	112	3422	498	40.9665	0.976645	1.24218	5994.23	0.948223	78.3333
220	112	1087	208	24.2948	0.70141	0.645541	1848.62	0.966426	81.3333
561	285	1749	311	48.4732	1.21763	1.10103	5440.86	1.0745	85.6667
220	112	46	51	18.3088	0.435755	0.274063	1225.74	1.0071	84.3333
220	112	5000	698	27.8652	0.772511	0.937877	3249.47	0.872899	71.8333
561	285	5000	5000	45.9553	1.2338	0.672458	2449.62	0.842487	70
561	285	3378	991	96.8006	2.05708	1.03974	6834.1	1.01478	82
220	112	3164	792	66.3517	1.66178	1.53655	6277.32	0.965925	81.3333
220	112	797	133	37.1389	0.90005	1.08917	5674.44	1.04632	84
561	285	678	157	62.4341	1.59868	0.782976	3342.95	1.12278	92.5
220	112	3074	540	45.6275	1.24223	1.56619	5805.56	0.972211	79.8333
220	112	1505	253	54.7963	1.18015	1.17813	7749.04	1.02004	81.8333
220	112	845	125	24.9682	0.654818	1.50138	6366.86	1.0184	82.5
263	134	12	5	48.7778	1.22654	1.33192	6640.19	1.33813	107.333
220	112	74	61	19.926	0.531733	0.3272	1349	1.03299	83.3333
220	112	5	8	9.90282	0.299582	1.80992	5450.81	1.14357	92.6667
220	112	124	30	46.9783	1.20792	0.870574	3773.87	1.1713	96.1667
220	112	5000	151	45.9553	1.12666	0.848662	4321.77	1.06303	85.6667
230	62	417	59	26.864	0.78973	0.617651	1397.55	1.04347	91.3333
220	112	1545	777	53.7472	1.36897	0.546152	2528.15	0.954122	76.8333
585	158	1156	118	28.6376	0.798156	1.44866	4577.87	1.08307	91.3333
220	112	1880	1429	89.1974	2.08862	0.700788	3822.34	0.942167	75.6667
230	117	830	169	43.8107	1.22447	1.44069	5445.83	0	0
393	200	2942	484	39.7102	0.917314	0.916304	4945.35	0.987299	80.6667
561	285	5000	780	20.7352	0.541183	0.818012	3378.69	0.921953	75.6667
220	112	1743	274	33.9747	0.729378	0.75268	4988.47	0.94853	76
585	297	5000	4944	37.9045	1.03241	0.479632	2006.39	0.861041	68.6667
220	112	803	242	39.7458	0.933567	0.555541	2984.42	0.997744	80.3333
220	112	3593	1832	90.5486	2.18913	1.56377	7382.7	0.927871	76.3333
561	285	560	526	33.0317	0.850604	0.311832	1215.35	1.00513	84
220	112	360	94	22.4942	0.602995	2.36509	10362.1	1.05812	84.5
220	112	2931	2618	81.0083	1.79246	0.65128	4204.9	0.899129	71.8333
220	112	3456	871	35.8988	0.985634	0.688318	2604.57	0.904314	73.3333
220	112	328	145	31.4884	0.803082	0.436297	1979.54	1.02069	83.1667
561	285	293	147	28.0902	0.760864	0.462106	1806.51	1.0894	88.6667
220	112	87	31	27.201	0.709938	1.4133	5837.47	1.16564	95.6667
220	112	5000	3761	63.4366	1.7126	1.01944	3665.74	0.868347	71.6667
561	285	4396	1885	78.2995	1.94639	0.814943	4087.46	0.97576	78.8333
561	285	5000	3750	48.3	1.11676	1.38422	8200.73	0.880998	70.3333
220	112	450	191	48.6818	1.25632	0.503582	2375.22	1.04081	82.8333
220	112	980	151	22.8636	0.615157	2.06962	8903.67	0.998726	80
561	285	244	66	57.0074	1.36238	0.721391	3816.93	1.17898	95.1667
220	112	5000	766	36.9797	0.870222	1.08674	6110.37	0.890635	71.1667
220	112	643	1576	156.252	3.86357	0.781287	4228.02	0.948501	75.6667
220	112	2646	403	31.1484	0.854596	2.23862	8960.81	0.960545	77.1667
220	112	3192	631	48.7167	1.24684	1.09363	5298.57	0.957228	76.5
220	112	225	52	33.6619	0.831985	1.047	4979.36	1.11846	91.1667
220	112	3628	643	43.8656	1.03201	0.975084	4813.82	0.933606	76.8333
561	285	1426	855	163.538	3.82334	2.22816	12197.6	1.024	82.8333
561	285	949	174	50.6009	1.21665	1.42779	7065.88	1.12304	91.6667
220	112	2659	556	42.3989	1.02868	0.792634	3915.61	0.944484	76.5
220	112	357	33	11.3495	0.313288	1.19843	4615.67	0.944614	75.6667
220	112	1280	231	55.1407	1.21714	1.04292	6531.86	1.02742	82.5
220	112	147	62	19.7425	0.49923	0.430064	2099.53	1.01482	81
220	112	148	84	26.7993	0.736407	0.402333	1537.39	1.05467	86.1667
220	112	931	165	55.1407	1.52533	1.41254	5236	1.06558	87.5
220	112	1921	355	58.1826	1.34902	1.84319	10919.9	1.01252	80.8333
561	285	4241	1019	82.3975	1.77865	1.15201	6969.69	1.01003	82.1667
220	112	107	33	46.0376	0.991926	0.743697	5259.98	1.1586	91.1667
561	285	5000	2762	35.3402	0.800429	1.31337	7532.61	0.838683	67.8333
220	112	3051	992	57.9954	1.43682	0.821949	4185.74	0.93894	75.6667
220	112	345	68	56.7021	1.43002	1.96903	8977.19	1.13544	91.6667
220	112	1751	5000	52.3139	1.26649	0.302947	1690.03	0.806331	64
561	285	260	111	30.8492	0.768719	0.546882	2573.36	1.11443	91
220	112	5000	610	28.2034	0.754057	2.12294	8155.9	0.890464	73.3333
220	112	5000	4745	40.8932	1.05765	1.25012	4607.24	0.773098	64.6667
561	285	683	1303	29.4907	0.770618	0.232231	909.513	0.927906	76.8333
220	112	536	5000	108.433	2.6173	0.328106	1735.57	0.886628	71
230	62	1795	92	18.5944	0.492707	0.734528	2666.23	0.894366	75
220	112	347	175	28.8225	0.692207	0.379632	1833.61	0.984277	80.6667
220	112	3165	597	35.7116	0.953397	0.815376	2992.89	0.92791	77
230	62	273	37	30.0775	0.842025	0.747318	2172.22	1.09147	93.3333
220	112	3644	484	36.6765	0.908205	1.37294	6928.42	0.941089	75.3333
220	112	1430	250	52.4264	1.24555	1.15228	6830.98	1.02454	80.5
220	112	5000	1200	51.6996	1.26984	1.96582	9711.13	0.917734	74.3333
220	112	2505	1008	63.3119	1.47143	0.705997	4080	0.940845	76
561	285	5000	1948	36.6765	0.985378	1.22012	4662.3	0.913909	74.6667
220	112	415	514	26.5846	0.662154	0.249944	1179.69	0.892408	72.8333
220	112	880	160	36.3757	0.951562	0.895069	3996.96	1.03343	83
220	112	2962	349	31.5517	0.760598	1.13494	5523.52	0.936656	76.6667
561	285	1214	531	33.8928	0.907415	0.446727	1796.29	1.00737	82.3333
561	285	1801	361	60.0018	1.7094	2.11009	7362.48	1.08678	88.5
220	112	5000	714	36.2262	0.876594	1.28527	6902.72	0.89931	71.8333
220	112	2118	623	48.4905	1.2146	0.692368	3070.56	0.955686	78.1667
220	112	1234	438	24.1099	0.596893	0.37563	1655.72	0.864123	71.3333
274	139	3072	509	35.5112	0.798063	2.62694	16010.6	0.953386	76.3333
200	54	1354	236	35.8555	0.996863	0.547838	1453.28	0.951885	78.3333
220	112	368	187	26.5526	0.712355	0.380263	1509.32	0.983356	79.8333
220	112	286	136	25.2916	0.677709	0.398669	1471.06	1.00189	82.3333
200	102	1133	196	26.7231	0.613794	0.608298	2483.07	0.93446	75.3333
230	62	1906	98	19.1214	0.520341	0.813871	2407.52	0.906754	78
318	162	325	85	46.1697	0.97578	0.74039	5031.98	1.11171	89.3333
220	112	5000	1659	40.8713	1.07189	0.834474	3538.72	0.866156	70.1667
220	112	1961	422	48.0843	1.17077	0.841328	4156.16	0.979465	79.3333
318	162	744	258	36.9797	0.973979	0.524167	1817.55	1.02565	85.5
318	162	1558	280	43.0104	1.12751	0.989718	4377.24	1.03449	84.1667
320	163	5000	852	40.8713	0.96865	1.0039	5031.98	0.932266	76.6667
318	162	1381	607	35.8123	0.938655	0.450713	1725.4	0.958475	79.6667
320	163	451	108	43.7558	1.1361	0.760973	3391.24	1.10235	89.3333
318	162	5000	776	31.9603	0.888939	1.29145	4307.67	0.927764	76.8333
220	112	965	201	44.1492	1.18822	0.841101	3550.7	1.03398	82.3333
220	112	209	34	90.9221	2.30556	1.59361	7920.69	1.163	93.3333
320	163	732	89	15.4928	0.420592	1.20714	4849.92	0.981236	79.5
561	285	4393	1036	76.8279	1.89414	1.51223	7516.22	1.01347	81.3333
220	112	745	128	47.3244	1.28843	1.4938	5537.21	1.07978	88.6667
220	112	1623	129	20.9026	0.458225	0.872765	5200.6	0.899164	73.3333
230	62	627	193	26.3399	0.665186	0.331526	1292.06	0.917783	77.3333
220	112	283	100	52.671	1.30387	0.558142	2795.28	1.08546	87
561	285	5000	5000	77.5464	1.67835	1.42713	9036.94	0.751428	60.6667
610	164	5000	332	24.2508	0.703773	1.17896	2944.58	0.964002	83
220	112	5000	3141	50.6734	1.20205	1.08092	6863.33	0.834369	65.3333
220	112	672	1494	32.4003	0.787845	0.23535	1053.55	0.847392	70.3333
220	112	324	66	24.1778	0.64417	1.23718	4789.25	1.07396	88.3333
220	112	750	112	25.5061	0.637514	1.07115	4859.92	1.01455	82.6667
220	112	5000	611	34.8744	0.817512	1.54913	8004.53	0.901955	73.6667
220	112	793	144	38.4581	1.0878	0.98055	2940.6	1.05381	88.8333
220	112	5000	3320	51.8943	1.35226	0.940821	4050.8	0.849789	68.6667
230	62	1063	96	32.102	0.891748	0.924726	2770.84	1.02062	86.8333
220	112	1866	388	50.7915	1.39771	1.033	3630.77	0.999842	82.8333
220	112	2071	568	35.0995	0.890191	0.575193	2744.75	0.923604	74
220	112	523	123	28.5801	0.758743	2.35856	10310.5	1.06286	85.6667
220	112	1713	463	60.2708	1.42013	0.801533	4438.79	0.988247	79.1667
561	285	2815	870	46.0047	1.13449	0.60214	3180.38	0.992324	78.8333
220	112	5000	1329	50.4291	1.20264	2.01909	9099.21	0.903568	75.5
230	62	579	76	30.676	0.68624	0.57866	2808.54	1.00125	84.5
220	112	5000	3035	37.4661	0.954384	0.718639	3418.85	0.796309	63.8333
230	62	1509	512	47.4856	1.17535	0.446973	1926.3	0.92984	77.6667
220	112	2606	5000	133.743	3.29968	2.02347	10851.2	0.858129	68
585	158	5000	1549	28.6837	0.797388	0.669171	2247.17	0.842534	70.3333
220	112	908	193	60.5195	1.57782	0.96464	4380.25	1.05088	84.1667
219	112	241	92	30.2838	0.675613	0.479584	2619.71	1.0347	85
220	112	3373	2238	57.3657	1.42661	0.602322	2948.56	0.888688	71.5
220	112	5000	4065	43.795	1.12994	0.81267	3804.07	0.80733	64.3333
220	112	43	20	30.7131	0.727085	0.778463	4410.43	1.18623	94.6667
220	112	432	86	39.2579	0.956	0.957309	4587.53	1.08507	88.3333
585	158	2816	667	35.6686	0.936727	0.448239	1523.67	0.949339	81.1667
220	112	841	184	47.6473	1.30759	0.834001	3303.03	1.04582	84.1667
220	112	2858	310	27.0918	0.711852	1.2294	5057.39	0.93547	76.1667
561	285	2537	519	47.6473	1.13588	0.835323	3822.1	1.02984	85.8333
220	112	6	5	7.54889	0.170482	0.320949	1888.92	0.951987	76.6667
561	285	1574	324	51.6903	1.14608	0.848555	5132.02	1.06479	86
220	112	2595	595	48.1618	1.27087	0.89902	4048.06	0.962578	77
220	112	175	36	15.0539	0.381508	1.19522	5879.44	1.02865	82
220	112	384	126	48.6906	1.11283	0.570017	3395.82	1.06175	85.3333
561	285	4274	614	28.0676	0.631734	0.704661	3567.53	0.929528	77.3333
220	112	764	521	109.369	2.88243	0.796661	3265.6	1.00191	82.3333
220	112	1087	2233	129.363	2.80321	0.608621	4064.47	0.930987	74.5
230	62	296	47	74.7792	1.81245	0.665822	2500.38	1.1029	95
561	285	5000	5000	118.628	2.7455	1.4384	8718.23	0.890639	70.8333
561	285	3607	962	85.6457	2.1014	1.2691	5681.17	1.01808	84.5
220	112	1754	2923	45.4644	1.09688	0.337096	1640.58	0.849099	69.5
610	164	4678	573	52.464	1.41145	0.902226	2770.8	0.999294	86.1667
561	285	5000	4892	66.2805	1.65907	0.823517	3970.58	0.90917	73.3333
561	285	5000	2641	91.6411	2.28897	1.21798	6053.71	0.961553	77.1667
220	112	356	109	123.569	3.14692	2.60232	10860.3	1.09331	90.3333
220	112	1623	1832	129.41	3.30586	1.51708	7519.67	0.937845	74.6667
561	285	5000	3896	79.6994	2.02876	1.40911	7037.74	0.934841	74.3333
220	112	1965	374	46.7853	1.32146	1.11119	3704.34	0.999341	82
220	112	1790	373	64.5246	1.67222	1.6209	7304.48	1.0163	81.5
561	285	5000	5000	83.5859	2.05118	0.659669	3308.66	0.767406	62
220	112	2680	430	41.2609	1.10621	1.26523	5288.21	0.975295	78.5
220	112	164	31	61.5024	1.46598	1.3086	6286	1.17934	97.5
220	112	2224	414	63.744	1.39367	1.65266	10577	1.00092	80.6667
220	112	704	369	56.9258	1.4921	0.504886	2069.58	1.008	82.8333
220	112	4966	364	22.4175	0.560493	1.00988	5498.6	0.843275	66.8333
220	112	2477	1706	84.3676	1.89021	0.715348	4426.65	0.926587	74
220	112	1562	1129	112.466	2.91784	2.56279	12651.6	0.96645	76.3333
220	112	186	48	35.726	1.0682	0.766143	2354.3	1.13184	92.3333
220	112	1276	215	48.7342	1.23017	1.26488	5426.74	1.03612	84.5
700	189	191	20	61.5905	1.6759	1.6869	6145.02	1.24768	103.667
561	285	954	2459	109.017	2.59568	0.393094	2062.26	0.977891	79.6667
220	112	5000	5000	81.8683	2.09065	1.22053	6114.43	0.817876	65
200	23	257	105	50.5781	1.11279	0.267735	692.49	0.972834	87.8333
561	285	5000	5000	60.7365	1.46332	0.657537	2812.31	0.838985	70.1667
220	112	1845	538	56.763	1.26138	0.702353	4234.9	0.969376	78.3333
561	285	1042	310	72.538	1.7192	0.678518	3249.45	1.08001	89.3333
220	112	17	17	21.5339	0.567586	1.82142	7890.11	1.23055	99.3333
561	285	5000	5000	93.5638	2.18122	0.927282	5837.94	0.885751	70
220	112	5000	960	45.3182	1.09808	1.25288	6153.39	0.911569	74.5
220	112	858	254	61.5024	1.46259	0.690297	3805.39	1.02908	82.5
220	112	1341	273	31.7809	0.844308	0.686292	2780.62	0.97394	79.5
220	112	1408	783	39.441	1.02734	0.437049	1728.24	0.925263	75.8333
220	112	74	21	45.9883	1.17265	0.821175	3743.9	1.19738	96.6667
220	112	131	31	52.7465	1.34497	0.847767	3865.14	1.17054	94.5
220	112	578	115	44.7219	1.20922	0.910293	3931.4	1.07574	85.3333
220	112	2210	1222	86.7255	2.27203	0.989957	4027.22	0.95203	78.3333
585	297	153	118	22.6895	0.611756	0.380605	1324.67	1.08495	90.8333
240	65	734	90	76.6493	1.99605	0.912388	3295.8	0	0
220	112	1387	207	34.3456	0.825381	1.00366	5035.35	0.996669	81.1667
585	158	5000	1727	58.2868	1.38391	0.749043	3552.75	0.922349	77
220	112	587	111	31.1484	0.732302	0.824008	4426.65	1.03293	83.1667
220	112	1016	250	56.4388	1.59277	0.85878	3042.32	1.03414	84
220	112	2699	989	27.7199	0.798335	0.470599	1408.36	0.859837	71.8333
220	112	5000	5000	87.1301	2.11297	1.35484	7166.62	0.753426	60.3333
220	112	1204	247	51.7181	1.35817	0.941928	4442.74	1.02824	81.8333
561	285	5000	1827	29.693	0.64685	0.747697	4354.94	0.820429	67.1667
220	112	2669	371	31.8193	0.869223	1.06979	3876.11	0.954371	78.6667
220	112	1643	703	52.5392	1.37551	0.595083	2514.59	0.960116	78.5
220	112	218	61	60.3032	1.5675	0.661233	2629.32	1.12196	92.6667
220	112	56	23	15.9885	0.394032	1.01699	4873.53	1.09531	89.1667
220	112	1957	374	57.9124	1.46555	1.35104	6398.21	1.00761	80.8333
561	285	5000	2671	122.908	2.61259	1.95977	11015	0.966547	80.1667
220	112	5000	3617	54.2984	1.34309	1.46571	7908.03	0.84005	66.5
220	112	626	484	18.6844	0.497789	0.24568	894.958	0.80638	67
220	112	5000	2130	54.7277	1.26254	0.745576	4588.17	0.873989	69.3333
220	112	5000	3647	50.0425	1.46378	0.943897	3300.47	0.853782	68.1667
220	112	146	37	36.1162	0.904337	1.07899	4962.78	1.15291	94.5
220	112	3196	302	25.65	0.648148	1.28368	6509.47	0.916198	72.6667
220	112	5000	1203	41.7362	0.992405	1.23251	6136.66	0.876858	71.5
220	112	916	246	33.4326	0.913256	0.590856	2329.42	0.993294	80
220	112	5000	1025	42.4596	1.17936	1.58307	5869.81	0.917977	74
220	112	884	169	65.3148	1.6715	1.8784	8726.15	1.0716	85.5
220	112	3526	571	38.7691	0.985115	2.15114	10265	0.948566	76
561	285	5000	990	23.936	0.585595	1.51293	7990.98	0.855958	68
561	285	733	168	30.5161	0.693572	0.839016	4812.02	1.0736	86.8333
561	285	5000	2441	49.2428	1.36915	1.03028	3627.75	0.936753	76.1667
220	112	3707	1121	60.8018	1.5328	1.01608	4825.14	0.935725	75.6667
220	112	3541	1046	64.5246	1.66032	1.1858	4764.23	0.946094	78.6667
220	112	2501	5000	118.416	3.31003	2.40552	8789.72	0.854108	69.6667
220	112	4132	2068	67.9868	1.57818	0.804836	4280.51	0.900155	73.1667
200	102	337	51	34.8464	0.868566	1.37944	4742.67	1.12433	91
561	285	5000	5000	53.4306	1.45705	1.94041	7192.68	0.882906	72.5
220	112	1851	437	51.4319	1.31322	0.848117	3818.89	0.98671	80.5
561	285	5000	2668	38.7275	1.12363	1.638	5439.06	0.910618	73.3333
230	62	74	95	44.2758	1.14176	0.236368	978.973	1.05163	87
220	112	5000	2531	58.2451	1.53718	1.19321	5336.4	0.882171	70.8333
220	112	317	122	61.4364	1.54412	1.29388	6097.81	1.05599	85.5
220	112	5000	1554	84.4885	1.90149	0.74694	4949.29	0.943541	74.5
220	112	5000	1083	46.9615	1.22649	1.18542	4503.62	0.939238	78.1667
220	112	7	13	15.7298	0.416513	0.34629	1490.99	1.14474	92.5
220	112	1931	1103	40.4347	1.09666	0.466636	1866.28	0.908547	73.6667
220	112	2353	481	51.0193	1.2894	2.25833	10246.4	0.992051	80.8333
220	112	3302	2192	50.8006	1.43117	0.600381	2187.12	0.890437	72.6667
220	112	2918	5000	136.061	3.07381	1.01214	5717.37	0.772843	62.6667
220	112	3595	2216	62.2555	1.57955	0.698119	3072.63	0.897493	73.5
585	158	5000	2341	63.4934	1.49014	0.531009	2759.05	0.914176	75.1667
585	158	5000	377	24.5501	0.606456	1.2186	5211.99	0.910727	76.1667
220	112	2632	102	13.9742	0.381048	1.32848	5647.77	0.837614	66
220	112	5000	5000	74.2989	2.10381	2.00736	7657.37	0.855699	68
220	112	4227	1130	69.0909	1.51555	2.1154	12135.3	0.940193	77.1667
585	158	4425	610	46.1532	1.24925	0.742889	2387.88	0.983545	84.1667
220	112	5000	1054	48.1446	1.19832	1.25543	5508.59	0.915921	75.6667
220	112	3490	3421	81.7804	2.321	2.96235	9222.73	0.899657	74.6667
220	112	483	89	52.099	1.07237	1.11613	7643.49	1.09235	87.6667
220	112	2125	268	27.4427	0.668228	0.846303	4721.2	0.93232	74
220	112	1179	261	82	1.97578	1.38115	6670.9	1.04012	85.1667
220	112	398	804	53.5	1.16277	0.272582	1862.32	0.949443	76.1667
561	285	5000	5000	94.2	2.25791	1.00005	5307.43	0.913092	73.6667
561	285	221	293	23.5	0.582966	0.253722	1321.86	0.996491	80
220	112	165	360	45.6744	1.27257	0.258737	959.898	1.00991	82.1667
220	112	200	34	102.032	2.60993	1.37201	5769.48	1.15528	95.3333
561	285	5000	2494	45.1172	1.17684	0.780846	3490.39	0.919772	74.5
220	112	5000	2275	40.246	1.05796	0.769805	2710.63	0.840411	70.8333
220	112	4997	1356	51.3694	1.35833	1.0563	4917.96	0.911724	72.3333
220	112	578	107	73.2118	1.79632	1.19444	6175.76	1.09268	87.8333
220	112	5000	1775	47.9814	1.36985	2.64361	9289.92	0.902002	72.6667
220	112	5000	2263	54.3943	1.45016	2.13621	8922.3	0.886538	72
230	62	151	25	24.1615	0.596311	0.732856	3280.66	1.08836	90.3333
220	112	349	120	21.3078	0.50214	0.389635	1880.21	0.946205	78.1667
220	112	465	86	31.1	0.814805	1.20832	5202.54	1.07667	87
220	112	5	5	5.36141	0.127727	1.36481	6737.81	0.986511	81.3333
220	112	2092	389	25.9172	0.696414	3.1714	12694.5	0.939799	75.5
220	112	1202	498	113.949	2.75397	1.33048	7478.85	1.00438	79.8333
561	285	5	5	2.1666	0.0526738	1.13534	4855.88	1.01435	84.8333
220	112	5000	2658	53.0083	1.42511	1.20143	5044.5	0.870351	70
561	285	973	199	49.5301	1.18785	1.91934	9256.26	1.12228	92
220	112	75	82	72.2143	1.81018	0.333293	1690.11	1.10742	87.8333
220	112	4004	1812	47.0127	1.19305	0.624831	3027.27	0.880066	70.3333
220	112	5000	442	40.7651	1.04303	1.23357	5414.44	0.996986	81
230	117	483	173	54.6699	1.44454	0.597263	2475.71
220	112	2790	491	28.9933	0.702889	0.627597	3417.02	0.886723	70.6667
220	112	4606	1844	78.9206	1.82362	1.35311	8263.81	0.916947	72.8333
220	112	734	127	36.6347	0.924081	1.05256	4228.91	1.05233	87.5
561	285	3623	917	66.8577	1.73369	2.47569	10949.3	1.02906	83.5
220	112	2364	518	60.3757	1.36684	1.00245	5594.22	0.978457	79.5
220	112	3628	844	56.9872	1.49841	1.36529	6395.31	0.953901	75.3333
220	112	1754	189	21.7447	0.545835	0.785561	3618.77	0.914591	74.3333
561	285	4204	1082	68.334	1.72117	1.0053	4561.19	1.00432	81.8333
230	62	5000	1787	82.7125	1.86817	1.45513	6645.99	0.883638	75.3333
220	112	1599	208	29.8629	0.759945	1.25726	5483.37	0.987571	81
220	112	1806	3737	68.6926	1.75084	0.439737	2066.72	0.883919	71
220	112	797	257	53.3827	1.36267	0.626974	2557.59	1.02486	85
220	112	4139	3934	82.3105	1.93664	0.820041	4641.77	0.878473	70.6667
220	112	5000	1882	44.8817	1.20105	0.915914	3097.05	0.8737	73.5
220	112	612	109	52.3711	1.47072	1.2052	4641.77	1.09026	87.3333
220	112	10	8	47.7482	1.16423	1.05918	5767.03	1.25883	99.5
561	285	2338	398	39.7049	1.08407	1.68547	6539.11	1.05939	86.3333
220	112	1303	228	54.5614	1.18093	1.88071	10954.1	1.03826	85
220	112	174	49	31.3558	0.892977	0.746373	2746.5	1.12124	90.5
220	112	121	170	104.172	2.44357	1.84812	10071.1	1.04381	84.5
220	112	3567	1978	76.7018	2.25739	1.6836	4831.59	0.925101	76.3333
220	112	5000	5000	58.6782	1.44994	0.879347	4546.6	0.810697	65.1667
220	112	2356	471	52.9222	1.3755	1.1478	5623.41	0.986301	78
220	112	715	130	46.2719	1.12176	1.01577	5332.39	1.06427	85.3333
275	74	92	11	54.9072	1.60795	0.891526	2420.79	1.21307	103
220	112	1295	213	36.6217	0.888988	0.923802	4530.25	1.00308	82
220	112	31	14	35.4541	0.881491	0.978013	4959.45	1.23561	98
220	112	5000	1952	46.1968	1.2899	1.23723	4552.75	0.879647	71
220	112	180	63	80.7506	2.02338	0.592934	2961.39	1.11929	89
220	112	30	15	13.4403	0.325532	0.887556	4766.75	1.08919	87
561	285	3053	570	64.8023	1.60302	1.63579	8445.16	1.04917	83.6667
585	297	5000	5000	82.4741	1.93927	1.20919	7008.71	0.870002	69.1667
230	62	909	104	86.6085	1.96613	1.16838	5409.79	1.05808	90
220	112	853	139	38.4079	0.916266	1.20402	6370.53	1.04684	84.5
561	285	5000	1570	47.1232	1.2626	1.44394	5463.65	0.962902	79.5
561	285	5000	5000	62.111	1.68074	1.0646	4563.01	0.858243	68.1667
220	112	14	15	26.0652	0.689596	0.430084	1769.24	1.19544	97.3333
561	285	766	189	22.5569	0.624661	0.668281	2368.78	1.04293	85.5
220	112	5	5	1.02822	0.0220731	0.690926	4276.5	0.943949	76.5
220	112	2083	1436	62.6628	1.4811	0.541771	3092.85	0.922169	73.5
214	109	2078	843	80.1553	2.26793	1.24539	4215.31	0.971331	79.5
585	158	751	89	52.2955	1.51703	0.814274	2440.58	1.12146	93.6667
585	158	5000	5000	34.9901	1.02051	0.561727	1446.27	0.737374	63.1667
220	112	5000	4941	60.0497	1.43101	1.25486	5485.84	0.827558	69.5
230	62	1959	549	44.8332	1.1078	0.480073	2022.32	0.916375	76.8333
220	112	5000	5000	76.5496	2.05801	1.32372	5557.95	0.737726	59.3333
220	112	792	439	68.8913	1.55983	0.512427	2594.3	0.999643	83.1667
220	112	2995	1786	103.125	2.42297	1.90538	10226.5	0.934381	75.8333
220	112	5000	1451	43.7302	1.03041	0.875968	5436.65	0.869373	68.3333
220	112	3920	2404	85.044	2.23954	1.9312	8571.6	0.914224	73.5
220	112	5000	68	35.6821	0.826655	1.44575	8770.74	1.15336	91
220	112	3652	5000	95.458	2.3068	0.870787	4469.46	0.868985	70.5
561	285	4584	1939	96.9513	2.50233	1.40611	5676.84	0.981171	80.8333
585	158	1309	329	41.3655	1.07011	0.453112	1654.27	1.01594	85.8333
220	112	2346	366	29.7886	0.79585	0.805064	3212.66	0.93889	76.8333
561	285	4574	2622	106.877	2.53437	1.06881	5157.61	0.964363	79.6667
220	112	17	14	12.0851	0.304891	0.414055	1850.29	1.05279	86
220	112	2915	5000	82.623	2.2711	0.6353	2149.7	0.8476	70.6667
220	112	3347	287	24.5955	0.608251	1.42899	7321.65	0.905904	72.3333
220	112	396	103	56.7922	1.33975	0.701769	3830.03	1.08526	87.8333
220	112	1328	572	98.3969	2.24402	0.885014	5232.48	0.994133	80
200	102	3150	468	41.1867	1.00039	1.71423	5612.1	0.95417	79.1667
561	285	1263	2541	51.639	1.41076	0.303326	1003.25	0.951926	79.6667
223	61	4437	5000	75.126	2.03075	0.673984	2381.68	0.812285	67.8333
220	112	5000	4524	75.8072	1.92967	0.981879	5211.31	0.868134	68.3333
230	62	1931	1226	70.9226	1.66127	0.483571	1624.23	0.907374	80.8333
220	112	2494	1341	81.9695	1.71319	0.713475	5152.97	0.934464	74.3333
585	158	5000	1631	57.6285	1.57113	2.64083	8649.15	0.945921	80
220	112	1776	5000	170.718	3.94773	1.60299	9873.55	0.808976	63.6667
220	112	973	159	26.9524	0.6472	0.736744	3752.84	0.976628	79.3333
220	112	1367	613	112.579	2.81079	1.82053	8645.25	0.995496	80.5
220	112	152	57	40.721	0.923395	0.560629	3722.4	1.10854	86.8333
220	112	5000	2569	65.4606	1.61787	1.13115	5453.81	0.88644	71.5
230	62	335	35	44.9871	1.11343	1.1619	4820.72	1.12225	94.3333
220	112	2998	495	37.3617	0.942208	0.920326	4666.92	0.941414	74.6667
220	112	597	375	74.5317	1.53869	0.466593	3447.6	1.00953	80
230	62	172	48	69.6288	1.66938	0.46151	1690.59	1.10148	96
220	112	455	285	58.6676	1.45545	0.443213	2288.2	1.02409	81.6667
585	158	1806	300	62.5046	1.39742	0.637162	3236.73	1.03874	87
220	112	370	77	51.49	1.31069	0.888458	4437.37	1.10672	88
214	109	1039	186	36.323	0.893609	2.085	10098.4	1.03367	84
220	112	1885	618	58.657	1.59059	0.793832	2987.63	0.976712	80
220	112	4285	2509	84.0672	2.13994	1.99119	9944.95	0.909688	72.3333
561	285	2371	534	45.7734	0.940314	0.689886	3063.6	1.00937	82.5
220	112	212	71	118.544	2.64045	0.702084	4087.87	1.10728	90
320	163	1751	2025	58.7206	1.42221	0.402329	2003.2	0.925913	75.5
220	112	35	19	24.6833	0.624237	1.04966	5008.83	1.19403	95.6667
220	112	4346	4587	87.4726	2.08698	0.924955	5483.37	0.873935	68.6667
220	112	1123	3196	105.649	2.61405	0.523827	2895.8	0.913221	72
585	297	5000	5000	109.77	2.53482	0.756455	4002.77	0.896627	73.5
220	112	1706	1459	121.665	3.03064	2.36309	10089.3	0.951678	78.3333
220	112	3465	567	46.4392	1.1357	1.55023	7374.6	0.959474	78.8333
220	112	1497	5000	143.125	3.36052	0.805987	4743.2	0.876412	69.5
561	285	959	179	47.3534	1.10637	1.24442	7184.47	1.11419	89.3333
220	112	4923	3023	58.7206	1.33101	0.655236	3552.1	0.859133	70.6667
230	62	1320	189	39.5903	0.948814	0.596037	2876.22	0.972433	80.3333
220	112	4190	1133	35.1024	0.946729	0.657971	2187.97	0.877196	74
561	285	5000	3144	56.3022	1.46829	0.591207	2644.07	0.929912	74.6667
220	112	5000	913	40.1662	0.935588	1.14734	6797.33	0.889349	71
220	112	5000	3256	55.1456	1.32415	0.718684	3890.28	0.851852	68.5
220	112	3681	5000	91.7417	2.25476	0.669122	3063.6	0.808658	66.3333
200	102	2581	1424	59.1887	1.60434	3.90089	10667.4	0.936364	76.6667
220	112	687	96	17.069	0.410282	0.504495	2709.47	0.895137	71.5
220	112	1304	266	53.0561	1.3655	0.964331	3729.99	1.02378	85.6667
220	112	5000	2948	63.1624	1.55529	1.58234	7805.15	0.873221	70.1667
561	285	5000	4007	63.4825	1.49445	0.579618	3040.82	0.916517	74.6667
561	285	210	65	35.0649	0.862376	1.13265	5552.95	1.18374	96
561	285	47	5	6.34171	0.13802	0.417502	2663.89	0.847461	68.3333
561	285	5000	3385	57.691	1.61203	1.07834	3970.3	0.928844	75.6667
220	112	4052	1163	52.6459	1.23657	0.820075	4405.51	0.912874	73.5
585	297	5000	2008	52.4468	1.14937	1.02774	6341.9	0.935249	75.8333
220	112	5000	1815	44.0391	1.11392	1.15247	5669.18	0.863481	68.8333
220	112	3936	2408	81.1158	1.84427	0.890453	4842.48	0.902767	73.6667
220	112	460	114	47.4475	1.14551	0.709091	3866.59	1.07103	85.3333
220	112	173	92	52.3049	1.3615	0.445097	1981.56	1.09306	87.8333
220	112	3496	869	37.8572	0.994585	0.701278	2746.5	0.905765	75
220	112	1804	490	42.2864	1.06224	0.648916	3128.74	0.958761	77.3333
220	112	5000	5000	72.2796	1.79714	1.27005	5806.12	0.834111	68.5
220	112	788	145	44.3342	1.10604	0.972965	4550.7	1.05465	85.5
561	285	17	276	42.5775	1.06673	0.132673	580.375	1.09089	90.1667
561	285	4425	883	26.0374	0.591918	0.497885	3113.91	0.878057	70
220	112	722	123	36.1295	0.900716	1.087	5741.12	1.05286	84.3333
561	285	5000	1344	77.0069	1.90301	1.52812	7583.41	0.997579	80.6667
561	285	5000	5000	53.964	1.48579	1.00626	3729.99	0.862609	70.8333
220	112	3967	585	42.4317	0.98275	1.24029	6914.66	0.935725	75.6667
561	285	5000	5000	41.9898	1.16905	2.04248	8047.86	0.864667	69
230	62	833	79	48.7408	1.25928	1.0927	4350.31	1.06474	88.6667
220	112	17	17	28.6036	0.739123	0.43777	2026.44	1.19213	96
220	112	5000	2436	69.0656	1.63924	1.01031	5185.56	0.891583	72.3333
220	112	5000	1719	42.2254	0.984904	1.27296	6577.51	0.844818	69
220	112	5000	3980	68.2847	1.59169	0.925656	5567.98	0.858117	68.3333
220	112	35	21	21.7137	0.570041	0.65474	2683.85	1.15605	95
220	112	2156	764	37.2203	0.983044	0.539506	2219.37	0.917047	74.6667
220	112	5000	2075	60.1473	1.55021	1.65138	7528.96	0.90629	73.1667
220	112	782	166	68.6059	1.50899	0.91543	6092.75	1.05885	84.1667
220	112	5000	748	29.1382	0.735117	0.976142	4362.08	0.852842	69.6667
561	285	5000	5000	63.5513	1.40666	1.09253	6739.42	0.848845	68.3333
220	112	678	124	34.4216	0.877342	1.78157	8373.2	1.06444	85.5
220	112	5000	1216	40.5742	1.05219	0.69006	2698.46	0.919621	76.1667
220	112	155	119	48.3727	1.11789	0.363645	2133.71	1.06792	86.6667
561	285	875	378	80.9111	1.8144	0.551873	3227.95	1.06913	86.8333
220	112	3908	119	57.587	1.55658	1.78087	7315.06	1.09804	87.8333
263	134	107	13	44.5991	1.18905	0.994601	3981.09	1.26743	103.667
561	285	444	80	13.0327	0.34505	0.686849	2740.91	0.983696	80.5
230	62	191	17	97.2141	2.41624	1.21378	5097.58	1.16227	97.5
220	112	5000	3332	66.8215	1.52585	1.86847	11324.9	0.863396	68.6667
220	112	3371	577	51.9662	1.09827	1.11857	8696.02	0.950596	74.1667
561	285	1602	282	31.7038	0.805587	0.991309	4730.4	1.04842	84
561	285	5000	3040	45.1172	1.2363	0.654844	2427.37	0.913351	75
561	285	53	31	30.0978	0.777492	0.745615	3525.69	1.2296	98.6667
220	112	5000	1703	50.6238	1.142	2.15441	13372.3	0.876946	70
561	285	3544	997	83.855	2.28395	1.58624	6248.35	1.01902	82.8333
585	297	3939	685	44.8574	1.04157	0.958911	4702.79	1.0058	83.5
220	112	5000	1657	33.0995	0.974154	1.27755	3866.59	0.845711	69.1667
561	285	5000	2000	55.7058	1.419	1.47653	5842.84	0.955697	79.6667
220	112	2682	456	46.2552	1.20661	1.6602	7040.34	0.983426	79.6667
220	112	1152	210	61.8202	1.55179	1.42167	6782.05	1.04988	84.8333
561	285	3766	967	67.0874	1.47778	0.83727	4709.15	1.00389	82.6667
585	158	2587	208	28.5731	0.791861	1.15253	2772.72	1.02393	91.1667
561	285	72	52	28.4918	0.721206	0.391244	1748.35	1.18541	96.8333
220	112	1019	221	44.3662	1.19671	0.808103	3382.71	1.02732	82.6667
230	62	197	18	75.4386	1.94828	1.38118	5720.48	1.17251	97
220	112	3444	1811	77.4251	1.92965	2.92342	13590	0.930055	76.1667
561	285	2640	1233	129.272	2.97329	2.28623	12433	1.01102	82.5
230	62	1408	144	59.6392	1.61442	1.31061	3978.39	1.0352	88.6667
220	112	5000	5000	63.9425	1.95471	1.96895	5715.32	0.850937	68.6667
220	112	124	60	31.7264	0.871704	0.871984	3334.84	1.04592	84.6667
585	158	361	56	19.3341	0.478174	0.714816	2833.59	1.05865	89.6667
220	112	5000	5000	57.0284	1.67321	1.83005	5834.95	0.820325	67.1667
585	297	3989	748	56.8537	1.20989	0.982271	6559.76	1.01221	81
220	112	5000	3146	46.1051	1.13928	1.38048	6924	0.823104	66.5
585	297	1224	695	38.2349	0.916874	0.393036	2004.56	0.992963	80
220	112	208	75	38.763	0.962962	0.546609	2615.52	1.08962	88
220	112	3451	298	20.0028	0.527368	0.757865	3116.03	0.846173	69.5
220	112	4154	1393	68.7794	1.5441	0.997035	6506.8	0.922205	73
220	112	1808	4669	83.8854	2.03109	0.479052	2313.18	0.881456	71.6667
220	112	538	94	72.7901	1.56282	1.49032	11032.3	1.10554	86.3333
561	285	601	223	52.4278	1.30002	0.541061	2384.91	1.09429	90.3333
220	112	943	486	71.9281	1.90423	0.619774	2799.18	1.00056	79.5
220	112	5000	2263	68.5069	1.61954	1.41498	4972.87	0.894627	72.5
220	112	5000	4435	43.5019	0.988331	0.818182	3139.37	0.769685	62.5
585	158	929	104	31.7603	0.962963	0.908889	1916.75	1.09632	96.1667
561	285	5000	1505	55.3051	1.24277	2.06174	8343.09	0.971191	78.1667
561	285	2553	436	43.1812	1.09949	1.08279	4912.77	1.04319	85
220	112	2390	1580	100.225	2.53509	1.21401	5508.12	0.940914	76.6667
561	285	5000	34	101.683	2.53407	1.07973	4966.16	1.21188	99.3333
561	285	3925	3063	77.9861	1.89461	0.590002	1903.79	0.949146	76.6667
220	112	958	629	107.963	2.62632	0.776971	4354.23	0.991868	78.6667
561	285	2260	531	33.4193	0.862856	0.637128	2733.48	0.999336	81.5
220	112	3648	1700	56.353	1.47746	0.736411	3343.9	0.907299	72.6667
220	112	363	80	49.6913	1.23889	2.15723	10337.7	1.12602	91.6667
585	158	5000	5000	63.4137	1.71757	1.11862	3697.22	0.805256	68
220	112	938	296	77.7893	2.01026	0.844863	3793.81	1.02961	83.3333
585	158	5000	4800	55.7963	1.46922	0.691574	2280.45	0.863082	74.1667
220	112	757	661	102.327	2.4636	0.598919	3193.09	0.990279	79.8333
585	158	685	279	41.899	1.04351	0.358165	1377.29	1.02785	87.5
561	285	663	207	39.4833	1.0289	0.600291	2397.9	1.08848	89.8333
220	112	5000	4208	61.9207	1.59341	1.2002	5924.98	0.852502	67.3333
220	112	213	113	108.627	2.9372	0.613058	2470.58	1.08052	87.5
220	112	529	1189	78.6647	2.26068	1.1824	3598.2	0.920252	76.6667
220	112	5000	285	68.7422	1.94556	0.465135	1698.64	1.03939	84
561	285	5000	5000	78.7215	1.87061	1.5912	9015.02	0.91056	72.6667
220	112	5000	259	36.8261	0.892588	1.87693	10455.1	1.02868	81
220	112	867	216	35.1649	0.945336	0.638765	2407.68	1.00749	82.5
585	158	5000	716	38.4287	1.01744	1.0589	4115.71	0.950854	78.8333
561	285	5000	1246	57.7118	1.43258	1.04885	5134.44	0.986051	79.3333
320	163	716	151	77.537	1.84742	0.964074	4377.82	1.09245	91.1667
700	189	154	17	87.2519	2.14594	0.782283	3778.39	1.22831	100.667
230	62	164	54	52.5795	1.23728	0.406092	1840.27	1.08576	91.3333
561	285	5000	5000	81.7036	2.05759	0.837429	4181.28	0.868757	69.6667
220	112	46	21	40.8092	1.06288	0.57553	2359.16	1.19256	98
220	112	836	761	82.5932	2.09803	0.525147	2419.15	0.980212	79.6667
220	112	1046	271	84.3103	2.27585	1.30632	5106.77	1.0382	84.5
220	112	1583	146	38.5328	0.973753	0.848974	3793.81	1.02831	84
220	112	332	267	42.6775	1.17724	0.70837	2729.77	0.95242	77
230	62	5000	73	43.9914	1.12778	0.402098	1510.98	1.08916	92.3333
220	112	5000	2856	79.0062	2.15951	0.986634	3520.9	0.901535	74.5
220	112	5000	3363	57.5039	1.44314	0.792458	3898.21	0.876026	69.8333
320	163	746	83	47.4218	1.25205	0.971274	3504.22	1.12377	94.3333
320	163	2455	580	56.6591	1.33999	0.848976	4805.55	0.994498	80
393	200	5000	568	79.55	1.7407	0.881401	6038.11	1.03236	81.6667
320	163	529	172	69.428	1.62534	0.623162	3809.29	1.08079	85.1667
220	112	2950	618	56.8639	1.48069	1.48543	6299.21	0.975197	79
220	112	2063	435	54.7094	1.57583	1.87303	5699.9	1.00628	83.8333
220	112	465	115	54.355	1.40321	0.742634	3090.75	1.07969	88.5
220	112	2492	1329	118.159	2.4687	1.48381	10635.5	0.950022	75.6667
220	112	1976	431	70.616	1.70157	1.50121	7882.86	1.00633	81.3333
320	163	4364	897	46.0718	1.18248	0.951771	4439.37	0.953258	76.6667
220	112	5000	927	35.0649	0.947869	1.16133	4937.17	0.890494	70.1667
230	62	4140	258	31.2332	0.79651	1.19315	4219.11	0.918595	78.6667
561	285	858	148	53.4599	1.55711	1.44879	4690.1	1.13667	92.8333
585	158	4624	3045	124.06	2.98852	1.01464	4807.71	0.929254	77
220	112	2223	748	42.3399	1.2187	0.647372	2015.47	0.943836	78.3333
561	285	5000	5000	102.161	2.17138	1.16018	8047.86	0.815334	64.8333
220	112	1625	237	33.3479	0.897402	1.15455	4692.21	0.998339	80
561	285	5000	3255	103.274	2.25671	1.58259	9430.28	0.950252	77.5
220	112	2019	5000	104.549	2.80956	0.74594	3022.3	0.880017	71.8333
561	285	1500	302	31.6361	0.827879	0.793395	3770.71	1.04213	82.8333
220	112	2092	497	78.3247	1.79596	1.71877	10497	1.00088	79.5
220	112	2929	517	40.9716	1.12983	2.05815	6911.55	0.972308	81.1667
320	163	175	29	93.6151	2.50591	1.9885	8260.84	1.19772	96.5
220	112	4019	804	49.3249	1.27641	1.94382	9286.98	0.948578	74.6667
561	285	88	105	20.3585	0.576078	0.315961	1016.15	1.08417	90.3333
220	112	675	1414	139.857	3.40379	0.664587	2885.99	0.954993	79.6667
561	285	1283	1916	72.3709	1.65265	0.35535	2085.04	0.976327	78.6667
220	112	744	137	48.8995	1.3049	1.03914	4284.21	1.06811	86.1667
220	112	316	94	71.9281	1.77123	0.66705	3245.53	1.09603	89
561	285	5000	5000	85.784	2.17101	0.771304	3635.02	0.89874	72.8333
220	112	2689	1182	92.6403	2.21397	2.1855	12664.2	0.957261	75.5
220	112	88	33	50.7152	1.26361	0.567794	2615.52	1.16134	95.1667
49	25	11	7	28.8183	0.705272	0.529175	2694.8	1.14679	92.5
220	112	5000	166	23.9559	0.554255	0.719974	4330.76	0.914627	72.8333
49	25	88	73	97.2317	2.14012	0.471105	2995.75	1.02702	82.3333
220	112	5000	339	113.354	2.85645	1.30788	6070.84	1.03484	84
220	112	5000	1207	26.7802	0.735651	0.611884	2355.96	0.812939	66.3333
220	112	5000	5000	90.4918	2.4077	0.99381	3882.37	0.679859	55.8333
220	112	1588	625	90.2635	2.09431	0.91545	5633.55	0.987439	78.3333
220	112	5000	692	67.5004	1.9442	1.50248	4600.15	0.993277	82.6667
220	112	558	110	96.6368	2.26702	1.4688	8040.62	1.09199	88.3333
220	112	5000	3026	71.5139	1.92598	1.41677	5227.77	0.890348	73.1667
561	285	5000	5000	86.8748	2.17409	1.2548	5824.45	0.76997	62.5
220	112	5000	394	41.0308	1.03688	0.942448	4211.52	0.983421	80.3333
220	112	5000	5000	63.1853	1.596	1.25211	5552.95	0.821197	67.1667
585	158	2883	575	72.9216	2.11771	0.830802	2528.25	1.01228	84.3333
561	285	2338	740	28.6648	0.781096	0.487191	1933.74	0.95872	77.8333
561	285	3363	2891	73.8755	1.95089	0.562474	2458.87	0.954481	77
220	112	2900	835	76.26	1.85806	1.64258	7672.72	0.968696	79.8333
220	112	2879	926	75.6022	1.8254	1.1595	6040.84	0.959122	77
220	112	2625	644	57.7535	1.26578	0.847393	5813.97	0.956754	75.6667
220	112	2577	745	54.5516	1.45225	0.857971	3321.29	0.958462	78.8333
220	112	3458	973	55.385	1.41977	0.935996	4604.3	0.938748	74.8333
220	112	866	129	28.4614	0.655324	0.940523	5787.85	1.00215	79.5
585	297	5000	5000	61.4531	1.5316	0.679293	3350.72	0.896037	72
220	112	3006	5000	85.939	2.05838	0.644047	3760.49	0.871724	68.6667
200	102	2084	411	62.8214	1.47839	1.43108	5753.55	0.996023	80.5
263	134	29	10	63.4595	1.52913	0.657636	3586.01	1.25721	100.167
220	112	5000	861	49.4498	1.05665	1.30129	9203.72	0.915015	72
200	102	1677	268	45.4852	1.02611	1.08797	4166.8	0.995017	82.3333
220	112	4592	4858	89.4525	2.30969	1.27837	5653.89	0.875009	71
230	62	1347	442	43.1889	1.22414	0.456538	1466.03	0.943906	78.6667
561	285	1369	614	47.7309	1.29574	0.498206	1764.44	1.0273	85
561	285	1495	597	39.9926	0.990575	0.482312	2343.2	1.00756	81.1667
561	285	5000	5000	73.3705	1.69853	0.57166	3038.75	0.779998	63.8333
220	112	158	984	97.4778	2.41379	0.265543	1309.83	0.983152	79
561	285	5000	3607	55.5853	1.33098	0.732334	3679.7	0.908898	74
561	285	2248	539	30.0656	0.822195	0.610967	2540.29	0.9917	79.1667
220	112	3322	383	27.8598	0.695649	0.928289	4859.96	0.906296	71.5
561	285	5000	3505	49.5212	1.18977	0.842448	3887.64	0.896097	74
220	112	5000	2659	38.1178	1.02236	1.18559	4554.8	0.815584	67.1667
220	112	1743	466	38.8822	1.15606	0.692846	2118.56	0.971198	78.5
220	112	5000	2117	51.175	1.33839	0.512125	2343.2	0.906365	72.5
561	285	5000	5000	102.161	2.31107	0.62731	3911.46	0.846269	67.5
446	49	2467	153	58.7206	1.60481	2.99785	7556.13	1.03426	92.1667
220	112	5000	472	43.2357	1.22166	0.690944	2168.75	0.998101	83.5
200	54	3519	301	44.8251	1.03553	1.1269	3792.91	0.936369	79.1667
220	112	983	827	116.004	3.10223	0.924362	3745.21	0.978024	79.8333
561	285	5000	1106	57.1933	1.41119	1.35004	6489.24	0.995493	81
220	112	2815	902	57.0284	1.31681	0.743224	4473.49	0.937822	73.5
320	163	4800	1692	82.8919	1.86827	1.22653	4600.15	0.946701	77.1667
320	163	5000	5000	103.947	2.35717	0.768616	4509.9	0.744656	60
561	285	5000	5000	58.5935	1.39494	0.907008	4245.79	0.85511	71
220	112	5000	2621	63.5513	1.55783	1.48366	8930.17	0.897417	70.3333
561	285	5000	3182	37.2876	0.943323	0.790351	3323.54	0.866462	71.5
220	112	1868	470	53.037	1.36598	0.833274	3010.02	0.984606	83.3333
561	285	1979	696	90.7535	2.24519	0.830847	3927.42	1.03562	84.5
561	285	5000	5000	96.2886	2.05237	0.879315	5989.37	0.894355	71.3333
220	112	5000	2118	51.5086	1.4572	1.7096	5613.29	0.907667	74.6667
561	285	641	2607	81.3798	1.71844	0.258453	1730.05	0.968219	78
320	163	5000	5000	67.6467	1.51891	1.05964	6607.2	0.823284	65.6667
561	285	5000	5000	57.4209	1.44308	1.99681	8950.3	0.765497	62.5
561	285	5000	5000	69.1279	1.47162	0.571547	3916.78	0.794858	63.3333
561	285	4587	5000	108.902	2.56673	0.524598	2969.44	0.841179	67.6667
585	158	1948	664	75.0718	1.99307	0.554887	1595.83	1.00477	88.3333
561	285	5000	5000	67.1843	1.46698	1.23378	7229.91	0.806996	66
585	297	5000	1598	55.5151	1.46612	0.999662	3989.21	0.973513	79.6667
320	163	208	63	30.9674	0.751673	0.75936	3504.22	1.1181	92.3333
220	112	1405	226	45.1498	1.12807	1.30858	4389.67	1.02691	81.6667
585	158	1013	201	101.61	2.63679	3.43591	14016	1.09318	90.6667
200	102	654	139	46.9279	1.09332	1.36128	5728.21
220	112	2723	919	61.731	1.54064	0.837997	4261.12	0.949387	75.8333
561	285	5000	4148	100.551	2.12328	1.26049	8437.55	0.933049	75.1667
220	112	1785	404	67.0027	1.42279	0.944684	5473.5	0.997711	82.3333
220	112	2696	822	59.8332	1.44052	0.829964	4358.15	0.95151	76.8333
220	112	5000	1995	49.3516	1.23042	1.60757	7990.09	0.872251	70
220	112	5000	5000	61.4642	1.60952	0.777676	3103.36	0.807822	66.1667
220	112	5000	5000	65.1777	1.73025	1.22927	5106.77	0.769517	62
561	285	1302	271	44.72	1.25687	0.863339	2793.49	1.08223	90
220	112	707	130	38.7211	0.903115	1.84956	10917.7	1.064	84.3333
220	112	575	107	63.1624	1.69211	1.87304	7417.9	1.10246	90.3333
561	285	2186	537	82.862	2.06582	1.04624	4675.34	1.05075	85.8333
220	112	5000	5000	103.386	2.26535	1.25325	7707.35	0.854623	68.8333
220	112	460	92	95.9762	2.41579	1.77227	7624.49	1.10494	90.8333
220	112	127	28	64.7555	1.62536	0.815527	4065.74	1.17398	94.1667
561	285	5000	4854	48.3989	1.28637	0.685352	2653.06	0.885514	72.8333
200	102	1402	325	65.4488	1.70701	2.20791	6807.77	1.02599	83.8333
220	112	3721	1001	60.5393	1.49957	1.09846	5585.56	0.941437	75.3333
561	285	347	156	27.7905	0.726788	0.485908	2092.12	1.07983	87.3333
220	112	412	164	44.6555	1.18664	0.512031	2027.82	1.04754	85.8333
220	112	271	59	19.7305	0.580813	1.30308	3853.49	1.07243	87.1667
220	112	2085	2105	66.4007	1.68198	0.530557	2731.62	0.910095	72
561	285	5000	5000	42.886	1.10154	0.785728	3016.15	0.787748	66
220	112	1779	415	55.9578	1.41365	0.909664	4158.74	0.995356	81
200	102	2177	287	33.0289	0.837846	1.65752	6114.5	0.970948	77
220	112	1048	192	57.1108	1.17488	1.9944	15504.9	1.05313	82.1667
561	285	1257	777	153.065	3.81365	1.18209	5751.47	1.02419	83.1667
220	112	5000	5000	79.6649	1.83271	1.30932	7875.77	0.814165	64.8333
561	285	714	794	60.1581	1.45838	0.344849	1894.77	1.02212	81.3333
220	112	2731	2075	95.2343	2.45587	1.12299	4389.67	0.925284	73.6667
220	112	2023	376	52.6745	1.3857	1.29383	4639.68	1.00363	84.3333
561	285	5000	5000	45.1172	1.19727	1.20062	5180.89	0.866001	69.3333
393	200	1010	497	63.6776	1.63435	0.528136	2052.74	1.02925	85.3333
230	62	416	95	71.025	1.97268	0.586806	1985.6	1.0615	88.5
220	112	5000	1569	58.6464	1.50361	1.28321	6530.29	0.911974	71.6667
220	112	1401	2085	165.003	3.59869	1.5511	10970.5	0.93196	73.3333
561	285	5000	5000	49.5033	1.3417	0.866211	3067.76	0.80975	67
220	112	487	96	92.1566	1.90347	1.06014	6483.4	1.09772	89.3333
230	62	128	18	38.2418	0.945062	1.00774	4685.88	1.16398	96
320	163	5000	5000	109.929	2.65223	1.2548	7107.24	0.821007	65
220	112	1911	924	89.8733	2.36589	1.07997	4747.47	0.968512	78.6667
320	163	5000	1617	37.3482	0.980837	1.0901	4587.73	0.881498	71.5
561	285	5000	5000	81.2917	2.13362	1.39107	5989.37	0.855977	69.1667
561	285	5000	1177	46.6745	1.13363	0.993434	4747.47	0.970354	79.6667
220	112	2430	685	73.9289	1.92105	1.47592	5800.9	0.981208	80.5
220	112	3445	884	63.1283	1.64952	1.56095	6276.55	0.958433	78.3333
220	112	1842	2517	100.045	2.1873	0.605804	4350.31	0.915212	71.8333
320	163	5000	4345	70.5396	1.77997	0.823337	4093.42	0.888053	70.6667
561	285	3719	475	29.0967	0.687735	1.05228	5871.86	0.977001	78.1667
220	112	5000	175	42.4087	0.871027	0.803824	6076.31	1.04926	82.8333
585	297	444	96	78.0565	1.77252	0.812337	4062.98	1.15556	96.3333
561	285	2194	1407	44.0312	1.10056	0.410519	2071.64	0.959827	76.8333
220	112	1949	276	33.5265	0.898587	1.18638	4966.16	0.985898	79.3333
561	285	5000	5000	93.632	1.99387	0.4905	3325.8	0.837299	66.8333
561	285	5000	1888	58.6464	1.38477	1.8345	8142.65	0.96097	80.5
561	285	1186	219	57.7639	1.3994	1.0664	5473.5	1.10318	89.5
561	285	4328	818	54.3747	1.36581	1.1332	5735.95	1.01239	81
220	112	5000	951	38.0559	0.823281	1.1601	7515.41	0.855827	68.8333
320	163	5000	4011	53.3057	1.16482	1.36897	8380.75	0.8395	67.6667
561	285	4238	673	38.4564	0.969442	1.03192	5074.68	0.997166	80.1667
561	285	5000	1392	48.6705	1.13974	0.748189	3610.43	0.95831	79.1667
561	285	5000	5000	71.2047	1.55974	1.67773	10384.3	0.892536	72.3333
561	285	5000	5000	40.0648	1.12767	0.964383	3158.61	0.846699	70.3333
220	112	5000	1528	55.978	1.53516	1.82509	6518.53	0.918044	75.1667
561	285	2425	731	42.0809	1.11331	0.601797	2475.62	1.00302	81.6667
230	62	797	71	31.8282	0.878807	1.10646	2714.99	1.04797	93
220	112	5000	2542	53.9251	1.3905	0.945703	3760.49	0.871739	72
561	285	5000	1914	65.2954	1.60699	1.39917	6553.85	0.966741	79
320	163	5000	3000	81.4386	2.13083	1.64847	7011.87	0.920113	74.5
274	139	1539	1867	112.701	3.06912	0.875393	3345.04	0.948589	77.5
220	112	3116	4034	123.323	2.79446	1.54242	9989.84	0.893701	70.8333
320	163	507	158	151.062	3.40725	2.31986	14385	1.08756	86.1667
220	112	270	58	25.1535	0.586747	1.22598	6530.29	1.07267	87.1667
320	163	760	1159	110.526	2.55539	0.47639	2401.15	0.984177	81.3333
320	163	1077	611	29.4721	0.780021	0.364906	1643.08	0.932964	74.1667
230	62	5000	519	37.7276	1.02809	1.24965	4219.11	0.903189	76
220	112	5000	2264	64.9428	1.53272	0.962956	5710.18	0.890149	70.5
230	62	2467	293	38.512	1.02085	0.732264	2389.77	0.946988	80.8333
585	158	5000	1768	88.9052	2.33159	0.968695	2785.92	0.951691	83.6667
561	285	3100	500	35.0524	0.962911	1.05702	3662.26	1.02075	84
561	285	5000	3284	84.6763	2.08287	0.862458	4625.08	0.946465	75
220	112	2311	1033	72.0841	1.97406	0.909965	3642.43	0.956396	76.8333
220	112	2167	2758	56.4345	1.49567	0.457797	1830.93	0.885936	71.8333
220	112	1282	319	27.116	0.734103	0.5334	2199.13	0.937953	75.6667
220	112	4307	5000	109.493	2.45852	1.15951	7229.91	0.858806	68.5
320	163	1018	393	110.846	3.21508	1.57516	5143.7	1.03604	83.6667
561	285	3127	652	65.9112	1.51925	2.20336	8004.49	1.04583	85
561	285	5000	5000	49.916	1.20897	0.838269	4173.75	0.864595	70.5
561	285	5000	5000	102.605	2.48747	0.789656	3991.92	0.827853	67.3333
220	112	1896	319	42.4624	0.977688	0.934678	3653.57	0.981806	78.1667
220	112	1768	2033	82.4443	2.17821	0.625085	2656.66	0.926104	74.3333
561	285	4700	3775	57.6285	1.39895	0.480825	2578.5	0.91702	72.6667
220	112	1318	1481	120.311	3.01827	0.906034	4104.55	0.948856	77.3333
220	112	1082	152	25.2432	0.698518	1.52339	5957.09	1.00959	80.6667
220	112	5000	1391	67.7445	1.36655	1.84557	9498.47	0.913783	72.3333
200	102	2851	464	41.3431	1.02046	1.0595	3625.03	0.950776	77.6667
220	112	735	136	70.2854	1.79303	1.63457	7645.12	1.08344	87.8333
561	285	5000	5000	66.4846	1.57099	1.29487	7975.71	0.853448	67.1667
561	285	1631	473	48.2507	1.23166	0.635974	2594.3	1.04093	86.3333
320	163	3482	5000	53.8862	1.39598	0.332894	1428.22	0.752057	61.3333
320	163	4287	1799	88.7769	2.15067	2.02814	11279.9	0.952835	75.6667
220	112	3644	742	48.5302	1.27596	1.14636	4489.63	0.948034	78.5
561	285	5000	4777	96.6368	2.18625	2.01352	12785.9	0.92849	73.8333
220	112	272	85	33.8866	0.840221	0.584053	2929.4	1.06859	86.3333
561	285	2938	614	47.1487	1.20103	0.844292	4196.37	1.02178	82
220	112	1967	932	34.336	0.89602	0.443427	1894.77	0.889913	72
220	112	149	57	23.9986	0.727459	0.55178	1528.51	1.08718	89.3333
220	112	1318	517	111.972	2.41545	1.06169	7658.91	1.00091	78.5
561	285	2094	515	87.0945	2.32324	1.24051	5547.95	1.05445	84.6667
220	112	680	146	56.069	1.63026	2.32646	8033.38	1.08787	86.1667
320	163	2817	507	32.8881	0.807926	0.720195	2341.61	0.946217	76.3333
220	112	2996	1995	82.3253	1.89471	0.78346	4196.37	0.916782	75
220	112	4397	1087	42.3094	1.10667	0.819758	3334.84	0.903416	74.3333
561	285	5000	5000	51.2675	1.26902	1.16755	5856.02	0.831356	67.1667
220	112	429	82	20.3078	0.533007	0.700518	3016.15	1.00242	81
671	341	28	27	31.4452	0.688569	0.642327	4115.71	1.2501	100
585	158	666	88	40.9273	1.06312	0.753845	2682.03	1.11175	94.3333
214	109	136	41	24.9128	0.66702	0.801741	3063.6	1.10975	90.6667
200	102	356	67	72.4493	1.80702	1.06107	3672.22	1.11455	89.3333
220	112	329	78	35.2025	1.00054	0.774091	2465.56	1.09257	90.3333
561	285	2097	268	22.8398	0.541541	0.994168	4583.61	0.983092	81.8333
230	62	3498	417	28.1189	0.960328	0.716626	1325.48	0.910686	75.8333
220	112	5000	1387	49.165	1.01629	1.47861	11348.3	0.869901	68.5
230	62	2639	1932	72.4493	1.70257	0.518902	2627.08	0.881449	73.3333
585	158	1410	198	112.052	2.65304	1.11617	4687.99	1.0721	91.3333
220	112	2572	505	48.0248	1.05292	0.855505	4280.35	0.954731	80.1667
561	285	337	72	53.5371	1.33012	1.00378	4485.59	1.17929	96.3333
220	112	1513	194	21.9469	0.639835	0.875106	2698.46	0.955439	78.6667
220	112	561	110	59.7038	1.60451	1.00475	4469.46	1.088	86.6667
561	285	5000	1543	36.7929	0.98682	1.14467	4397.58	0.932964	76.8333
220	112	340	88	76.3978	1.78656	0.744817	3907.48	1.10064	89.6667
220	112	3361	1300	65.8398	1.83137	1.07791	4060.22	0.93854	76.1667
561	285	5000	5000	56.0285	1.26777	0.930592	5741.12	0.848942	67.8333
561	285	3780	5000	136.613	3.40998	0.971736	4469.46	0.90484	74.1667
156	80	376	95	64.9897	1.62861	0.780643	3036.69	1.07441	86.3333
212	108	169	57	61.0551	1.35438	0.579184	3814.46	1.12182	88.6667
585	158	5000	3053	79.4352	1.80981	0.691132	3662.26	0.910377	75.1667
320	163	123	98	28.4817	0.742768	0.357307	1597.99	1.07521	86.3333
220	112	875	236	91.1147	2.38707	1.20255	4781.81	1.04528	86.3333
220	112	1241	230	72.3709	1.58269	1.46307	9055.71	1.04472	84.6667
320	163	588	127	38.5189	0.899685	0.830105	4530.25	1.07647	85.3333
220	112	2166	708	39.3908	0.982222	0.5618	2647.66	0.92219	74.6667
561	285	590	210	42.1112	1.05238	0.547492	2468.91	1.08832	89.5
587	298	380	455	45.8893	1.11911	0.319715	1398.96	0	0
220	112	2746	1395	49.862	1.25851	0.570182	2812.51	0.906408	72.8333
220	112	369	82	55.5853	1.23814	0.812299	4679.55	1.09918	89.5
220	112	327	75	31.7377	0.723811	0.790854	4903.93	1.06652	84.5
220	112	1812	953	68.705	1.60876	0.622362	3549.69	0.952194	76.5
220	112	4331	5000	68.6554	1.91281	3.90576	14263.6	0.864097	69.8333
561	285	3467	554	20.4748	0.549441	0.558032	2063.92	0.902943	74.8333
220	112	1130	187	49.5928	1.20743	1.42371	8113.37	1.04746	82.1667
220	112	139	229	66.9906	1.57072	0.295043	1670.07	1.04629	84.1667
561	285	1031	209	36.2326	0.944145	0.93156	4010.93	1.08699	87.8333
220	112	242	195	54.0225	1.39348	0.376925	1744.79	1.04726	84.3333
220	112	4197	1866	73.1854	1.75956	1.02531	5183.23	0.913917	74.3333
220	112	4437	915	50.2052	1.29943	1.31886	5572.99	0.935655	76.5
561	285	5000	917	31.0447	0.900026	1.48718	5190.23	0.967541	76.5
561	285	5000	5000	63.368	1.60371	1.1966	6465.91	0.842369	66.6667
561	285	5000	2041	33.7181	0.822002	0.820105	3727.46	0.875712	72.5
561	285	5000	5000	40.9716	1.15429	0.413865	1458.09	0.790035	64.8333
561	285	4112	4153	132.246	3.2266	2.2212	10328.4	0.945732	78
220	112	1082	155	26.666	0.749903	1.17198	4135.31	1.01166	83
220	112	1247	648	85.4749	2.02838	0.699371	3793.81	0.985413	79.8333
263	134	34	17	33.0524	0.828274	1.31044	6158.96	1.24496	100
220	112	3087	1916	61.3202	1.59714	0.669022	2969.44	0.908004	73
220	112	4562	2139	61.8091	1.55529	0.851298	4284.21	0.89615	71.1667
220	112	174	38	99.5401	2.23192	0.838708	5746.29	1.14834	90.1667
561	285	2726	584	69.428	1.65241	1.0304	4608.44	1.04187	87.1667
561	285	4900	2373	30.3777	0.720505	0.382392	1656.52	0.846117	71.1667
561	285	5000	831	29.831	0.734047	0.730419	4162.49	0.934078	73.6667
561	285	5000	1271	40.2387	1.04947	0.978993	4019.1	0.955822	78.6667
220	112	3799	1146	67.5248	1.75679	1.62756	7735.17	0.945672	75.1667
220	112	1180	268	51.1381	1.38956	0.859073	3412.69	1.02356	82.3333
220	112	834	224	105.383	2.5884	1.75084	8649.15	1.05148	85.1667
220	112	120	233	35.0649	0.754878	0.231434	1261.84	0.985655	82.1667
220	112	327	46	13.3097	0.348746	1.89716	8680.37	0.975124	78
561	285	4679	1044	55.2651	1.3498	0.914117	4481.55	0.993425	81
561	285	3007	1028	65.8636	1.53103	0.680031	3506.6	1.00209	82.5
561	285	5000	1634	34.5198	0.934185	1.89601	7474.9	0.927075	74.6667
561	285	519	131	54.7884	1.48361	0.718417	2671.13	1.13313	93
561	285	153	88	36.8593	0.994729	0.452705	1880.67	1.14807	92.5
200	54	2008	211	65.5552	1.40897	1.17305	4369.41	0.992609	84.3333
561	285	1747	322	56.8229	1.41925	1.07787	5157.61	1.07737	87.1667
585	297	5000	3399	77.677	2.02345	0.79942	3130.86	0.946021	78.3333
220	112	699	130	63.3451	1.59686	1.13421	5468.57	1.07861	87
561	285	5000	4661	38.7001	1.10762	0.621879	1950.87	0.868625	72
220	112	5000	5000	66.9181	1.72883	2.13738	9515.6	0.848315	68.1667
585	158	5000	839	48.6003	1.36149	0.816842	2523.11	0.968702	82
220	112	112	28	50.8803	1.20901	0.849966	5115.98	1.176	92.1667
561	285	1823	530	51.3601	1.32385	0.655423	2898.75	1.03728	84.1667
220	112	317	80	120.834	2.76042	0.993986	5356.45	1.10125	90
220	112	5000	587	31.1443	0.701054	1.01207	6465.91	0.864392	68.6667
220	112	976	790	48.7056	1.42337	0.435288	1394.22	0.959471	78.5
561	285	1638	283	60.6597	1.50824	1.43213	7282.19	1.09238	87.3333
220	112	3692	829	49.6644	1.27544	1.01541	4645.95	0.939702	75.1667
585	158	1371	138	49.4498	1.27829	0.995201	4090.65	1.09054	90.3333
220	112	275	221	43.2201	1.06973	0.353706	1854.06	1.0225	81.3333
220	112	4955	1283	51.1473	1.25595	0.965777	5194.91	0.906963	71.8333
220	112	3657	1549	55.5452	1.33774	0.696739	3669.72	0.903683	73
220	112	1156	161	27.5442	0.628442	0.839387	5284.57	0.970109	76.6667
561	285	86	46	35.5173	0.847114	0.587012	3201.77	1.19392	96.8333
561	285	3469	557	26.2796	0.640852	0.669699	3542.47	0.942823	75.5
561	285	1616	282	40.5815	1.11086	1.1678	4299.67	1.0782	87.8333
561	285	5000	829	26.6565	0.651053	1.24639	5132.13	0.908939	76.5
212	108	138	30	14.9235	0.36964	0.89464	4346.4	1.02411	82.5
320	163	766	1117	54.8775	1.57226	0.351132	1068.55	0.972266	81
561	285	2410	418	26.9716	0.760344	2.0475	6625.08	1.0272	85.5
587	298	2307	471	59.2315	1.64587	1.86992	7367.96	0	0
220	112	3485	259	23.3081	0.494615	0.776239	5040.51	0.835707	67.6667
220	112	5	5	1.2147	0.0310062	0.85893	3667.24	1.14606	94.3333
561	285	1037	188	19.7515	0.531546	0.792063	3182.28	1.01415	82.1667
410	111	5000	3110	58.763	1.32194	1.80963	8637.47	0.848796	71.8333
230	62	2975	506	34.7418	0.91059	0.550456	1806.86	0.889559	76.5
230	62	425	109	51.4343	1.2583	0.46839	1799.51	1.03912	89.1667
220	112	357	83	53.0466	1.20685	2.28223	15268.9	1.12485	88
230	62	113	20	19.6883	0.526225	1.37662	4358.15	1.11316	95.5
561	285	1730	595	34.4339	0.874938	0.498813	2424.08	0.993184	79.3333
220	112	4512	1291	58.6994	1.46382	1.09152	4997.56	0.922439	75.6667
263	134	7	10	25.1624	0.678536	0.502193	2196.89	1.25606	100.333
230	62	4004	393	48.9259	1.26714	1.55115	5603.19	0.953098	80.6667
230	62	617	57	54.257	1.43402	1.32043	4035.5	1.09544	95.3333
220	112	5000	1242	33.2176	0.862782	1.07336	4433.38	0.844785	69.3333
220	112	2633	434	44.8817	1.17628	1.4486	5613.29	0.982521	81.5
220	112	2539	697	57.4312	1.41857	0.866495	4583.61	0.961098	76.3333
220	112	908	167	19.5904	0.540053	0.535005	2109.23	0.927075	74.6667
263	134	16	14	33.4669	0.814859	2.0186	9971.86	1.28812	104.333
320	163	3661	508	27.4658	0.756723	2.22393	8376.98	0.952916	77.3333
320	163	484	113	115.523	2.5611	0.998211	6347.62	1.10494	88.5
200	102	3457	617	54.2276	1.16033	1.20598	5909.45	0.945088	76.1667
220	112	3289	333	27.4072	0.670843	1.10251	5125.2	0.912557	74.6667
220	112	5000	1333	49.3249	1.20378	1.26714	6120.24	0.898865	73.6667
561	285	5000	845	36.9192	0.80644	1.59052	10505.8	0.959091	76.3333
561	285	1799	552	29.0553	0.746328	0.493705	2183.52	0.975655	79.1667
561	285	5000	1636	32.5271	0.791468	1.69423	8894.05	0.891742	71.5
561	285	641	753	39.8269	1.11859	0.309461	1113.71	1.00889	82.5
220	112	2082	126	17.3529	0.425858	0.92483	4499.75	0.868205	70.5
561	285	149	148	13.2316	0.358523	0.228177	906.437	0.92825	74.6667
220	112	812	272	56.1297	1.49939	0.64404	2843.22	1.02602	81.8333
220	112	4115	1674	50.6512	1.48712	0.829944	2669.32	0.907846	73.5
220	112	439	228	51.6017	1.10621	0.436872	2917.5	1.02054	81.6667
220	112	694	362	127.603	2.894	0.879496	4930.5	1.02026	82.8333
320	163	5000	3295	67.5491	1.71458	1.69606	7932.72	0.900464	73
585	297	5000	5000	58.9435	1.43409	1.00006	4881.89	0.884162	72.3333
561	285	3887	664	34.903	0.815568	0.784811	4309.36	0.972981	78.6667
200	54	542	57	62.6176	1.48581	2.09588	7454.92	1.09861	91.3333
220	112	189	47	31.7829	0.817629	1.02479	4579.48	1.12624	92
561	285	5000	2453	38.9032	1.1377	0.777809	2318.59	0.916749	75.1667
585	158	1558	803	43.5726	1.23336	0.360037	1182.81	0.971588	80.6667
587	298	1506	369	105.269	2.4734	0.91096	5044.78	0	0
274	139	5000	1343	47.5933	1.14396	0.827956	4059.14	0.908352	73.6667
219	112	5000	1200	29.7886	0.807025	0.70756	2622.78	0.836223	68.6667
557	283	1034	194	45.5427	1.07611	1.11853	6235.85	1.10358	89
557	283	1472	890	142.25	3.67997	1.23253	5902.42	1.01825	80.8333
561	285	4447	311	19.4307	0.451582	1.22322	6923.94	0.906664	73
332	90	5000	2070	57.2656	1.30928	0.932144	4977.04	0.863023	71.1667
581	295	5000	1528	33.4907	0.895296	1.11927	3761.79	0.92106	76.5
557	283	2907	521	35.2652	0.950783	0.873093	3379.82	1.01317	83.3333
326	166	2986	442	38.2142	0.973817	1.61689	6434.77	0.995828	81.8333
212	108	2123	534	70.5141	1.81972	1.38325	6329	0.991792	79.3333
318	162	3251	1435	47.3534	1.13504	0.541188	2929.49	0.918176	73.8333
407	207	5000	2287	41.6878	0.936087	1.52631	6651.63	0.864376	70
212	108	155	40	19.4307	0.469983	1.27402	5749.97	1.07144	87.6667
212	108	132	25	11.5307	0.299335	1.70769	6768.69	0.997662	81.3333
200	102	1887	622	73.8888	1.5359	0.785515	3875.81	0.968275	78.5
219	112	2522	300	32.7012	0.745368	1.13528	6334.53	0.947169	76
212	108	1246	233	38.1798	0.941523	0.811924	4288.41	0.998618	79.3333
390	199	3559	855	61.642	1.67153	2.16946	8164.89	1.0052	82.3333
219	112	828	318	106.3	2.76995	2.57606	11091.5	1.03748	83.8333
320	163	4545	252	17.5531	0.434976	0.832993	3251.38	0.827005	69.6667
561	285	5000	2184	27.741	0.721003	1.30872	5323.96	0.83252	68.5
220	112	85	32	36.7597	0.946656	0.640091	2874.29	1.15728	93.6667
320	163	2608	5000	139.554	2.9781	0.855667	5003.15	0.90416	74.5
212	108	230	52	61.3091	1.51298	0.814077	3991.09	1.13236	91.8333
320	163	5000	1372	30.8574	0.767203	1.64348	8333.98	0.84265	66.8333
220	112	2878	492	46.5903	1.20561	1.66101	6808.66	0.977575	80.3333
561	285	5000	1238	52.0319	1.07912	1.87702	15078.1	0.970374	75.8333
220	112	837	155	43.7065	0.966509	0.888772	5782.66	1.03748	82.1667
320	163	5000	4597	74.8284	1.85335	2.13804	6692.37	0.886868	72
220	112	5000	3474	39.7909	1.04457	1.39147	5811.74	0.796243	64.6667
320	163	704	191	36.4007	0.975765	0.629235	2582.44	1.04872	84.6667
585	297	5000	5000	64.0811	1.60234	0.849288	4157.54	0.896975	72.1667
220	112	5000	635	21.3002	0.547574	0.957704	4300.51	0.75229	60.8333
220	112	4569	2070	69.2528	1.80518	1.13308	4732.54	0.909112	73.8333
200	102	2371	416	52.703	1.13188	1.07714	5165.25	0.971383	78
610	164	1311	755	39.2772	0.990389	0.312246	1329.06	0.957459	79.5
561	285	213	72	36.8793	0.870052	0.758552	4213.55	1.1636	93.1667
561	285	5000	5000	37.0327	0.912753	1.45122	7782.43	0.769792	61
220	112	5000	2495	60.2125	1.45641	0.847296	4415.48	0.879427	71.1667
220	112	1160	672	56.4752	1.22464	0.463776	2784.61	0.955549	77.8333
220	112	5000	1379	53.2672	1.18986	1.45705	8330.34	0.895403	73
561	285	344	1357	21.6211	0.700507	0.179538	403.399	0.915841	74.6667
561	285	5000	5000	49.2893	1.33107	3.58731	14130.8	0.898047	73
220	112	5000	854	28.139	0.685666	2.34274	11750.4	0.823104	66.5
561	285	2216	386	33.4669	0.83289	0.882571	4591.25	1.0233	81.5
230	62	2699	516	57.3588	1.51028	0.771347	2582.44	0.946937	81.1667
220	112	5000	1373	27.4561	0.61216	1.18689	7513.94	0.691301	55
287	78	383	203	26.685	0.721454	0.283655	854.523	0.954213	81.8333
220	112	2583	476	52.2389	1.32364	1.7259	7950.53	0.988415	80.3333
220	112	5000	1084	34.4953	0.846714	1.01175	3239.95	0.85315	69
561	285	4433	943	48.2507	1.23122	0.874423	4047.72	0.993446	80
275	74	175	22	39.3126	1.09863	1.03005	2966.87	1.16766	100
585	158	5000	3951	43.2514	1.12719	0.704304	2524.88	0.837822	71
320	163	4800	5000	104.587	2.41496	0.897663	4490.25	0.878193	72.6667
220	112	1270	333	20.999	0.589694	0.43315	1451.39	0.884161	73.1667
561	285	1069	770	20.7833	0.522992	0.265186	1253.58	0.873229	70.6667
561	285	5000	4730	35.7711	0.870962	0.473335	2338.27	0.827195	67
561	285	181	98	23.118	0.63771	0.489739	1669.8	1.10488	92
561	285	1289	3543	79.953	2.21202	0.365818	1442.22	0.956046	77
561	285	1306	201	18.335	0.528557	0.978813	3047.35	1.01011	83.8333
320	163	1314	1608	21.2472	0.561413	0.237732	985.418	0.768591	62.5
561	285	5000	808	37.4089	0.956999	1.26245	5933.39	0.983515	79
320	163	4639	2262	61.1213	1.66961	0.790025	3114.63	0.922936	74.3333
561	285	5000	576	18.5518	0.487541	1.26688	5153.75	0.848725	69.8333
561	285	5000	3366	59.7793	1.63726	1.01612	3738.02	0.930439	76.5
561	285	5000	5000	63.3337	1.56572	1.38586	6580.94	0.846296	69
561	285	2017	467	33.8384	0.904521	2.626	11452.9	1.04897	83.8333
561	285	2593	809	46.9534	1.17103	0.605481	3032.37	1.0002	80.1667
220	112	237	42	56.8537	1.56239	1.24107	4604.28	1.15536	94
561	285	972	205	29.5983	0.845469	1.71924	5775.1	1.09823	90
220	112	202	54	23.0522	0.614125	1.56294	6832.45	1.10008	88.6667
320	163	1239	148	17.4139	0.515017	1.36117	3703.94	0.983004	81.8333
561	285	5000	5000	79.1632	1.89314	1.05385	5610.01	0.909421	73.3333
561	285	1972	553	45.2804	1.10204	0.625993	3116.83	1.02198	83.3333
320	163	5000	541	22.7748	0.60048	1.42307	5943.75	0.870121	70.6667
585	158	5	5	1.05723	0.0279269	1.04836	3719.63	1.10481	93
561	285	47	40	21.0664	0.587539	0.551683	1970.41	1.18063	96.6667
220	112	1138	178	35.5173	0.946953	1.49432	5455.59	1.03454	85.1667
220	112	491	77	18.4595	0.528743	1.10355	3688.32	1.01759	82.6667
214	109	327	48	13.7667	0.399464	0.859188	2981.53	0.984047	78.6667
220	112	5	8	10.7988	0.266185	1.4982	6911.88	1.19622	98
230	62	3718	454	55.1058	1.26522	0.959283	4783.38	0.939166	78.3333
561	285	556	605	30.2266	0.794576	0.287263	1011.51	0.986742	83.1667
557	283	2871	205	17.0179	0.381307	0.725981	4246.33	0.878291	71.3333
561	285	3861	758	40.7724	0.883155	0.727627	4992.26	0.973613	77
45	23	65	10	13.1301	0.36526	1.58801	4946.74	0.986889	82.6667
220	112	3406	472	30.5404	0.874678	1.06282	3815.16	0.934273	75
561	285	5000	1874	28.5223	0.820107	1.36399	4478.52	0.883355	72.6667
230	62	320	37	30.7258	0.792644	1.43837	5521.41	1.10404	92.5
220	112	5000	5000	79.6937	2.22444	1.25419	4944.58	0.850508	68.5
214	109	202	40	48.8289	1.26628	1.32458	6440.38	1.15975	91.8333
561	285	786	178	25.9264	0.727356	1.6493	5977.55	1.09575	88.6667
220	112	164	56	24.692	0.707579	2.14218	8097.51	1.12873	89.8333
220	112	1118	318	43.7934	1.13736	0.636818	2732.15	0.997293	81.3333
220	112	1099	108	19.9069	0.486136	1.07852	5739.94	0.949469	75.3333
220	112	5000	1747	60.945	1.47193	1.70267	8633.65	0.90413	73.5
230	62	5000	593	33.5504	0.928096	1.11374	3711.78	0.873372	73
561	285	5000	5000	57.8369	1.59676	1.50127	6101.34	0.81739	65.5
220	112	396	73	63.8502	1.41576	1.08651	6306.96	1.11492	90.6667
220	112	3581	1278	50.6329	1.2601	0.712214	3163.28	0.909692	75
220	112	151	38	53.4695	1.19742	2.02285	13002.3	1.18029	93.6667
220	112	5000	820	26.1675	0.6408	0.930811	4282.37	0.7968	65.8333
220	112	1721	292	35.5679	0.993391	0.947391	3461.75	0.991011	80.8333
320	163	242	122	49.0143	1.06249	0.449122	3058.11	1.08814	86.1667
410	111	2342	350	30.8134	0.780399	0.515872	2222.64	0.9413	78
585	297	382	104	30.8134	0.825178	1.43799	5399.96	1.15321	95.3333
220	112	3036	566	52.7887	1.32365	1.51014	8297.71	0.973539	76.8333
320	163	1044	216	29.2942	0.789441	2.28547	8447.42	1.04719	84.8333
561	285	5000	1004	30.4535	0.741543	0.874682	4704.76	0.918321	73.3333
320	163	1451	207	24.3602	0.674671	1.0009	3657.27	0.999184	81.5
557	283	340	92	17.9028	0.452689	0.830704	3601.03	1.05965	87
220	112	218	37	13.437	0.332514	1.87259	9097.54	0.991009	79.8333
220	112	1149	285	47.7999	1.22125	0.732108	3246.8	1.0107	82.6667
699	355	17	15	39.8197	0.900126	0.634474	3751.2	1.30894	105.333
561	285	207	47	61.8091	1.34506	0.98128	6887.81	1.2079	95.1667
561	285	5000	2715	39.6475	1.14464	1.25467	3988.28	0.909429	74.5
220	112	68	21	51.5179	1.13255	0.801708	5670.27	1.19884	94.3333
228	62	3059	346	46.2301	1.4006	1.17324	2981.53	0.967905	81.5
561	285	5000	1205	43.4156	1.19335	0.893541	3520.77	0.973273	77.6667
561	285	5000	5000	106.031	2.31955	1.18885	7030.45	0.912312	74.5
276	140	4581	1173	49.0409	1.31776	0.931813	3960.29	0.93441	75
390	199	4796	984	32.5155	0.792556	0.635512	2726.38	0.903213	75.5
220	112	427	88	19.6393	0.491179	0.557543	2514.23	0.970773	79.8333
220	112	537	130	43.6356	0.973115	0.690191	3657.27	1.04966	86.6667
200	102	1342	328	63.3909	1.63987	2.4616	7325.47	1.02724	85.1667
220	112	309	63	47.4989	1.14544	1.71841	9586.33	1.1339	90
220	112	2807	409	30.3993	0.810063	0.880148	3459.31	0.932452	76.5
561	285	5000	3813	43.92	1.14146	2.17372	9840.5	0.88812	71.1667
220	112	38	18	44.9628	1.08783	0.562325	3132.23	1.20289	95.5
230	62	486	95	52.722	1.42659	0.566197	1911.62	1.05372	88.6667
585	158	3555	272	30.8354	0.835479	1.47814	4625.41	1.01308	86.3333
561	285	4517	308	17.2166	0.439468	1.55002	6960.28	0.903998	73.1667
220	112	1542	999	55.9578	1.61825	0.554893	1808.14	0.951035	78.3333
220	112	675	339	139.001	3.53011	1.59259	7116.83	1.02219	83.5
220	112	634	140	53.3442	1.32947	0.822684	4445.44	1.06523	84.8333
220	112	5000	927	47.3705	1.12337	1.4489	7601.29	0.918563	74.8333
220	112	1524	306	41.5225	1.0573	0.81617	3505.92	0.993181	81.6667
320	163	5000	1526	52.551	1.52109	1.30923	4225.44	0.94029	76.8333
220	112	278	64	58.9435	1.53171	0.790641	3290.55	1.12035	91.8333
230	62	4193	157	18.4924	0.500144	0.808661	1715.1	0.827061	69.6667
561	285	174	32	8.85	0.249374	0.94807	3114.63	0.987647	82
230	62	444	268	154	4.27045	1.02249	3255.79	0.999347	84.1667
561	285	3101	557	40.6	1.01094	0.905967	4544.01	1.0152	82.1667
561	285	5000	3862	54.7094	1.30176	0.696429	3488.67	0.902299	73.5
220	112	3689	1459	40.9716	0.881811	0.511944	3217.21	0.847379	68.5
561	285	5000	5000	55.6054	1.37048	1.39126	6872.8	0.837484	67.8333
334	90	5000	3186	48.1984	1.37463	1.00772	3767.09	0.8389	68.1667
220	112	5000	1810	42.5468	1.03735	1.24424	6100.01	0.85081	69
561	285	5000	5000	35.5806	0.822372	1.05576	5802.87	0.77342	63
561	285	5000	4044	73.8222	1.79496	1.27543	6496.81	0.925334	75.1667
561	285	5000	5000	50.4414	1.21443	1.25123	6669.06	0.779388	62.3333
561	285	903	185	35.2652	0.908054	0.983299	4030.65	1.09521	90
220	112	1224	685	45.0521	1.07245	0.440619	2313.7	0.940344	76
220	112	5000	2362	32.6082	0.79954	1.08355	5863.93	0.758324	60
220	112	122	38	24.8243	0.612983	0.900811	4219.49	1.11359	91
230	62	116	39	20.4967	0.535685	0.35679	1259.78	1.02011	86.6667
276	140	29	111	24.196	0.638502	0.19037	795.118	1.0425	84.6667
320	163	1316	259	44.6152	1.24151	0.918891	3435.03	1.04606	85
320	163	3152	566	52.7315	1.27223	1.20604	6284.99	0.994762	80.5
220	112	1403	208	29.8948	0.638042	2.31449	10611.7	0.975315	77.5
561	285	5000	3461	44.5669	1.12789	0.469246	2279.72	0.897908	72.3333
214	109	5000	442	22.2617	0.589135	1.10346	4549.39	0.834654	67.3333
561	285	377	85	73.027	1.90776	0.770231	2971.05	1.15845	96.1667
585	158	700	289	29.6405	0.742846	0.321294	1117.6	0.985785	85.3333
320	163	1036	388	45.6579	1.14445	0.530649	2539.15	1.0112	81.6667
585	158	4200	775	32.3538	0.702919	0.427033	2241.51	0.884073	74.1667
585	158	4905	1447	48.6529	1.05159	0.456382	2341.57	0.908428	76.5
220	112	2989	1082	53.5371	1.36959	0.730357	3432.61	0.929567	74.6667
561	285	5000	776	33.7782	0.862651	1.03845	4172.2	0.970147	80.6667
220	112	436	78	21.1641	0.545771	0.814309	3701.33	1.01519	82
220	112	2557	1417	45.7982	1.27494	0.548221	2033.87	0.907487	73.8333
220	112	3302	542	43.8409	1.14373	1.57223	7644.51	0.964005	76.3333
220	112	968	132	20.5844	0.528486	2.07548	10132.3	0.977234	78
161	82	5000	1401	35.9243	0.894897	0.94328	3782.58	0.815115	65.1667
561	285	515	140	21.0964	0.511604	0.619953	3279.34	1.0344	82.8333
581	157	1777	209	99.5581	2.32312	1.31352	5136	1.07265	93.1667
561	285	5000	1809	39.8988	1.03837	1.03522	4423.51	0.926993	75
230	62	3300	226	34.1045	0.862688	1.21865	4148.66	0.945673	81.5
561	285	1119	213	39.4904	1.00873	1.57246	7973.84	1.10322	87.5
220	112	2699	140	18.4398	0.411133	0.8179	5177.94	0.827467	65.8333
285	77	509	55	33.1113	0.986803	0.93492	1859.08	1.09206	97.6667
220	112	959	123	18.1532	0.396093	0.443495	2583.12	0.842823	69
220	112	5000	1297	27.0774	0.647958	0.611232	3436.76	0.75923	60.6667
561	285	5000	5000	45.1091	1.11412	0.725828	3323.23	0.861485	70.6667
220	112	2987	847	31.7151	0.833668	0.551453	2447.61	0.878981	70.6667
557	283	2058	364	32.4808	0.779602	0.836738	4495.03	1.01844	82
561	285	5000	1163	30.7805	0.764301	0.767163	3539.28	0.911402	74.6667
581	157	2046	874	82.9818	2.36879	0.596984	1710.52	0.992858	84.3333
220	112	369	139	90.4265	2.2573	0.669504	2841.06	1.07334	89.1667
220	112	5000	2150	44.1187	1.18333	0.845253	3458.48	0.862485	69.6667
230	62	1512	93	24.3255	0.602404	1.62244	6782.86	0.970803	81.5
219	112	1243	244	44.6555	1.1913	0.90927	3546.72	1.02054	83.8333
220	112	4340	1173	65.5789	1.43015	1.08396	7214.39	0.926759	73.6667
561	285	2322	522	49.7721	1.27106	0.801594	3660.19	1.03661	83.6667
561	285	2423	569	21.6905	0.559361	0.456988	2180.69	0.909043	72.8333
561	285	5000	899	28.3502	0.762009	2.0375	6931.58	0.949947	79.8333
561	285	5000	1905	34.8905	0.804172	0.633752	3675.59	0.87996	70.5
263	134	16	8	39.2276	1.06011	0.817413	3370.07	1.29123	104.167
561	285	5000	1565	33.9712	0.826304	0.59073	2962.89	0.903558	73
561	285	5000	4937	52.7315	1.13536	0.5011	3594.19	0.872582	69
230	62	559	31	14.8939	0.384379	1.19618	4805.93	0.960125	79.8333
561	285	437	293	36.8128	0.869201	0.371815	2171.55	1.04952	83.3333
220	112	997	196	39.0228	0.956078	0.797415	3903.6	1.01712	81.8333
561	285	1798	369	27.7016	0.622343	0.602591	3644.85	0.977127	78.3333
220	112	96	60	38.4425	1.05334	0.408609	1498.6	1.11117	90.8333
561	285	5000	5000	52.2578	1.32597	0.404334	1934.73	0.837854	67.6667
561	285	5000	1654	23.4329	0.719768	0.727942	1732.21	0.864208	72.8333
220	112	1668	468	32.9584	0.907921	0.570406	2171.55	0.942263	76.3333
320	163	126	48	26.5193	0.758089	1.74549	6265.73	1.17511	94.3333
561	285	3246	4114	53.5178	1.32809	0.380031	1703.36	0.911076	75
561	285	5000	5000	51.7042	1.4225	0.440385	1762.78	0.863038	69.3333
220	112	5000	2783	56.6181	1.43131	1.49614	7248.7	0.867553	69.3333
220	112	3241	308	27.84	0.648863	1.2171	7327.74	0.913503	72.1667
585	158	3844	510	83.2068	2.0624	1.40835	5671.53	1.0213	85.1667
393	200	3018	748	54.3943	1.31649	0.803695	4449.57	0.989861	78.6667
220	112	98	5	6.57018	0.173379	0.880022	3675.59	0.866017	70.3333
220	112	139	89	42.6467	1.06353	0.39711	1698	1.08474	90
220	112	3797	684	50.1871	1.12648	1.10824	6733.99	0.94042	75.3333
561	285	5000	5000	98.4324	2.15536	1.26496	7512.14	0.888747	72
393	200	5000	1201	42.855	1.09093	0.961676	4759.46	0.937607	74.6667
561	285	4015	568	29.4301	0.69862	2.05962	11862.4	0.981624	77.5
383	195	45	14	59.5854	1.25545	0.997486	7314.51	1.27292	101
320	163	1036	237	31.7942	0.870701	0.675359	2703.34	1.02071	82
585	297	5000	5000	46.3136	1.13545	0.53683	2733.78	0.837601	67.5
561	285	2845	279	17.9795	0.472553	1.58522	6773.67	0.951713	77
220	112	5000	3468	47.7396	1.20346	1.15236	5556.11	0.826518	66.6667
212	108	2128	240	27.2807	0.694812	1.18825	6025.56	0.951921	75.5
561	285	5000	2021	30.3021	0.761954	0.76455	3521.98	0.859224	69.8333
220	112	4739	665	34.1166	0.863486	1.02615	4516.41	0.901563	73.8333
220	112	2042	989	99.1994	2.40341	2.45989	13312	0.971482	77.5
220	112	498	81	20.4967	0.559222	1.04591	4186.57	1.02278	82.1667
220	112	2116	374	37.9119	1.05635	2.19087	8252.44	0.99399	80.6667
561	285	5000	5000	90.0357	2.22864	0.942939	4729.45	0.882929	71.3333
230	62	171	30	59.9846	1.78315	0.590429	1834.52	1.12893	92.8333
220	112	351	67	21.7756	0.530171	0.836307	4765.92	1.02622	80.5
561	285	1949	299	25.5962	0.682922	1.07449	4096.72	1.02182	84.3333
220	112	3799	623	38.8751	1.06961	1.18458	4496.05	0.941786	76.3333
561	285	433	597	37.5036	1.00771	0.281809	1050.24	1.01685	84.1667
561	285	5000	2417	58.172	1.54719	0.766181	3313.94	0.9483	76.5
585	158	1780	204	54.4237	1.37185	0.848767	3238.29	1.06433	90
220	112	3592	690	50.9906	1.30035	1.37195	6981.88	0.956512	75.1667
200	102	309	122	26.7707	0.731092	2.43601	7334.37
220	112	1506	383	55.405	1.46329	0.839965	3403.26	1.00253	81.8333
220	112	5000	5000	72.032	1.79623	1.31783	6238.89	0.839738	68.5
220	112	1757	831	31.1222	0.798319	0.409109	2043.28	0.878247	69.8333
220	112	5000	2705	64.5455	1.56678	1.38314	7485.03	0.879557	70.1667
561	285	5000	5000	50.5325	1.17972	0.414215	2173.07	0.860507	70.1667
561	285	5000	1899	34.4707	0.908091	0.862743	3249.64	0.901657	74.5
220	112	556	108	36.6739	0.931581	0.90659	4293.39	1.06371	85.3333
561	285	5000	2645	71.4881	1.59536	0.896763	5049.7	0.944116	77.1667
220	112	2684	431	26.5523	0.714566	0.686763	2705.23	0.902148	73.3333
220	112	3051	662	60.7364	1.47865	1.85297	9293.82	0.973697	78.6667
561	285	1993	1575	44.9871	1.08391	0.374279	1906.51	0.952007	77.3333
220	112	1162	213	65.1777	1.5683	1.39965	7347.64	1.04878	84.1667
220	112	767	119	26.647	0.687097	1.46171	6978.72	1.03033	81.8333
561	285	27	670	32.8413	0.920562	0.118906	401.466	1.02443	84.6667
220	112	5000	2381	31.8849	0.859483	0.814518	3386.62	0.787097	62.8333
585	158	4041	337	33.2176	0.885965	1.91871	6553.88	1.0093	85.5
220	112	86	100	21.399	0.559717	0.265477	973.948	0.999486	83.6667
220	112	3521	895	59.36	1.63151	1.62561	6110.55	0.957372	77
220	112	22	30	15.3606	0.401306	2.83297	13596.9	1.14848	90.3333
200	102	2943	2878	66.8215	1.57063	0.573957	2300.55	0.878035	71
220	112	2267	465	31.6361	0.760761	0.6103	3155.51	0.91022	73.1667
220	112	4206	1316	74.6799	1.63957	2.20571	13814.5	0.936097	75.1667
561	285	33	11	6.18239	0.17916	0.319548	1059.47	0.914526	73.6667
220	112	231	40	100.334	2.58345	1.40689	6512.54	1.1466	92.3333
220	112	3420	434	34.643	0.86128	1.34105	6685.48	0.941799	76.1667
220	112	5000	538	29.1797	0.753057	1.60686	7785.14	0.89675	71.6667
214	109	5	5	5.01127	0.146905	0.230978	720.646	0.97085	79
220	112	5000	4967	66.3169	1.63382	1.13314	5299.85	0.844956	68.5
561	285	5000	374	21.3002	0.441872	1.30703	9439.84	0.867418	69
561	285	5000	3121	33.076	0.880846	0.998312	3675.59	0.851631	69.6667
320	163	4776	263	17.5122	0.43991	0.853853	4116.84	0.826518	66.6667
220	112	16	14	15.4151	0.37041	1.11104	5328.67	1.15643	93.6667
561	285	2047	5000	63.5283	1.45502	0.282049	1510.71	0.884185	72.3333
561	285	5000	1883	27.3487	0.621257	0.703482	4210.08	0.803146	64.5
220	112	2277	1083	46.7926	1.19418	0.543904	2430.54	0.918131	75
220	112	2214	4777	93.0089	2.46605	0.677629	2525.37	0.885965	73.3333
230	62	95	724	268.313	7.03193	0.772119	2875.18	0.946063	79.6667
220	112	958	175	65.2718	1.53654	1.23568	6622.07	1.05938	86
561	285	3976	403	21.134	0.565202	1.19999	4985.13	0.951553	76.6667
585	158	5000	1136	33.8263	0.83371	0.768971	3190.46	0.87877	74
561	285	5000	5000	59.963	1.26679	0.643735	3993.79	0.845723	69
220	112	2952	139	17.578	0.405464	0.85785	4882.8	0.819099	66.3333
700	189	64	16	35.1399	0.928262	1.13358	3664.43	1.26963	104.333
220	112	3775	499	36.0909	0.853839	1.90446	10578.8	0.934627	74.8333
585	158	5000	950	26.7516	0.758319	0.487828	1471.88	0.880718	74.1667
220	112	5000	4540	60.8351	1.62719	2.21743	9641.59	0.850424	68
561	285	3800	825	43.8646	0.977239	0.716388	4521.02	0.980044	78.6667
561	285	5000	1313	33.9832	0.896336	0.691537	2954.94	0.931113	75.3333
220	112	919	278	108.119	2.61192	2.04634	11626.2	1.04175	81.8333
220	112	4084	1281	37.789	0.873516	0.569002	3220.78	0.853611	68.6667
220	112	2204	153	21.2926	0.476658	1.40775	8197.51	0.90072	72.6667
220	112	1036	781	45.6909	1.18927	0.408756	1904.66	0.944653	75.3333
220	112	4303	3059	85.846	2.25229	1.94997	8576.32	0.900416	72.5
585	158	1325	156	57.049	1.47737	0.831565	3265.71	1.08428	90.5
561	285	2891	5000	51.0459	1.2393	0.258932	1042.15	0.818691	69.1667
585	158	4680	365	25.4055	0.675444	0.739573	2488.11	0.93806	79.6667
561	285	5000	1491	61.011	1.5432	0.891117	4383.53	0.978473	78
220	112	2405	753	53.1904	1.29315	0.717284	3067.85	0.948591	79.3333
671	341	305	66	51.9006	1.42305	1.70625	5817.56	1.21296	101
220	112	3327	3126	49.0232	1.34555	0.512784	1859.52	0.863231	70.5
230	62	1524	148	29.6721	0.880433	0.778465	1880.36	0.981745	85
220	112	5000	5000	67.0632	1.87022	2.11379	8265.8	0.805167	64.3333
220	112	2798	676	58.0461	1.67649	1.70473	5972.44	0.978053	78.8333
220	112	2952	241	23.1427	0.561392	1.09488	6024.97	0.896676	71.3333
220	112	1760	184	16.9327	0.439327	0.527693	2451.4	0.833464	66.5
220	112	5000	2034	46.5063	1.20287	0.857017	3790.34	0.868847	70.5
561	285	1980	436	62.257	1.66271	0.93391	3615.25	1.05978	87.1667
220	112	7	5	5.83885	0.157477	0.395409	1522.46	0.945706	77.1667
220	112	5000	833	28.3906	0.789013	1.57415	5453.98	0.862773	71
561	285	3099	545	29.9908	0.763071	0.74328	3363.11	0.979369	79.1667
220	112	4422	1308	54.1983	1.31062	0.885797	4793.59	0.910895	72.6667
561	285	224	214	24.5256	0.678972	0.313771	1172.95	1.04606	85
220	112	2040	509	55.7863	1.50561	0.944049	3836.73	0.98586	79
220	112	289	52	16.7176	0.434892	1.37827	6211.08	1.02462	82.1667
220	112	5000	1246	59.1674	1.29707	1.22139	7420.63	0.912781	73.6667
561	285	5000	5000	99.5401	2.36675	2.58016	14573.7	0.85374	68.1667
320	163	555	142	19.7797	0.430384	0.39866	1383.17	0.917854	74.1667
230	62	1284	206	49.7542	1.38468	0.686694	2341.32	1.00079	83.3333
219	112	5000	1494	47.5761	1.11188	0.81894	4136.18	0.880239	72.1667
561	285	5000	1440	32.3423	0.841253	1.51388	6397.05	0.91527	74.8333
220	112	5000	754	27.2224	0.733173	0.856931	3128.55	0.852329	70.1667
320	163	4137	647	38.1591	1.00438	1.09547	4506.46	0.960034	78.1667
320	163	2488	272	23.8029	0.626343	1.32588	5796.14	0.961539	77.5
320	163	411	209	28.6648	0.745688	0.397852	1792.9	1.01215	81.1667
220	112	3687	1325	67.403	1.89625	1.43079	4594.55	0.939906	78.3333
320	163	131	31	53.402	1.23406	1.18274	6705	1.20613	97
320	163	5000	3775	66.7974	1.70585	2.66879	12186.1	0.896195	72.3333
334	90	126	25	18.0693	0.458603	0.690098	2496.53	1.07838	92
561	285	5000	1905	54.1983	1.29629	1.14927	6173.98	0.949281	76.5
221	60	5000	568	38.7141	0.984182	0.876238	3026.68	0.885868	75.1667
320	163	152	85	29.9374	0.777574	0.436511	1901.45	1.09104	88.8333
220	112	590	106	32.585	0.810347	0.978316	4789.17	1.05234	84.6667
220	112	2981	558	36.8726	0.99582	0.856235	3469.28	0.939626	75.3333
220	112	2070	258	27.9791	0.771531	1.47409	5146.24	0.97337	80
220	112	1625	275	33.2294	0.741426	0.717381	4209.27	0.951505	76.6667
334	90	990	93	27.505	0.753154	0.892548	3154.03	1.03382	86.3333
220	112	1801	579	59.0394	1.65434	0.826283	3158.29	0.982901	78.8333
220	112	5000	3211	44.583	1.1531	1.72813	7878.9	0.823713	66.5
561	285	5000	5000	72.032	1.94402	2.00707	8174.87	0.822655	66.5
220	112	1358	220	38.9102	0.99855	1.78594	8552.63	1.02665	81.5
585	158	5000	1074	79.8088	1.97414	1.0844	4465.1	0.974288	82
220	112	2029	421	32.6663	0.832355	0.656006	2696.43	0.935611	77.5
561	285	2033	352	33.6222	0.904444	0.979938	4102.01	1.04182	83.8333
561	285	5000	1128	27.2224	0.691814	1.17791	5184.33	0.891387	73
561	285	5000	3029	52.7696	1.26302	0.888288	5031.31	0.913633	72.3333
561	285	5000	3280	55.365	1.41987	0.702636	3322.46	0.922202	74
[truncated: 1,171 more rows]
